# Supplementary material for: Transcriptome analysis of Polygonum minus reveals candidate genes involved in important secondary metabolic pathways of phenylpropanoids and flavonoids
Source: PeerJ. 2017 Feb 28;5:e2938. doi: 10.7717/peerj.2938 (PMC5333554; doi:10.7717/peerj.2938)
Supplement: Supplemental Information 3 — KEGG pathway mapping results. [file peerj-05-2938-s003.xlsx]

## Sheet: KEGG pathway mapping
Data S1a. KEGG pathway mapping result.
No.	KEGG Pathway	Total KEGG entry	Entry found	Transcript count	% mapped
1	ko01100 Metabolic pathways	2570	1107	141795	43.0739
2	ko01110 Biosynthesis of secondary metabolites	949	474	28643	49.9473
3	ko00909 Sesquiterpenoid and triterpenoid biosynthesis	66	12	100	18.1818
4	ko00130 Ubiquinone and other terpenoid-quinone biosynthesis	55	22	517	40
5	ko00900 Terpenoid backbone biosynthesis	53	28	1122	52.8302
6	ko00906 Carotenoid biosynthesis	46	13	1259	28.2609
7	ko00950 Isoquinoline alkaloid biosynthesis	42	24	919	57.1429
8	ko00904 Diterpenoid biosynthesis	42	15	107	35.7143
9	ko00940 Phenylpropanoid biosynthesis	32	23	3753	71.875
10	ko00960 Tropane, piperidine and pyridine alkaloid biosynthesis	25	18	1076	72
11	ko00902 Monoterpenoid biosynthesis	22	12	54	54.5455
12	ko00941 Flavonoid biosynthesis	19	17	893	89.4737
13	ko00966 Glucosinolate biosynthesis	15	6	57	40
14	ko00942 Anthocyanin biosynthesis	14	4	985	28.5714
15	ko00403 Indole diterpene alkaloid biosynthesis	13	3	353	23.0769
16	ko00943 Isoflavonoid biosynthesis	13	5	34	38.4615
17	ko00945 Stilbenoid, diarylheptanoid and gingerol biosynthesis	13	6	629	46.1538
18	ko00944 Flavone and flavonol biosynthesis	12	10	680	83.3333
19	ko00901 Indole alkaloid biosynthesis	10	8	82	80
20	ko00232 Caffeine metabolism	9	6	106	66.6667
21	ko00402 Benzoxazinoid biosynthesis	9	2	12	22.2222
22	ko00908 Zeatin biosynthesis	8	6	668	75
23	ko00965 Betalain biosynthesis	7	5	1606	71.4286
24	ko01058 Acridone alkaloid biosynthesis	2	1	4	50
25	ko01120 Microbial metabolism in diverse environments	982	342	16836	34.8269
26	ko02010 ABC transporters	451	15	1514	3.32594
27	ko02020 Two-component system	428	33	5791	7.71028
28	ko01200 Carbon metabolism	342	137	7244	40.0585
29	ko05200 Pathways in cancer	313	20	8434	6.38978
30	ko00230 Purine metabolism	263	84	56768	31.9392
31	ko04151 PI3K-Akt signaling pathway	237	16	9662	6.75105
32	ko01230 Biosynthesis of amino acids	226	136	8758	60.177
33	ko05206 MicroRNAs in cancer	226	19	5741	8.40708
34	ko04060 Cytokine-cytokine receptor interaction	225	1	3820	0.444444
35	ko00190 Oxidative phosphorylation	215	13	22543	6.04651
36	ko05166 HTLV-I infection	206	15	11801	7.28155
37	ko01220 Degradation of aromatic compounds	198	57	3106	28.7879
38	ko04010 MAPK signaling pathway	191	9	12317	4.71204
39	ko00240 Pyrimidine metabolism	167	57	50106	34.1317
40	ko04014 Ras signaling pathway	164	13	8710	7.92683
41	ko05205 Proteoglycans in cancer	159	12	5908	7.54717
42	ko00680 Methane metabolism	158	54	2014	34.1772
43	ko04015 Rap1 signaling pathway	154	7	8189	4.54545
44	ko04810 Regulation of actin cytoskeleton	151	9	4524	5.96026
45	ko05169 Epstein-Barr virus infection	150	14	6903	9.33333
46	ko05016 Huntington's disease	149	12	3492	8.05369
47	ko04144 Endocytosis	148	8	6562	5.40541
48	ko05202 Transcriptional misregulation in cancer	147	10	4163	6.80272
49	ko04024 cAMP signaling pathway	146	16	3294	10.9589
50	ko00520 Amino sugar and nucleotide sugar metabolism	144	63	2880	43.75
51	ko04062 Chemokine signaling pathway	144	12	2253	8.33333
52	ko04510 Focal adhesion	144	10	5109	6.94444
53	ko05010 Alzheimer's disease	141	18	1930	12.766
54	ko04141 Protein processing in endoplasmic reticulum	140	10	2263	7.14286
55	ko04020 Calcium signaling pathway	139	17	5473	12.2302
56	ko03013 RNA transport	138	6	2371	4.34783
57	ko00330 Arginine and proline metabolism	134	77	2591	57.4627
58	ko05203 Viral carcinogenesis	134	10	5839	7.46269
59	ko05152 Tuberculosis	131	10	2502	7.63359
60	ko05168 Herpes simplex infection	129	10	3474	7.75194
61	ko04120 Ubiquitin mediated proteolysis	124	3	803	2.41935
62	ko04932 Non-alcoholic fatty liver disease (NAFLD)	124	15	1548	12.0968
63	ko04630 Jak-STAT signaling pathway	123	5	1505	4.06504
64	ko04111 Cell cycle - yeast	122	7	8214	5.7377
65	ko05012 Parkinson's disease	122	9	4101	7.37705
66	ko03040 Spliceosome	120	1	1320	0.833333
67	ko04022 cGMP-PKG signaling pathway	116	16	4563	13.7931
68	ko05164 Influenza A	113	8	1150	7.07965
69	ko01052 Type I polyketide structures	111	4	3276	3.6036
70	ko05161 Hepatitis B	111	11	1781	9.90991
71	ko04921 Oxytocin signaling pathway	109	17	4380	15.5963
72	ko05162 Measles	109	7	1496	6.42202
73	ko04550 Signaling pathways regulating pluripotency of stem cells	108	9	3090	8.33333
74	ko00564 Glycerophospholipid metabolism	107	54	6014	50.4673
75	ko00720 Carbon fixation pathways in prokaryotes	107	36	1603	33.6449
76	ko00860 Porphyrin and chlorophyll metabolism	107	45	4562	42.0561
77	ko04110 Cell cycle	107	9	2690	8.41121
78	ko04390 Hippo signaling pathway	106	3	1762	2.83019
79	ko04142 Lysosome	102	27	1860	26.4706
80	ko00500 Starch and sucrose metabolism	101	63	6057	62.3762
81	ko04068 FoxO signaling pathway	100	17	3729	17
82	ko04113 Meiosis - yeast	99	7	3100	7.07071
83	ko04380 Osteoclast differentiation	99	10	3558	10.101
84	ko04514 Cell adhesion molecules (CAMs)	99	1	1065	1.0101
85	ko04310 Wnt signaling pathway	98	10	1857	10.2041
86	ko00051 Fructose and mannose metabolism	96	48	1785	50
87	ko00630 Glyoxylate and dicarboxylate metabolism	95	42	2097	44.2105
88	ko04145 Phagosome	95	3	162	3.15789
89	ko00010 Glycolysis / Gluconeogenesis	94	49	3489	52.1277
90	ko01501 beta-Lactam resistance	94	7	2750	7.44681
91	ko05145 Toxoplasmosis	94	7	1661	7.44681
92	ko00260 Glycine, serine and threonine metabolism	93	58	2166	62.3656
93	ko04270 Vascular smooth muscle contraction	93	10	2942	10.7527
94	ko00620 Pyruvate metabolism	91	52	2467	57.1429
95	ko00920 Sulfur metabolism	91	29	928	31.8681
96	ko04261 Adrenergic signaling in cardiomyocytes	91	9	3179	9.89011
97	ko00362 Benzoate degradation	90	37	665	41.1111
98	ko04722 Neurotrophin signaling pathway	90	12	3658	13.3333
99	ko05120 Epithelial cell signaling in Helicobacter pylori infection	90	9	3475	10
100	ko00640 Propanoate metabolism	88	41	1412	46.5909
101	ko04668 TNF signaling pathway	87	6	2373	6.89655
102	ko04064 NF-kappa B signaling pathway	86	7	1366	8.13953
103	ko04725 Cholinergic synapse	86	10	1509	11.6279
104	ko04360 Axon guidance	85	6	7068	7.05882
105	ko04611 Platelet activation	85	15	3219	17.6471
106	ko04910 Insulin signaling pathway	85	23	2880	27.0588
107	ko04660 T cell receptor signaling pathway	84	11	3604	13.0952
108	ko04650 Natural killer cell mediated cytotoxicity	83	7	2585	8.43373
109	ko04724 Glutamatergic synapse	83	11	2440	13.253
110	ko05034 Alcoholism	83	9	5805	10.8434
111	ko00650 Butanoate metabolism	82	40	1278	48.7805
112	ko03008 Ribosome biogenesis in eukaryotes	82	9	4615	10.9756
113	ko04726 Serotonergic synapse	82	17	1112	20.7317
114	ko04919 Thyroid hormone signaling pathway	82	12	2486	14.6341
115	ko05132 Salmonella infection	82	6	656	7.31707
116	ko05142 Chagas disease (American trypanosomiasis)	82	7	1611	8.53659
117	ko05414 Dilated cardiomyopathy	82	2	748	2.43902
118	ko00270 Cysteine and methionine metabolism	81	53	3259	65.4321
119	ko04728 Dopaminergic synapse	81	12	3380	14.8148
120	ko04152 AMPK signaling pathway	80	24	2289	30
121	ko02060 Phosphotransferase system (PTS)	79	2	916	2.53165
122	ko05133 Pertussis	79	6	1619	7.59494
123	ko05160 Hepatitis C	79	8	2116	10.1266
124	ko03018 RNA degradation	78	10	4070	12.8205
125	ko04626 Plant-pathogen interaction	78	9	373	11.5385
126	ko05146 Amoebiasis	78	8	380	10.2564
127	ko00360 Phenylalanine metabolism	77	41	2160	53.2468
128	ko04640 Hematopoietic cell lineage	77	2	1152	2.5974
129	ko00561 Glycerolipid metabolism	76	36	5221	47.3684
130	ko04071 Sphingolipid signaling pathway	76	0	0	0
131	ko04114 Oocyte meiosis	76	10	4519	13.1579
132	ko04620 Toll-like receptor signaling pathway	76	4	1078	5.26316
133	ko00030 Pentose phosphate pathway	75	33	1494	44
134	ko04530 Tight junction	75	8	2047	10.6667
135	ko05410 Hypertrophic cardiomyopathy (HCM)	75	1	10	1.33333
136	ko00052 Galactose metabolism	74	39	3220	52.7027
137	ko01210 2-Oxocarboxylic acid metabolism	74	44	2129	59.4595
138	ko03070 Bacterial secretion system	74	2	830	2.7027
139	ko04670 Leukocyte transendothelial migration	73	6	1275	8.21918
140	ko04713 Circadian entrainment	73	9	1512	12.3288
141	ko05100 Bacterial invasion of epithelial cells	73	3	640	4.10959
142	ko00400 Phenylalanine, tyrosine and tryptophan biosynthesis	72	33	3301	45.8333
143	ko04146 Peroxisome	72	46	2006	63.8889
144	ko04723 Retrograde endocannabinoid signaling	72	8	1802	11.1111
145	ko00310 Lysine degradation	71	37	5443	52.1127
146	ko00350 Tyrosine metabolism	70	42	2416	60
147	ko01212 Fatty acid metabolism	70	33	2374	47.1429
148	ko05215 Prostate cancer	70	11	3641	15.7143
149	ko04066 HIF-1 signaling pathway	69	15	3377	21.7391
150	ko04610 Complement and coagulation cascades	69	1	14	1.44928
151	ko00280 Valine, leucine and isoleucine degradation	68	40	1483	58.8235
152	ko05134 Legionellosis	68	2	190	2.94118
153	ko00627 Aminobenzoate degradation	67	33	2239	49.2537
154	ko00250 Alanine, aspartate and glutamate metabolism	66	44	1823	66.6667
155	ko01057 Biosynthesis of type II polyketide products	66	7	10087	10.6061
156	ko04911 Insulin secretion	66	7	1017	10.6061
157	ko05150 Staphylococcus aureus infection	66	2	32	3.0303
158	ko05222 Small cell lung cancer	66	11	753	16.6667
159	ko00380 Tryptophan metabolism	65	45	1364	69.2308
160	ko04750 Inflammatory mediator regulation of TRP channels	65	14	3388	21.5385
161	ko04915 Estrogen signaling pathway	65	10	2042	15.3846
162	ko04916 Melanogenesis	65	11	1738	16.9231
163	ko04972 Pancreatic secretion	65	11	2017	16.9231
164	ko05144 Malaria	65	1	382	1.53846
165	ko05323 Rheumatoid arthritis	65	2	1001	3.07692
166	ko00970 Aminoacyl-tRNA biosynthesis	64	26	3906	40.625
167	ko04012 ErbB signaling pathway	64	8	2734	12.5
168	ko04210 Apoptosis	64	7	1505	10.9375
169	ko05131 Shigellosis	64	4	839	6.25
170	ko00195 Photosynthesis	63	2	56	3.1746
171	ko04727 GABAergic synapse	63	11	1057	17.4603
172	ko05032 Morphine addiction	62	7	859	11.2903
173	ko00040 Pentose and glucuronate interconversions	61	35	1132	57.377
174	ko04350 TGF-beta signaling pathway	61	3	1181	4.91803
175	ko04260 Cardiac muscle contraction	60	3	239	5
176	ko04520 Adherens junction	60	6	5575	10
177	ko04912 GnRH signaling pathway	60	10	3679	16.6667
178	ko04970 Salivary secretion	60	12	1943	20
179	ko00760 Nicotinate and nicotinamide metabolism	59	28	1658	47.4576
180	ko03015 mRNA surveillance pathway	59	7	3362	11.8644
181	ko03030 DNA replication	59	6	28694	10.1695
182	ko03440 Homologous recombination	59	6	12850	10.1695
183	ko04115 p53 signaling pathway	59	7	1502	11.8644
184	ko04914 Progesterone-mediated oocyte maturation	59	9	2978	15.2542
185	ko04976 Bile secretion	59	14	1937	23.7288
186	ko05231 Choline metabolism in cancer	59	16	2644	27.1186
187	ko04917 Prolactin signaling pathway	58	9	907	15.5172
188	ko00020 Citrate cycle (TCA cycle)	57	22	1443	38.5965
189	ko05220 Chronic myeloid leukemia	57	7	1503	12.2807
190	ko00562 Inositol phosphate metabolism	56	39	1975	69.6429
191	ko00910 Nitrogen metabolism	56	25	1242	44.6429
192	ko03320 PPAR signaling pathway	56	20	653	35.7143
193	ko04540 Gap junction	56	12	3033	21.4286
194	ko04666 Fc gamma R-mediated phagocytosis	56	10	1810	17.8571
195	ko05140 Leishmaniasis	56	6	1246	10.7143
196	ko01054 Nonribosomal peptide structures	54	1	6	1.85185
197	ko01503 Cationic antimicrobial peptide (CAMP) resistance	54	0	0	0
198	ko03460 Fanconi anemia pathway	54	6	7366	11.1111
199	ko04662 B cell receptor signaling pathway	54	8	1874	14.8148
200	ko04622 RIG-I-like receptor signaling pathway	53	5	1342	9.43396
201	ko05212 Pancreatic cancer	53	6	1661	11.3208
202	ko04391 Hippo signaling pathway - fly	52	4	1302	7.69231
203	ko04922 Glucagon signaling pathway	52	0	0	0
204	ko04974 Protein digestion and absorption	52	1	23	1.92308
205	ko00071 Fatty acid degradation	51	27	2721	52.9412
206	ko00071 Fatty acid metabolism	51	0	2721	0
207	ko03020 RNA polymerase	51	1	24986	1.96078
208	ko04621 NOD-like receptor signaling pathway	51	3	823	5.88235
209	ko04623 Cytosolic DNA-sensing pathway	51	4	2055	7.84314
210	ko05211 Renal cell carcinoma	51	6	1125	11.7647
211	ko04920 Adipocytokine signaling pathway	50	11	1182	22
212	ko00513 Various types of N-glycan biosynthesis	49	24	7180	48.9796
213	ko05210 Colorectal cancer	49	3	406	6.12245
214	ko00361 Chlorocyclohexane and chlorobenzene degradation	48	18	420	37.5
215	ko00830 Retinol metabolism	48	25	2466	52.0833
216	ko05110 Vibrio cholerae infection	48	7	647	14.5833
217	ko00300 Lysine biosynthesis	47	35	449	74.4681
218	ko03420 Nucleotide excision repair	47	6	6795	12.766
219	ko04918 Thyroid hormone synthesis	47	9	1242	19.1489
220	ko04971 Gastric acid secretion	47	10	1144	21.2766
221	ko00140 Steroid hormone biosynthesis	46	30	1074	65.2174
222	ko05230 Central carbon metabolism in cancer	46	17	5825	36.9565
223	ko04075 Plant hormone signal transduction	45	6	2035	13.3333
224	ko05214 Glioma	45	10	2396	22.2222
225	ko05221 Acute myeloid leukemia	45	4	976	8.88889
226	ko05322 Systemic lupus erythematosus	45	0	0	0
227	ko00340 Histidine metabolism	44	28	899	63.6364
228	ko00590 Arachidonic acid metabolism	44	33	899	75
229	ko00624 Polycyclic aromatic hydrocarbon degradation	44	13	81	29.5455
230	ko00790 Folate biosynthesis	44	17	629	38.6364
231	ko03430 Mismatch repair	44	8	12567	18.1818
232	ko04664 Fc epsilon RI signaling pathway	44	5	1318	11.3636
233	ko05223 Non-small cell lung cancer	44	7	1936	15.9091
234	ko00410 beta-Alanine metabolism	43	34	995	79.0698
235	ko00510 N-Glycan biosynthesis	43	27	325	62.7907
236	ko00623 Toluene degradation	43	13	1177	30.2326
237	ko05014 Amyotrophic lateral sclerosis (ALS)	43	6	1448	13.9535
238	ko05031 Amphetamine addiction	43	8	2053	18.6047
239	ko05111 Vibrio cholerae pathogenic cycle	43	5	139	11.6279
240	ko04730 Long-term depression	42	10	1997	23.8095
241	ko05217 Basal cell carcinoma	42	1	14	2.38095
242	ko05218 Melanoma	42	7	2860	16.6667
243	ko00053 Ascorbate and aldarate metabolism	41	28	787	68.2927
244	ko00600 Sphingolipid metabolism	41	22	2510	53.6585
245	ko02040 Flagellar assembly	41	0	0	0
246	ko04011 MAPK signaling pathway - yeast	41	6	1140	14.6341
247	ko04612 Antigen processing and presentation	41	1	233	2.43902
248	ko04720 Long-term potentiation	41	8	2477	19.5122
249	ko05130 Pathogenic Escherichia coli infection	41	1	250	2.43902
250	ko00480 Glutathione metabolism	40	24	1749	60
251	ko00550 Peptidoglycan biosynthesis	40	14	4101	35
252	ko03410 Base excision repair	40	12	8158	30
253	ko04070 Phosphatidylinositol signaling system	40	28	1854	70
254	ko04340 Hedgehog signaling pathway	40	2	24	5
255	ko04721 Synaptic vesicle cycle	40	0	0	0
256	ko00401 Novobiocin biosynthesis	39	7	640	17.9487
257	ko03060 Protein export	39	1	2932	2.5641
258	ko04913 Ovarian steroidogenesis	39	16	1846	41.0256
259	ko05213 Endometrial cancer	39	7	978	17.9487
260	ko00540 Lipopolysaccharide biosynthesis	38	11	2699	28.9474
261	ko05030 Cocaine addiction	38	5	289	13.1579
262	ko05416 Viral myocarditis	38	1	375	2.63158
263	ko04150 mTOR signaling pathway	37	8	260	21.6216
264	ko04370 VEGF signaling pathway	37	11	2160	29.7297
265	ko04672 Intestinal immune network for IgA production	37	1	235	2.7027
266	ko04930 Type II diabetes mellitus	37	8	1305	21.6216
267	ko00523 Polyketide sugar unit biosynthesis	36	3	52	8.33333
268	ko00710 Carbon fixation in photosynthetic organisms	36	25	1862	69.4444
269	ko00770 Pantothenate and CoA biosynthesis	36	26	1124	72.2222
270	ko00522 Biosynthesis of 12-, 14- and 16-membered macrolides	35	6	1452	17.1429
271	ko03022 Basal transcription factors	35	2	0	5.71429
272	ko05143 African trypanosomiasis	35	3	136	8.57143
273	ko05204 Chemical carcinogenesis	35	25	2200	71.4286
274	ko05219 Bladder cancer	35	4	1533	11.4286
275	ko05340 Primary immunodeficiency	35	4	1324	11.4286
276	ko00440 Phosphonate and phosphinate metabolism	34	7	100	20.5882
277	ko00622 Xylene degradation	34	15	99	44.1176
278	ko04962 Vasopressin-regulated water reabsorption	33	2	256	6.06061
279	ko00061 Fatty acid biosynthesis	32	17	1520	53.125
280	ko00460 Cyanoamino acid metabolism	32	19	2001	59.375
281	ko00626 Naphthalene degradation	32	11	1496	34.375
282	ko00980 Metabolism of xenobiotics by cytochrome P450	32	21	2126	65.625
283	ko01051 Biosynthesis of ansamycins	32	4	2380	12.5
284	ko00514 Other types of O-glycan biosynthesis	31	14	5958	45.1613
285	ko00625 Chloroalkane and chloroalkene degradation	31	14	835	45.1613
286	ko04112 Cell cycle - Caulobacter	31	4	125	12.9032
287	ko00100 Steroid biosynthesis	30	25	257	83.3333
288	ko00670 One carbon pool by folate	30	23	661	76.6667
289	ko01055 Biosynthesis of vancomycin group antibiotics	30	1	30	3.33333
290	ko04978 Mineral absorption	30	4	91	13.3333
291	ko00565 Ether lipid metabolism	29	21	1497	72.4138
292	ko01040 Biosynthesis of unsaturated fatty acids	29	16	267	55.1724
293	ko01053 Biosynthesis of siderophore group nonribosomal peptides	29	6	576	20.6897
294	ko05020 Prion diseases	29	4	391	13.7931
295	ko00450 Selenocompound metabolism	28	19	714	67.8571
296	ko04330 Notch signaling pathway	28	4	791	14.2857
297	ko05216 Thyroid cancer	28	2	956	7.14286
298	ko04712 Circadian rhythm - plant	27	1	40	3.7037
299	ko04961 Endocrine and other factor-regulated calcium reabsorption	27	6	369	22.2222
300	ko00563 Glycosylphosphatidylinositol(GPI)-anchor biosynthesis	26	5	2155	19.2308
301	ko00740 Riboflavin metabolism	26	19	265	73.0769
302	ko02030 Bacterial chemotaxis	26	4	90	15.3846
303	ko04975 Fat digestion and absorption	26	9	1116	34.6154
304	ko00591 Linoleic acid metabolism	25	18	771	72
305	ko00601 Glycosphingolipid biosynthesis - lacto and neolacto series	25	11	3746	44
306	ko00621 Dioxin degradation	25	10	41	40
307	ko00660 C5-Branched dibasic acid metabolism	25	10	303	40
308	ko04950 Maturity onset diabetes of the young	25	2	181	8
309	ko05320 Autoimmune thyroid disease	25	1	3	4
310	ko00730 Thiamine metabolism	24	13	1398	54.1667
311	ko04140 Regulation of autophagy	24	2	108	8.33333
312	ko04320 Dorso-ventral axis formation	24	2	574	8.33333
313	ko04940 Type I diabetes mellitus	24	2	382	8.33333
314	ko04960 Aldosterone-regulated sodium reabsorption	24	5	718	20.8333
315	ko00062 Fatty acid elongation	23	8	378	34.7826
316	ko00430 Taurine and hypotaurine metabolism	23	12	143	52.1739
317	ko00592 alpha-Linolenic acid metabolism	23	19	872	82.6087
318	ko00750 Vitamin B6 metabolism	23	12	392	52.1739
319	ko00982 Drug metabolism - cytochrome P450	23	15	1942	65.2174
320	ko04742 Taste transduction	23	2	256	8.69565
321	ko00524 Butirosin and neomycin biosynthesis	22	3	135	13.6364
322	ko00534 Glycosaminoglycan biosynthesis - heparan sulfate / heparin	22	11	226	50
323	ko00643 Styrene degradation	22	9	128	40.9091
324	ko00983 Drug metabolism - other enzymes	22	25	709	113.636
325	ko04710 Circadian rhythm	22	2	169	9.09091
326	ko01502 Vancomycin resistance	21	7	460	33.3333
327	ko04122 Sulfur relay system	21	8	708	38.0952
328	ko04977 Vitamin digestion and absorption	21	6	194	28.5714
329	ko00253 Tetracycline biosynthesis	20	8	3041	40
330	ko05310 Asthma	20	1	556	5
331	ko00332 Carbapenem biosynthesis	19	8	2978	42.1053
332	ko00780 Biotin metabolism	19	16	441	84.2105
333	ko03450 Non-homologous end-joining	19	5	2794	26.3158
334	ko04973 Carbohydrate digestion and absorption	19	11	180	57.8947
335	ko00120 Primary bile acid biosynthesis	18	15	45	83.3333
336	ko00511 Other glycan degradation	18	9	1860	50
337	ko00521 Streptomycin biosynthesis	18	11	353	61.1111
338	ko00532 Glycosaminoglycan biosynthesis - chondroitin sulfate / dermatan sulfate	18	10	124	55.5556
339	ko04745 Phototransduction - fly	18	6	1263	33.3333
340	ko00290 Valine, leucine and isoleucine biosynthesis	17	10	738	58.8235
341	ko00633 Nitrotoluene degradation	17	7	105	41.1765
342	ko00642 Ethylbenzene degradation	17	5	77	29.4118
343	ko01056 Biosynthesis of type II polyketide backbone	17	2	2927	11.7647
344	ko04013 MAPK signaling pathway - fly	17	3	1693	17.6471
345	ko04744 Phototransduction	17	3	163	17.6471
346	ko04966 Collecting duct acid secretion	17	2	127	11.7647
347	ko00281 Geraniol degradation	16	10	298	62.5
348	ko00981 Insect hormone biosynthesis	16	4	929	25
349	ko00311 Penicillin and cephalosporin biosynthesis	15	9	40	60
350	ko00364 Fluorobenzoate degradation	15	10	13	66.6667
351	ko00531 Glycosaminoglycan degradation	15	11	654	73.3333
352	ko00903 Limonene and pinene degradation	15	16	264	106.667
353	ko04740 Olfactory transduction	15	4	179	26.6667
354	ko00533 Glycosaminoglycan biosynthesis - keratan sulfate	14	7	646	50
355	ko00603 Glycosphingolipid biosynthesis - globo series	14	9	1010	64.2857
356	ko00604 Glycosphingolipid biosynthesis - ganglio series	14	7	452	50
357	ko00930 Caprolactam degradation	14	11	341	78.5714
358	ko00984 Steroid degradation	14	7	32	50
359	ko04964 Proximal tubule bicarbonate reclamation	14	6	366	42.8571
360	ko00073 Cutin, suberine and wax biosynthesis	12	6	98	50
361	ko00254 Aflatoxin biosynthesis	12	2	0	16.6667
362	ko00791 Atrazine degradation	12	5	175	41.6667
363	ko00512 Mucin type O-Glycan biosynthesis	11	5	2156	45.4545
364	ko00905 Brassinosteroid biosynthesis	10	3	40	30
365	ko00231 Puromycin biosynthesis	9	1	28	11.1111
366	ko00072 Synthesis and degradation of ketone bodies	8	5	87	62.5
367	ko00363 Bisphenol degradation	8	9	1	112.5
368	ko04711 Circadian rhythm - fly	8	2	173	25
369	ko00471 D-Glutamine and D-glutamate metabolism	6	6	215	100
370	ko00331 Clavulanic acid biosynthesis	5	1	1	20
371	ko00473 D-Alanine metabolism	5	4	146	80
372	ko00472 D-Arginine and D-ornithine metabolism	4	2	5	50
373	ko00785 Lipoic acid metabolism	4	2	121	50
374	ko00312 beta-Lactam resistance	1	0	0	0
375	ko00351 DDT degradation	1	3	0	300
376	ko01130 Biosynthesis of antibiotics	1	0	0	0
	Total (with redundant entries)	28093	7037	1075673

## Sheet: Summary
Data S1b. KEGG cecondary metabolite pathway mapping of EST and RNA-seq according to different tissues.
KEGG Pathway	Total entry	EST			Combined			Leaf			Root
		Mapped entry		T count	Mapped entry		T count	Mapped entry		T count	Mapped entry		T count
ko01100 Metabolic pathways	2570	236	0.0918288	337	1107	0.430739	141795	757	0.294553	88458	666	0.259144	2629
ko01110 Biosynthesis of secondary metabolites	949	127	0.133825	103	474	0.499473	28643	366	0.385669	16999	327	0.344573	570
ko00909 Sesquiterpenoid and triterpenoid biosynthesis	66	1	0.0151515	0	12	0.181818	100	6	0.0909091	45	4	0.0606061	3
ko00130 Ubiquinone and other terpenoid-quinone biosynthesis	55	2	0.0363636	0	22	0.4	517	18	0.327273	307	10	0.181818	5
ko00900 Terpenoid backbone biosynthesis	53	11	0.207547	2	28	0.528302	1122	27	0.509434	678	22	0.415094	28
ko00906 Carotenoid biosynthesis	46	5	0.108696	2	13	0.282609	1259	11	0.23913	736	7	0.152174	26
ko00950 Isoquinoline alkaloid biosynthesis	42	2	0.047619	0	24	0.571429	919	17	0.404762	533	13	0.309524	5
ko00904 Diterpenoid biosynthesis	41	0	0	0	15	0.365854	107	8	0.195122	61	10	0.243902	5
ko00940 Phenylpropanoid biosynthesis	32	9	0.28125	4	23	0.71875	3753	22	0.6875	2132	14	0.4375	93
ko00960 Tropane, piperidine and pyridine alkaloid biosynthesis	25	1	0.04	0	18	0.72	1076	14	0.56	628	9	0.36	6
ko00902 Monoterpenoid biosynthesis	22	1	0.0454545	0	12	0.545455	54	5	0.227273	40	6	0.272727	0
ko00941 Flavonoid biosynthesis	19	7	0.368421	4	17	0.894737	893	16	0.842105	490	13	0.684211	15
ko00966 Glucosinolate biosynthesis	15	0	0	0	6	0.4	57	3	0.2	31	0	0	3
ko00942 Anthocyanin biosynthesis	14	1	0.0714286	0	4	0.285714	985	5	0.357143	581	1	0.0714286	23
ko00403 Indole diterpene alkaloid biosynthesis	13	0	0	0	3	0.230769	353	2	0.153846	243	0	0	6
ko00943 Isoflavonoid biosynthesis	13	0	0	0	5	0.384615	34	2	0.153846	21	2	0.153846	0
ko00945 Stilbenoid, diarylheptanoid and gingerol biosynthesis	13	3	0.230769	0	6	0.461538	629	4	0.307692	346	3	0.230769	14
ko00944 Flavone and flavonol biosynthesis	12	1	0.0833333	1	10	0.833333	680	10	0.833333	399	5	0.416667	11
ko00901 Indole alkaloid biosynthesis	10	0	0	0	8	0.8	82	5	0.5	49	4	0.4	3
ko00232 Caffeine metabolism	9	1	0.111111	0	6	0.666667	106	4	0.444444	67	4	0.444444	1
ko00402 Benzoxazinoid biosynthesis	9	0	0	0	2	0.222222	12	1	0.111111	5	1	0.111111	0
ko00908 Zeatin biosynthesis	8	0	0	2	6	0.75	668	6	0.75	404	4	0.5	11
ko00965 Betalain biosynthesis	7	0	0	0	5	0.714286	1606	3	0.428571	955	2	0.285714	30
ko01058 Acridone alkaloid biosynthesis	2	0	0	0	1	0.5	4	1	0.5	2	0	0	0

## Sheet: PSM-mapped
Data S1c. Mapped enzymes related to secondary metabolite biosynthesis.
EC Number	Enzyme Name	GO Identifier	GO Description	Transcript Count
1.1.1.1	alcohol dehydrogenase	GO:0004025	alcohol dehydrogenase activity, iron-dependent	132
1.1.1.133	dTDP-4-dehydrorhamnose reductase	GO:0008831	dTDP-4-dehydrorhamnose reductase activity	20
1.1.1.144	perillyl-alcohol dehydrogenase	GO:0018457	perillyl-alcohol dehydrogenase activity	1
1.1.1.169	2-dehydropantoate 2-reductase	GO:0008677	2-dehydropantoate 2-reductase activity	2
1.1.1.178	3-hydroxy-2-methylbutyryl-CoA dehydrogenase	GO:0047015	3-hydroxy-2-methylbutyryl-CoA dehydrogenase activity	1
1.1.1.18	inositol 2-dehydrogenase	GO:0050112	inositol 2-dehydrogenase activity	11
1.1.1.195	cinnamyl-alcohol dehydrogenase	GO:0052747	sinapyl alcohol dehydrogenase activity	94
1.1.1.2	alcohol dehydrogenase (NADP+)	GO:0008106	alcohol dehydrogenase (NADP+) activity	20
1.1.1.205	IMP dehydrogenase	GO:0003938	IMP dehydrogenase activity	12
1.1.1.206	tropinone reductase I	GO:0050356	tropine dehydrogenase activity	4
1.1.1.208	(+)-neomenthol dehydrogenase	GO:0047501	(+)-neomenthol dehydrogenase activity	18
1.1.1.211	long-chain-3-hydroxyacyl-CoA dehydrogenase	GO:0016509	long-chain-3-hydroxyacyl-CoA dehydrogenase activity	4
1.1.1.219	dihydrokaempferol 4-reductase	GO:0045552	dihydrokaempferol 4-reductase activity	44
1.1.1.22	UDP-glucose 6-dehydrogenase	GO:0003979	UDP-glucose 6-dehydrogenase activity	22
1.1.1.23	histidinol dehydrogenase	GO:0004399	histidinol dehydrogenase activity	38
1.1.1.234	flavanone 4-reductase	GO:0047890	flavanone 4-reductase activity	7
1.1.1.237	hydroxyphenylpyruvate reductase	GO:0047995	hydroxyphenylpyruvate reductase activity	8
1.1.1.243	carveol dehydrogenase	GO:0018459	carveol dehydrogenase activity	1
1.1.1.248	salutaridine reductase (NADPH)	GO:0047037	salutaridine reductase (NADPH) activity	8
1.1.1.267	1-deoxy-D-xylulose-5-phosphate reductoisomerase	GO:0030604	1-deoxy-D-xylulose-5-phosphate reductoisomerase activity	94
1.1.1.27	L-lactate dehydrogenase	GO:0004459	L-lactate dehydrogenase activity	26
1.1.1.282	quinate/shikimate dehydrogenase	GO:0052734	shikimate 3-dehydrogenase (NAD+) activity	176
1.1.1.284	S-(hydroxymethyl)glutathione dehydrogenase	GO:0051903	S-(hydroxymethyl)glutathione dehydrogenase activity	19
1.1.1.288	xanthoxin dehydrogenase	GO:0010301	xanthoxin dehydrogenase activity	1
1.1.1.29	glycerate dehydrogenase	GO:0008465	glycerate dehydrogenase activity	8
1.1.1.294	chlorophyll(ide) b reductase	GO:0034256	chlorophyll(ide) b reductase activity	22
1.1.1.3	homoserine dehydrogenase	GO:0004412	homoserine dehydrogenase activity	19
1.1.1.34	hydroxymethylglutaryl-CoA reductase (NADPH)	GO:0004420	hydroxymethylglutaryl-CoA reductase (NADPH) activity	39
1.1.1.35	3-hydroxyacyl-CoA dehydrogenase	GO:0003857	3-hydroxyacyl-CoA dehydrogenase activity	100
1.1.1.37	malate dehydrogenase	GO:0030060	L-malate dehydrogenase activity	63
1.1.1.41	isocitrate dehydrogenase (NAD+)	GO:0004449	isocitrate dehydrogenase (NAD+) activity	23
1.1.1.42	isocitrate dehydrogenase (NADP+)	GO:0004450	isocitrate dehydrogenase (NADP+) activity	46
1.1.1.44	phosphogluconate dehydrogenase (NADP+-dependent, decarboxylating)	GO:0004616	phosphogluconate dehydrogenase (decarboxylating) activity	72
1.1.1.49	glucose-6-phosphate dehydrogenase (NADP+)	GO:0004345	glucose-6-phosphate dehydrogenase activity	84
1.1.1.62	17beta-estradiol 17-dehydrogenase	GO:0004303	estradiol 17-beta-dehydrogenase activity	9
1.1.1.85	3-isopropylmalate dehydrogenase	GO:0003862	3-isopropylmalate dehydrogenase activity	56
1.1.1.86	ketol-acid reductoisomerase	GO:0004455	ketol-acid reductoisomerase activity	62
1.1.3.15	(S)-2-hydroxy-acid oxidase	GO:0052854	medium-chain-(S)-2-hydroxy-acid oxidase activity	216
1.1.5.2	glucose 1-dehydrogenase (PQQ, quinone)	GO:0008876	quinoprotein glucose dehydrogenase activity	1
1.1.5.4	malate dehydrogenase (quinone)	GO:0052589	malate dehydrogenase (menaquinone) activity	62
1.10.3.1	catechol oxidase	GO:0004097	catechol oxidase activity	6
1.10.99.3	violaxanthin de-epoxidase	GO:0046422	violaxanthin de-epoxidase activity	14
1.11.1.15	peroxiredoxin	GO:0051920	peroxiredoxin activity	87
1.11.1.6	catalase	GO:0004096	catalase activity	112
1.11.1.7	peroxidase	GO:0004601	peroxidase activity	556
1.13.11.51	9-cis-epoxycarotenoid dioxygenase	GO:0045549	9-cis-epoxycarotenoid dioxygenase activity	13
1.14.-.-				2
1.14.11.11	hyoscyamine (6S)-dioxygenase	GO:0047998	hyoscyamine (6S)-dioxygenase activity	3
1.14.11.15	gibberellin 3beta-dioxygenase	GO:0016707	gibberellin 3-beta-dioxygenase activity	5
1.14.11.19	leucocyanidin oxygenase	GO:0050589	leucocyanidin oxygenase activity	18
1.14.11.22	flavone synthase	GO:0033759	flavone synthase activity	2
1.14.11.23	flavonol synthase	GO:0045431	flavonol synthase activity	21
1.14.11.26	deacetoxycephalosporin-C hydroxylase	GO:0045442	deacetoxycephalosporin-C hydroxylase activity	1
1.14.11.9	flavanone 3-dioxygenase	GO:0045486	naringenin 3-dioxygenase activity	42
1.14.13.-				7
1.14.13.104	(+)-menthofuran synthase	GO:0052582	(+)-menthofuran synthase activity	1
1.14.13.11	trans-cinnamate 4-monooxygenase	GO:0016710	trans-cinnamate 4-monooxygenase activity	25
1.14.13.122	chlorophyllide-a oxygenase	GO:0010277	chlorophyllide a oxygenase [overall] activity	33
1.14.13.132	squalene monooxygenase	GO:0004506	squalene monooxygenase activity	21
1.14.13.145	ent-cassa-12,15-diene 11-hydroxylase	GO:0036202	ent-cassa-12,15-diene 11-hydroxylase activity	4
1.14.13.21	flavonoid 3'-monooxygenase	GO:0016711	flavonoid 3'-monooxygenase activity	28
1.14.13.39	nitric-oxide synthase (NADPH dependent)	GO:0051767	nitric-oxide synthase biosynthetic process	15
1.14.13.41	Dihydroflavonol-4-reductase; Short=DFR; AltName: Full=Dihydrokaempferol 4-reductase	GO:0050370	tyrosine N-monooxygenase activity	1
1.14.13.48	(S)-limonene 6-monooxygenase	GO:0018675	(S)-limonene 6-monooxygenase activity	5
1.14.13.49	(S)-limonene 7-monooxygenase	GO:0018676	(S)-limonene 7-monooxygenase activity	4
1.14.13.68	4-hydroxyphenylacetaldehyde oxime monooxygenase	GO:0050592	4-hydroxyphenylacetaldehyde oxime monooxygenase activity	4
1.14.13.70	sterol 14alpha-demethylase	GO:0008398	sterol 14-demethylase activity	16
1.14.13.71	N-methylcoclaurine 3'-monooxygenase	GO:0050593	N-methylcoclaurine 3'-monooxygenase activity	4
1.14.13.77	taxane 13alpha-hydroxylase	GO:0050598	taxane 13-alpha-hydroxylase activity	2
1.14.13.78	ent-kaurene oxidase	GO:0052617	ent-kaur-16-en-19-al oxidase activity	28
1.14.13.81	magnesium-protoporphyrin IX monomethyl ester (oxidative) cyclase	GO:0048529	magnesium-protoporphyrin IX monomethyl ester (oxidative) cyclase activity	11
1.14.13.88	flavanoid 3',5'-hydroxylase	GO:0033772	flavonoid 3',5'-hydroxylase activity	25
1.14.13.89	isoflavone 2'-hydroxylase	GO:0033773	isoflavone 2'-hydroxylase activity	8
1.14.13.90	zeaxanthin epoxidase	GO:0052663	antheraxanthin epoxidase activity	111
1.14.14.-				3
1.14.17.4	aminocyclopropanecarboxylate oxidase	GO:0009815	1-aminocyclopropane-1-carboxylate oxidase activity	42
1.14.18.1	tyrosinase	GO:0004503	monophenol monooxygenase activity	15
1.14.18.2	CMP-N-acetylneuraminate monooxygenase	GO:0030338	CMP-N-acetylneuraminate monooxygenase activity	5
1.14.20.1	deacetoxycephalosporin-C synthase	GO:0050599	deacetoxycephalosporin-C synthase activity	2
1.14.21.-				1
1.14.21.1	(S)-stylopine synthase	GO:0047052	(S)-stylopine synthase activity	2
1.14.21.6	lathosterol oxidase	GO:0050046	lathosterol oxidase activity	6
1.14.99.22	ecdysone 20-monooxygenase	GO:0004501	ecdysone 20-monooxygenase activity	3
1.17.1.2	4-hydroxy-3-methylbut-2-enyl diphosphate reductase	GO:0051745	4-hydroxy-3-methylbut-2-en-1-yl diphosphate reductase activity	76
1.17.1.3	leucoanthocyanidin reductase	GO:0033788	leucoanthocyanidin reductase activity	8
1.17.1.4	xanthine dehydrogenase	GO:0004854	xanthine dehydrogenase activity	32
1.17.1.8	4-hydroxy-tetrahydrodipicolinate reductase	GO:0008839	4-hydroxy-tetrahydrodipicolinate reductase	59
1.17.3.2	xanthine oxidase	GO:0004855	xanthine oxidase activity	8
1.17.7.1	(E)-4-hydroxy-3-methylbut-2-enyl-diphosphate synthase	GO:0046429	4-hydroxy-3-methylbut-2-en-1-yl diphosphate synthase activity	90
1.2.1.-				42
1.2.1.10	acetaldehyde dehydrogenase (acetylating)	GO:0008774	acetaldehyde dehydrogenase (acetylating) activity	8
1.2.1.11	aspartate-semialdehyde dehydrogenase	GO:0004073	aspartate-semialdehyde dehydrogenase activity	13
1.2.1.12	glyceraldehyde-3-phosphate dehydrogenase (phosphorylating)	GO:0008943	glyceraldehyde-3-phosphate dehydrogenase activity	90
1.2.1.3	aldehyde dehydrogenase (NAD+)	GO:0004029	aldehyde dehydrogenase (NAD) activity	160
1.2.1.31	L-aminoadipate-semialdehyde dehydrogenase	GO:0005949	aminoadipate-semialdehyde dehydrogenase complex	5
1.2.1.38	N-acetyl-gamma-glutamyl-phosphate reductase	GO:0003942	N-acetyl-gamma-glutamyl-phosphate reductase activity	83
1.2.1.41	glutamate-5-semialdehyde dehydrogenase	GO:0004350	glutamate-5-semialdehyde dehydrogenase activity	52
1.2.1.44	cinnamoyl-CoA reductase	GO:0016621	cinnamoyl-CoA reductase activity	63
1.2.1.47	4-trimethylammoniobutyraldehyde dehydrogenase	GO:0047105	4-trimethylammoniobutyraldehyde dehydrogenase activity	2
1.2.1.59	glyceraldehyde-3-phosphate dehydrogenase (NAD(P)+) (phosphorylating)	GO:0043891	glyceraldehyde-3-phosphate dehydrogenase (NAD(P)+) (phosphorylating) activity	9
1.2.1.70	glutamyl-tRNA reductase	GO:0008883	glutamyl-tRNA reductase activity	71
1.2.1.8	betaine-aldehyde dehydrogenase	GO:0008802	betaine-aldehyde dehydrogenase activity	19
1.2.3.14	abscisic-aldehyde oxidase	GO:0010293	abscisic aldehyde oxidase activity	19
1.2.4.1	pyruvate dehydrogenase (acetyl-transferring)	GO:0004739	pyruvate dehydrogenase (acetyl-transferring) activity	66
1.2.4.2	oxoglutarate dehydrogenase (succinyl-transferring)	GO:0004591	oxoglutarate dehydrogenase (succinyl-transferring) activity	43
1.2.4.4	3-methyl-2-oxobutanoate dehydrogenase (2-methylpropanoyl-transferring)	GO:0017086	3-methyl-2-oxobutanoate dehydrogenase (lipoamide) complex	58
1.21.3.1	isopenicillin-N synthase	GO:0016216	isopenicillin-N synthase activity	3
1.21.3.3	reticuline oxidase	GO:0050468	reticuline oxidase activity	1
1.3.1.12	prephenate dehydrogenase	GO:0008977	prephenate dehydrogenase activity	46
1.3.1.13	prephenate dehydrogenase (NADP+)	GO:0004665	prephenate dehydrogenase (NADP+) activity	46
1.3.1.21	7-dehydrocholesterol reductase	GO:0047598	7-dehydrocholesterol reductase activity	10
1.3.1.22	3-oxo-5alpha-steroid 4-dehydrogenase (NADP+)	GO:0047751	cholestenone 5-alpha-reductase activity	16
1.3.1.28	2,3-dihydro-2,3-dihydroxybenzoate dehydrogenase	GO:0008667	2,3-dihydro-2,3-dihydroxybenzoate dehydrogenase activity	5
1.3.1.33	protochlorophyllide reductase	GO:0016630	protochlorophyllide reductase activity	22
1.3.1.70	DELTA14-sterol reductase	GO:0050613	delta14-sterol reductase activity	10
1.3.1.72	DELTA24-sterol reductase	GO:0050614	delta24-sterol reductase activity	9
1.3.1.76	precorrin-2 dehydrogenase	GO:0043115	precorrin-2 dehydrogenase activity	26
1.3.1.77	anthocyanidin reductase	GO:0033729	anthocyanidin reductase activity	41
1.3.1.81	(+)-pulegone reductase	GO:0052580	(+)-pulegone reductase, (-)-menthone as substrate, activity	6
1.3.2.3	L-galactonolactone dehydrogenase	GO:0016633	galactonolactone dehydrogenase activity	7
1.3.3.3	coproporphyrinogen oxidase	GO:0004109	coproporphyrinogen oxidase activity	41
1.3.3.4	protoporphyrinogen oxidase	GO:0070818	protoporphyrinogen oxidase activity	27
1.3.3.9	secologanin synthase	GO:0050616	secologanin synthase activity	9
1.3.5.1	succinate dehydrogenase (quinone)	GO:0008177	succinate dehydrogenase (ubiquinone) activity	41
1.3.5.6	9,9'-dicis-zeta-carotene desaturase	GO:0052889	9,9'-di-cis-zeta-carotene desaturation to 7,9,7',9'-tetra-cis-lycopene	57
1.3.8.1	short-chain acyl-CoA dehydrogenase	GO:0004085	butyryl-CoA dehydrogenase activity	6
1.3.99.-				17
1.3.99.12	2-methylacyl-CoA dehydrogenase	GO:0003853	2-methylacyl-CoA dehydrogenase activity	10
1.3.99.22	coproporphyrinogen dehydrogenase	GO:0051989	coproporphyrinogen dehydrogenase activity	5
1.4.1.13	glutamate synthase (NADPH)	GO:0045181	glutamate synthase activity, NAD(P)H as acceptor	8
1.4.1.14	glutamate synthase (NADH)	GO:0045181	glutamate synthase activity, NAD(P)H as acceptor	32
1.4.1.16	diaminopimelate dehydrogenase	GO:0047850	diaminopimelate dehydrogenase activity	3
1.4.3.21	primary-amine oxidase	GO:0052596	phenethylamine:oxygen oxidoreductase (deaminating) activity	223
1.5.1.10	saccharopine dehydrogenase (NADP+, L-glutamate-forming)	GO:0004755	saccharopine dehydrogenase (NADP+, L-glutamate-forming) activity	2
1.5.1.2	pyrroline-5-carboxylate reductase	GO:0004735	pyrroline-5-carboxylate reductase activity	14
1.5.1.7	saccharopine dehydrogenase (NAD+, L-lysine-forming)	GO:0004754	saccharopine dehydrogenase (NAD+, L-lysine-forming) activity	1
1.5.1.8	saccharopine dehydrogenase (NADP+, L-lysine-forming)	GO:0047130	saccharopine dehydrogenase (NADP+, L-lysine-forming) activity	21
1.5.1.9	saccharopine dehydrogenase (NAD+, L-glutamate-forming)	GO:0047131	saccharopine dehydrogenase (NAD+, L-glutamate-forming) activity	21
1.6.2.2	cytochrome-b5 reductase	GO:0004128	cytochrome-b5 reductase activity, acting on NAD(P)H	52
1.6.5.2	NAD(P)H dehydrogenase (quinone)	GO:0003955	NAD(P)H dehydrogenase (quinone) activity	38
1.8.1.4	dihydrolipoyl dehydrogenase	GO:0004148	dihydrolipoyl dehydrogenase activity	10
2.1.1.-				914
2.1.1.101	macrocin O-methyltransferase	GO:0030769	macrocin O-methyltransferase activity	2
2.1.1.102	demethylmacrocin O-methyltransferase	GO:0030770	demethylmacrocin O-methyltransferase activity	2
2.1.1.104	caffeoyl-CoA O-methyltransferase	GO:0042409	caffeoyl-CoA O-methyltransferase activity	61
2.1.1.107	uroporphyrinogen-III C-methyltransferase	GO:0004851	uroporphyrin-III C-methyltransferase activity	24
2.1.1.11	magnesium protoporphyrin IX methyltransferase	GO:0046406	magnesium protoporphyrin IX methyltransferase activity	2
2.1.1.111	anthranilate N-methyltransferase	GO:0030774	anthranilate N-methyltransferase activity	4
2.1.1.114	polyprenyldihydroxybenzoate methyltransferase	GO:0004395	hexaprenyldihydroxybenzoate methyltransferase activity	16
2.1.1.117	(S)-scoulerine 9-O-methyltransferase	GO:0030777	(S)-scoulerine 9-O-methyltransferase activity	2
2.1.1.122	(S)-tetrahydroprotoberberine N-methyltransferase	GO:0030782	(S)-tetrahydroprotoberberine N-methyltransferase activity	1
2.1.1.13	methionine synthase	GO:0008705	methionine synthase activity	29
2.1.1.14	5-methyltetrahydropteroyltriglutamate-homocysteine S-methyltransferase	GO:0003871	5-methyltetrahydropteroyltriglutamate-homocysteine S-methyltransferase activity	105
2.1.1.140	(S)-coclaurine-N-methyltransferase	GO:0030794	(S)-coclaurine-N-methyltransferase activity	7
2.1.1.143	24-methylenesterol C-methyltransferase	GO:0030797	24-methylenesterol C-methyltransferase activity	4
2.1.1.41	sterol 24-C-methyltransferase	GO:0003838	sterol 24-C-methyltransferase activity	27
2.1.1.64	3-demethylubiquinol 3-O-methyltransferase	GO:0061542	3-demethylubiquinone-n 3-O-methyltransferase activity	35
2.1.1.68	caffeate O-methyltransferase	GO:0047763	caffeate O-methyltransferase activity	40
2.1.1.95	tocopherol O-methyltransferase	GO:0050342	tocopherol O-methyltransferase activity	10
2.1.2.1	glycine hydroxymethyltransferase	GO:0080114	positive regulation of glycine hydroxymethyltransferase activity	123
2.1.2.11	3-methyl-2-oxobutanoate hydroxymethyltransferase	GO:0003864	3-methyl-2-oxobutanoate hydroxymethyltransferase activity	49
2.1.2.2	phosphoribosylglycinamide formyltransferase	GO:0004644	phosphoribosylglycinamide formyltransferase activity	24
2.1.2.3	phosphoribosylaminoimidazolecarboxamide formyltransferase	GO:0004643	phosphoribosylaminoimidazolecarboxamide formyltransferase activity	45
2.1.3.3	ornithine carbamoyltransferase	GO:0009348	ornithine carbamoyltransferase complex	47
2.2.1.1	transketolase	GO:0004802	transketolase activity	27
2.2.1.2	transaldolase	GO:0004801	sedoheptulose-7-phosphate:D-glyceraldehyde-3-phosphate glyceronetransferase activity	48
2.2.1.6	acetolactate synthase	GO:0003984	acetolactate synthase activity	31
2.2.1.7	1-deoxy-D-xylulose-5-phosphate synthase	GO:0008661	1-deoxy-D-xylulose-5-phosphate synthase activity	83
2.2.1.9	2-succinyl-5-enolpyruvyl-6-hydroxy-3-cyclohexene-1-carboxylic-acid synthase	GO:0070204	2-succinyl-5-enolpyruvyl-6-hydroxy-3-cyclohexene-1-carboxylic-acid synthase activity	59
2.3.1.-				426
2.3.1.1	amino-acid N-acetyltransferase	GO:0004042	acetyl-CoA:L-glutamate N-acetyltransferase activity	76
2.3.1.12	dihydrolipoyllysine-residue acetyltransferase	GO:0030523	dihydrolipoamide S-acyltransferase activity	52
2.3.1.133	shikimate O-hydroxycinnamoyltransferase	GO:0047172	shikimate O-hydroxycinnamoyltransferase activity	16
2.3.1.157	glucosamine-1-phosphate N-acetyltransferase	GO:0019134	glucosamine-1-phosphate N-acetyltransferase activity	48
2.3.1.16	acetyl-CoA C-acyltransferase	GO:0003988	acetyl-CoA C-acyltransferase activity	54
2.3.1.160	vinorine synthase	GO:0050636	vinorine synthase activity	3
2.3.1.167	10-deacetylbaccatin III 10-O-acetyltransferase	GO:0050643	10-deacetylbaccatin III 10-O-acetyltransferase activity	3
2.3.1.168	dihydrolipoyllysine-residue (2-methylpropanoyl)transferase	GO:0043754	dihydrolipoyllysine-residue (2-methylpropanoyl)transferase activity	11
2.3.1.175	deacetylcephalosporin-C acetyltransferase	GO:0033813	deacetylcephalosporin-C acetyltransferase activity	2
2.3.1.35	glutamate N-acetyltransferase	GO:0004358	glutamate N-acetyltransferase activity	48
2.3.1.4	glucosamine-phosphate N-acetyltransferase	GO:0004343	glucosamine 6-phosphate N-acetyltransferase activity	5
2.3.1.46	homoserine O-succinyltransferase	GO:0008899	homoserine O-succinyltransferase activity	11
2.3.1.5	arylamine N-acetyltransferase	GO:0004060	arylamine N-acetyltransferase activity	7
2.3.1.61	dihydrolipoyllysine-residue succinyltransferase	GO:0009354	dihydrolipoamide S-succinyltransferase complex	14
2.3.1.74	naringenin-chalcone synthase	GO:0016210	naringenin-chalcone synthase activity	40
2.3.1.89	tetrahydrodipicolinate N-acetyltransferase	GO:0047200	tetrahydrodipicolinate N-acetyltransferase activity	5
2.3.1.9	acetyl-CoA C-acetyltransferase	GO:0003985	acetyl-CoA C-acetyltransferase activity	25
2.3.1.94	6-deoxyerythronolide-B synthase	GO:0047879	erythronolide synthase activity	7
2.3.1.95	trihydroxystilbene synthase	GO:0050350	trihydroxystilbene synthase activity	2
2.3.3.1	citrate (Si)-synthase	GO:0004108	citrate (Si)-synthase activity	31
2.3.3.10	hydroxymethylglutaryl-CoA synthase	GO:0004421	hydroxymethylglutaryl-CoA synthase activity	25
2.3.3.13	2-isopropylmalate synthase	GO:0003852	2-isopropylmalate synthase activity	78
2.3.3.8	ATP citrate synthase	GO:0003878	ATP citrate synthase activity	98
2.4.1.-				525
2.4.1.1	glycogen phosphorylase	GO:0008184	glycogen phosphorylase activity	27
2.4.1.11	glycogen(starch) synthase	GO:0004373	glycogen (starch) synthase activity	8
2.4.1.115	anthocyanidin 3-O-glucosyltransferase	GO:0047213	anthocyanidin 3-O-glucosyltransferase activity	33
2.4.1.18	1,4-alpha-glucan branching enzyme	GO:0003844	1,4-alpha-glucan branching enzyme activity	105
2.4.1.195	N-hydroxythioamide S-beta-glucosyltransferase	GO:0047251	thiohydroximate beta-D-glucosyltransferase activity	2
2.4.1.21	starch synthase (glycosyl-transferring)	GO:0009011	starch synthase activity	194
2.4.1.43	polygalacturonate 4-alpha-galacturonosyltransferase	GO:0047262	polygalacturonate 4-alpha-galacturonosyltransferase activity	176
2.4.1.91	flavonol 3-O-glucosyltransferase	GO:0047893	flavonol 3-O-glucosyltransferase activity	29
2.4.2.-				48
2.4.2.1	purine-nucleoside phosphorylase	GO:0004731	purine-nucleoside phosphorylase activity	10
2.4.2.14	amidophosphoribosyltransferase	GO:0004044	amidophosphoribosyltransferase activity	15
2.4.2.17	ATP phosphoribosyltransferase	GO:0003879	ATP phosphoribosyltransferase activity	60
2.4.2.18	anthranilate phosphoribosyltransferase	GO:0004048	anthranilate phosphoribosyltransferase activity	56
2.4.2.22	xanthine phosphoribosyltransferase	GO:0000310	xanthine phosphoribosyltransferase activity	10
2.4.2.8	hypoxanthine phosphoribosyltransferase	GO:0052657	guanine phosphoribosyltransferase activity	22
2.5.1.-				155
2.5.1.1	dimethylallyltranstransferase	GO:0004161	dimethylallyltranstransferase activity	81
2.5.1.10	(2E,6E)-farnesyl diphosphate synthase	GO:0004337	geranyltranstransferase activity	78
2.5.1.19	3-phosphoshikimate 1-carboxyvinyltransferase	GO:0003866	3-phosphoshikimate 1-carboxyvinyltransferase activity	140
2.5.1.21	squalene synthase	GO:0051996	squalene synthase activity	39
2.5.1.29	geranylgeranyl diphosphate synthase	GO:0004311	farnesyltranstransferase activity	22
2.5.1.31	ditrans,polycis-undecaprenyl-diphosphate synthase [(2E,6E)-farnesyl-diphosphate specific]	GO:0008834	di-trans,poly-cis-decaprenylcistransferase activity	7
2.5.1.32	15-cis-phytoene synthase	GO:0016767	geranylgeranyl-diphosphate geranylgeranyltransferase activity	24
2.5.1.39	4-hydroxybenzoate polyprenyltransferase	GO:0047293	4-hydroxybenzoate nonaprenyltransferase activity	14
2.5.1.48	cystathionine gamma-synthase	GO:0003962	cystathionine gamma-synthase activity	32
2.5.1.54	3-deoxy-7-phosphoheptulonate synthase	GO:0003849	3-deoxy-7-phosphoheptulonate synthase activity	70
2.5.1.56	N-acetylneuraminate synthase	GO:0050462	N-acetylneuraminate synthase activity	1
2.5.1.57	N-acylneuraminate-9-phosphate synthase	GO:0047444	N-acylneuraminate-9-phosphate synthase activity	1
2.5.1.6	methionine adenosyltransferase	GO:0048270	methionine adenosyltransferase regulator activity	87
2.5.1.61	hydroxymethylbilane synthase	GO:0004418	hydroxymethylbilane synthase activity	37
2.5.1.62	chlorophyll synthase	GO:0046408	chlorophyll synthetase activity	13
2.5.1.75	tRNA dimethylallyltransferase	GO:0052381	tRNA dimethylallyltransferase activity	79
2.5.1.83	hexaprenyl-diphosphate synthase [(2E,6E)-farnesyl-diphosphate specific]	GO:0036423	hexaprenyl-diphosphate synthase ((2E,6E)-farnesyl-diphosphate specific) activity	1
2.5.1.84	all-trans-nonaprenyl-diphosphate synthase [geranyl-diphosphate specific]	GO:0052923	all-trans-nonaprenyl-diphosphate synthase (geranyl-diphosphate specific) activity	8
2.5.1.85	all-trans-nonaprenyl diphosphate synthase [geranylgeranyl-diphosphate specific]	GO:0052924	all-trans-nonaprenyl-diphosphate synthase (geranylgeranyl-diphosphate specific) activity	41
2.6.1.-				3
2.6.1.1	aspartate transaminase	GO:0080130	L-phenylalanine:2-oxoglutarate aminotransferase activity	93
2.6.1.11	acetylornithine transaminase	GO:0003992	N2-acetyl-L-ornithine:2-oxoglutarate 5-aminotransferase activity	20
2.6.1.13	ornithine aminotransferase	GO:0004587	ornithine-oxo-acid transaminase activity	12
2.6.1.16	glutamine-fructose-6-phosphate transaminase (isomerizing)	GO:0004360	glutamine-fructose-6-phosphate transaminase (isomerizing) activity	46
2.6.1.17	succinyldiaminopimelate transaminase	GO:0009016	succinyldiaminopimelate transaminase activity	3
2.6.1.2	alanine transaminase	GO:0004021	L-alanine:2-oxoglutarate aminotransferase activity	57
2.6.1.27	tryptophan transaminase	GO:0050362	L-tryptophan:2-oxoglutarate aminotransferase activity	10
2.6.1.28	tryptophan-phenylpyruvate transaminase	GO:0080097	L-tryptophan:pyruvate aminotransferase activity	10
2.6.1.4	glycine transaminase	GO:0047958	glycine:2-oxoglutarate aminotransferase activity	20
2.6.1.42	branched-chain-amino-acid transaminase	GO:0052656	L-isoleucine transaminase activity	214
2.6.1.44	alanine-glyoxylate transaminase	GO:0008453	alanine-glyoxylate transaminase activity	80
2.6.1.45	serine-glyoxylate transaminase	GO:0050281	serine-glyoxylate transaminase activity	47
2.6.1.5	tyrosine transaminase	GO:0080130	L-phenylalanine:2-oxoglutarate aminotransferase activity	25
2.6.1.50	glutamine-scyllo-inositol transaminase	GO:0080100	L-glutamine:2-oxoglutarate aminotransferase activity	1
2.6.1.51	serine-pyruvate transaminase	GO:0005969	serine-pyruvate aminotransferase complex	50
2.6.1.57	aromatic-amino-acid transaminase	GO:0080130	L-phenylalanine:2-oxoglutarate aminotransferase activity	15
2.6.1.58	phenylalanine(histidine) transaminase	GO:0080098	L-tyrosine:pyruvate aminotransferase activity	2
2.6.1.83	LL-diaminopimelate aminotransferase	GO:0010285	L,L-diaminopimelate aminotransferase activity	34
2.6.1.9	histidinol-phosphate transaminase	GO:0080130	L-phenylalanine:2-oxoglutarate aminotransferase activity	229
2.7.1.1	hexokinase	GO:0004396	hexokinase activity	65
2.7.1.11	6-phosphofructokinase	GO:0003872	6-phosphofructokinase activity	32
2.7.1.12	gluconokinase	GO:0046316	gluconokinase activity	9
2.7.1.146	ADP-specific phosphofructokinase	GO:0043844	ADP-specific phosphofructokinase activity	1
2.7.1.147	ADP-specific glucokinase	GO:0043843	ADP-specific glucokinase activity	2
2.7.1.148	4-(cytidine 5'-diphospho)-2-C-methyl-D-erythritol kinase	GO:0050515	4-(cytidine 5'-diphospho)-2-C-methyl-D-erythritol kinase activity	67
2.7.1.2	glucokinase	GO:0004340	glucokinase activity	34
2.7.1.31	glycerate 3-kinase	GO:0008887	glycerate kinase activity	13
2.7.1.36	mevalonate kinase	GO:0004496	mevalonate kinase activity	13
2.7.1.40	pyruvate kinase	GO:0004743	pyruvate kinase activity	147
2.7.1.46	L-arabinokinase	GO:0009702	L-arabinokinase activity	13
2.7.1.59	N-acetylglucosamine kinase	GO:0045127	N-acetylglucosamine kinase activity	9
2.7.1.6	galactokinase	GO:0004335	galactokinase activity	42
2.7.1.60	N-acylmannosamine kinase	GO:0009384	N-acylmannosamine kinase activity	2
2.7.1.71	shikimate kinase	GO:0004765	shikimate kinase activity	95
2.7.2.11	glutamate 5-kinase	GO:0004349	glutamate 5-kinase activity	69
2.7.2.3	phosphoglycerate kinase	GO:0004618	phosphoglycerate kinase activity	70
2.7.2.4	aspartate kinase	GO:0004072	aspartate kinase activity	26
2.7.2.8	acetylglutamate kinase	GO:0003991	acetylglutamate kinase activity	29
2.7.4.14	UMP/CMP kinase	GO:0004127	cytidylate kinase activity	53
2.7.4.2	phosphomevalonate kinase	GO:0004631	phosphomevalonate kinase activity	7
2.7.4.3	adenylate kinase	GO:0004017	adenylate kinase activity	118
2.7.4.6	nucleoside-diphosphate kinase	GO:0004550	nucleoside diphosphate kinase activity	72
2.7.6.1	ribose-phosphate diphosphokinase	GO:0004749	ribose phosphate diphosphokinase activity	86
2.7.7.12	UDP-glucose-hexose-1-phosphate uridylyltransferase	GO:0008108	UDP-glucose:hexose-1-phosphate uridylyltransferase activity	23
2.7.7.13	mannose-1-phosphate guanylyltransferase	GO:0004475	mannose-1-phosphate guanylyltransferase activity	62
2.7.7.23	UDP-N-acetylglucosamine diphosphorylase	GO:0052630	UDP-N-acetylgalactosamine diphosphorylase activity	66
2.7.7.24	glucose-1-phosphate thymidylyltransferase	GO:0008879	glucose-1-phosphate thymidylyltransferase activity	2
2.7.7.27	glucose-1-phosphate adenylyltransferase	GO:0008878	glucose-1-phosphate adenylyltransferase activity	77
2.7.7.43	N-acylneuraminate cytidylyltransferase	GO:0008781	N-acylneuraminate cytidylyltransferase activity	5
2.7.7.60	2-C-methyl-D-erythritol 4-phosphate cytidylyltransferase	GO:0050518	2-C-methyl-D-erythritol 4-phosphate cytidylyltransferase activity	65
2.7.7.64	UTP-monosaccharide-1-phosphate uridylyltransferase	GO:0051748	UTP-monosaccharide-1-phosphate uridylyltransferase activity	20
2.7.7.9	UTP-glucose-1-phosphate uridylyltransferase	GO:0003983	UTP:glucose-1-phosphate uridylyltransferase activity	40
2.8.2.-				30
2.8.3.-				2
3.-.-.-				9
3.1.1.-				219
3.1.1.1	carboxylesterase	GO:0052689	carboxylic ester hydrolase activity	126
3.1.1.14	chlorophyllase	GO:0047746	chlorophyllase activity	12
3.1.1.17	gluconolactonase	GO:0004341	gluconolactonase activity	2
3.1.1.31	6-phosphogluconolactonase	GO:0017057	6-phosphogluconolactonase activity	36
3.1.1.45	carboxymethylenebutenolidase	GO:0008806	carboxymethylenebutenolidase activity	2
3.1.1.47	1-alkyl-2-acetylglycerophosphocholine esterase	GO:0003847	1-alkyl-2-acetylglycerophosphocholine esterase activity	7
3.1.1.78	polyneuridine-aldehyde esterase	GO:0050529	polyneuridine-aldehyde esterase activity	5
3.1.2.2	Phenylalanine ammonia-lyase	GO:0016290	palmitoyl-CoA hydrolase activity	12
3.1.3.-				272
3.1.3.11	fructose-bisphosphatase	GO:0042132	fructose 1,6-bisphosphate 1-phosphatase activity	93
3.1.3.13	bisphosphoglycerate phosphatase	GO:0034416	bisphosphoglycerate phosphatase activity	3
3.1.3.15	histidinol-phosphatase	GO:0004401	histidinol-phosphatase activity	15
3.1.3.18	phosphoglycolate phosphatase	GO:0008967	phosphoglycolate phosphatase activity	43
3.1.3.25	inositol-phosphate phosphatase	GO:0052834	inositol monophosphate phosphatase activity	86
3.1.3.29	N-acylneuraminate-9-phosphatase	GO:0050124	N-acylneuraminate-9-phosphatase activity	1
3.1.3.37	sedoheptulose-bisphosphatase	GO:0050278	sedoheptulose-bisphosphatase activity	10
3.1.3.5	5'-nucleotidase	GO:0017175	IMP-GMP specific 5'-nucleotidase activity	104
3.1.3.7	3'(2'),5'-bisphosphate nucleotidase	GO:0008441	3'(2'),5'-bisphosphate nucleotidase activity	17
3.2.1.-				80
3.2.1.105	3alpha(S)-strictosidine beta-glucosidase	GO:0050422	strictosidine beta-glucosidase activity	1
3.2.1.118	prunasin beta-glucosidase	GO:0050224	prunasin beta-glucosidase activity	2
3.2.1.14	chitinase	GO:0004568	chitinase activity	90
3.2.1.141	4-alpha-D-{(1->4)-alpha-D-glucano}trehalose trehalohydrolase	GO:0033942	4-alpha-D-{(1->4)-alpha-D-glucano}trehalose trehalohydrolase activity	6
3.2.1.165	exo-1,4-beta-D-glucosaminidase	GO:0052761	exo-1,4-beta-D-glucosaminidase activity	1
3.2.1.17	lysozyme	GO:0003796	lysozyme activity	18
3.2.1.21	beta-glucosidase	GO:0008422	beta-glucosidase activity	397
3.2.1.52	beta-N-acetylhexosaminidase	GO:0016231	beta-N-acetylglucosaminidase activity	58
3.2.1.55	non-reducing end alpha-L-arabinofuranosidase	GO:0046556	alpha-L-arabinofuranosidase activity	62
3.2.2.9	adenosylhomocysteine nucleosidase	GO:0008782	adenosylhomocysteine nucleosidase activity	23
3.3.2.1	isochorismatase	GO:0008908	isochorismatase activity	4
3.5.1.-				84
3.5.1.1	asparaginase	GO:0004067	asparaginase activity	19
3.5.1.11	penicillin amidase	GO:0008953	penicillin amidase activity	1
3.5.1.14	N-acyl-aliphatic-L-amino acid amidohydrolase	GO:0004046	aminoacylase activity	23
3.5.1.16	acetylornithine deacetylase	GO:0008777	acetylornithine deacetylase activity	11
3.5.1.25	N-acetylglucosamine-6-phosphate deacetylase	GO:0008448	N-acetylglucosamine-6-phosphate deacetylase activity	1
3.5.1.38	glutamin-(asparagin-)ase	GO:0050417	glutamin-(asparagin-)ase activity	2
3.5.1.41	chitin deacetylase	GO:0004099	chitin deacetylase activity	1
3.5.1.47	N-acetyldiaminopimelate deacetylase	GO:0050118	N-acetyldiaminopimelate deacetylase activity	9
3.5.2.6	beta-lactamase	GO:0008800	beta-lactamase activity	17
3.5.3.1	arginase	GO:0004053	arginase activity	8
3.5.3.22	proclavaminate amidinohydrolase	GO:0033972	proclavaminate amidinohydrolase activity	1
3.5.3.6	arginine deiminase	GO:0016990	arginine deiminase activity	12
3.5.4.10	IMP cyclohydrolase	GO:0003937	IMP cyclohydrolase activity	48
3.5.4.19	phosphoribosyl-AMP cyclohydrolase	GO:0004635	phosphoribosyl-AMP cyclohydrolase activity	32
3.5.4.6	AMP deaminase	GO:0003876	AMP deaminase activity	41
3.5.99.6	glucosamine-6-phosphate deaminase	GO:0004342	glucosamine-6-phosphate deaminase activity	21
3.6.1.-				217
3.6.1.31	phosphoribosyl-ATP diphosphatase	GO:0004636	phosphoribosyl-ATP diphosphatase activity	16
3.6.1.45	UDP-sugar diphosphatase	GO:0008768	UDP-sugar diphosphatase activity	2
4.1.1.1	Pyruvate decarboxylase	GO:0004737	pyruvate decarboxylase activity	34
4.1.1.11	aspartate 1-decarboxylase	GO:0004068	aspartate 1-decarboxylase activity	13
4.1.1.15	Glutamate decarboxylase	GO:0004351	glutamate decarboxylase activity	27
4.1.1.17	ornithine decarboxylase	GO:0004586	ornithine decarboxylase activity	21
4.1.1.18	Lysine decarboxylase	GO:0008923	lysine decarboxylase activity	7
4.1.1.20	Diaminopimelate decarboxylase	GO:0008836	diaminopimelate decarboxylase activity	18
4.1.1.21	phosphoribosylaminoimidazole carboxylase	GO:0004638	phosphoribosylaminoimidazole carboxylase activity	16
4.1.1.22	Histidine decarboxylase	GO:0004398	histidine decarboxylase activity	29
4.1.1.25	Tyrosine decarboxylase	GO:0004837	tyrosine decarboxylase activity	26
4.1.1.28	aromatic-L-amino-acid decarboxylase	GO:0004058	aromatic-L-amino-acid decarboxylase activity	11
4.1.1.32	phosphoenolpyruvate carboxykinase (GTP)	GO:0004613	phosphoenolpyruvate carboxykinase (GTP) activity	22
4.1.1.33	Diphosphomevalonate decarboxylase	GO:0004163	diphosphomevalonate decarboxylase activity	8
4.1.1.37	Uroporphyrinogen decarboxylase	GO:0004853	uroporphyrinogen decarboxylase activity	53
4.1.1.48	indole-3-glycerol-phosphate synthase	GO:0004425	indole-3-glycerol-phosphate synthase activity	59
4.1.1.49	phosphoenolpyruvate carboxykinase (ATP)	GO:0004612	phosphoenolpyruvate carboxykinase (ATP) activity	44
4.1.2.10	(R)-mandelonitrile lyase	GO:0046593	mandelonitrile lyase activity	13
4.1.2.13	fructose-bisphosphate aldolase	GO:0004332	fructose-bisphosphate aldolase activity	56
4.1.2.5	L-threonine aldolase	GO:0004793	threonine aldolase activity	30
4.1.2.8	indole-3-glycerol-phosphate lyase	GO:0033984	indole-3-glycerol-phosphate lyase activity	10
4.1.3.27	anthranilate synthase	GO:0005950	anthranilate synthase complex	59
4.1.3.36	1,4-dihydroxy-2-naphthoyl-CoA synthase	GO:0008935	1,4-dihydroxy-2-naphthoyl-CoA synthase activity	44
4.1.3.4	hydroxymethylglutaryl-CoA lyase	GO:0004419	hydroxymethylglutaryl-CoA lyase activity	19
4.1.3.40	chorismate lyase	GO:0008813	chorismate lyase activity	16
4.1.99.5	aldehyde oxygenase (deformylating)	GO:1990465	aldehyde oxygenase (deformylating) activity	2
4.2.1.-				41
4.2.1.10	3-dehydroquinate dehydratase	GO:0003855	3-dehydroquinate dehydratase activity	162
4.2.1.105	2-hydroxyisoflavanone dehydratase	GO:0033987	2-hydroxyisoflavanone dehydratase activity	10
4.2.1.11	phosphopyruvate hydratase	GO:0004634	phosphopyruvate hydratase activity	100
4.2.1.17	enoyl-CoA hydratase	GO:0004300	enoyl-CoA hydratase activity	94
4.2.1.19	imidazoleglycerol-phosphate dehydratase	GO:0004424	imidazoleglycerol-phosphate dehydratase activity	52
4.2.1.2	fumarate hydratase	GO:0004333	fumarate hydratase activity	29
4.2.1.20	tryptophan synthase	GO:0004834	tryptophan synthase activity	113
4.2.1.24	porphobilinogen synthase	GO:0004655	porphobilinogen synthase activity	14
4.2.1.3	aconitate hydratase	GO:0052633	isocitrate hydro-lyase (cis-aconitate-forming) activity	80
4.2.1.33	3-isopropylmalate dehydratase	GO:0003861	3-isopropylmalate dehydratase activity	135
4.2.1.46	dTDP-glucose 4,6-dehydratase	GO:0008460	dTDP-glucose 4,6-dehydratase activity	30
4.2.1.51	prephenate dehydratase	GO:0004664	prephenate dehydratase activity	35
4.2.1.75	uroporphyrinogen-III synthase	GO:0004852	uroporphyrinogen-III synthase activity	16
4.2.1.76	UDP-glucose 4,6-dehydratase	GO:0050377	UDP-glucose 4,6-dehydratase activity	12
4.2.1.78	(S)-norcoclaurine synthase	GO:0050474	(S)-norcoclaurine synthase activity	1
4.2.1.9	dihydroxy-acid dehydratase	GO:0004160	dihydroxy-acid dehydratase activity	66
4.2.1.91	arogenate dehydratase	GO:0047769	arogenate dehydratase activity	29
4.2.1.99	2-methylisocitrate dehydratase	GO:0047456	2-methylisocitrate dehydratase activity	1
4.2.3.-				1
4.2.3.13	(+)-delta-cadinene synthase	GO:0047461	(+)-delta-cadinene synthase activity	18
4.2.3.15	myrcene synthase	GO:0050551	myrcene synthase activity	2
4.2.3.16	(4S)-limonene synthase	GO:0050552	(4S)-limonene synthase activity	2
4.2.3.17	taxadiene synthase	GO:0050553	taxadiene synthase activity	2
4.2.3.18	abieta-7,13-diene synthase	GO:0050554	abietadiene synthase activity	1
4.2.3.19	ent-kaurene synthase	GO:0009899	ent-kaurene synthase activity	25
4.2.3.20	(R)-limonene synthase	GO:0034002	(R)-limonene synthase activity	2
4.2.3.21	vetispiradiene synthase	GO:0034003	vetispiradiene synthase activity	5
4.2.3.22	germacradienol synthase	GO:0052577	germacrene-D synthase activity	46
4.2.3.23	germacrene-A synthase	GO:0034005	germacrene-A synthase activity	10
4.2.3.24	amorpha-4,11-diene synthase	GO:0034006	amorpha-4,11-diene synthase activity	2
4.2.3.25	S-linalool synthase	GO:0034007	S-linalool synthase activity	2
4.2.3.26	R-linalool synthase	GO:0034008	R-linalool synthase activity	2
4.2.3.32	levopimaradiene synthase	GO:0052678	levopimaradiene synthase activity	4
4.2.3.4	3-dehydroquinate synthase	GO:0003856	3-dehydroquinate synthase activity	109
4.2.3.42	aphidicolan-16beta-ol synthase	GO:0046567	aphidicolan-16 beta-ol synthase activity	1
4.2.3.5	chorismate synthase	GO:0004107	chorismate synthase activity	52
4.2.3.9	aristolochene synthase	GO:0045483	aristolochene synthase activity	1
4.2.99.20	2-succinyl-6-hydroxy-2,4-cyclohexadiene-1-carboxylate synthase	GO:0070205	2-succinyl-6-hydroxy-2,4-cyclohexadiene-1-carboxylate synthase activity	18
4.3.1.12	ornithine cyclodeaminase	GO:0008473	ornithine cyclodeaminase activity	2
4.3.1.17	L-serine ammonia-lyase	GO:0003941	L-serine ammonia-lyase activity	21
4.3.1.19	threonine ammonia-lyase	GO:0004794	L-threonine ammonia-lyase activity	34
4.3.1.25	phenylalanine/tyrosine ammonia-lyase	GO:0052883	tyrosine ammonia-lyase activity	53
4.3.2.1	argininosuccinate lyase	GO:0004056	argininosuccinate lyase activity	63
4.3.2.2	adenylosuccinate lyase	GO:0070626	(S)-2-(5-amino-1-(5-phospho-D-ribosyl)imidazole-4-carboxamido)succinate AMP-lyase (fumarate-forming) activity	36
4.3.3.2	strictosidine synthase	GO:0016844	strictosidine synthase activity	46
4.3.3.7	4-hydroxy-tetrahydrodipicolinate synthase	GO:0008840	4-hydroxy-tetrahydrodipicolinate synthase	54
4.4.1.14	1-aminocyclopropane-1-carboxylate synthase	GO:0016847	1-aminocyclopropane-1-carboxylate synthase activity	22
4.4.1.8	cystathionine beta-lyase	GO:0004121	cystathionine beta-lyase activity	38
4.6.1.12	2-C-methyl-D-erythritol 2,4-cyclodiphosphate synthase	GO:0008685	2-C-methyl-D-erythritol 2,4-cyclodiphosphate synthase activity	49
4.99.1.1	ferrochelatase	GO:0004325	ferrochelatase activity	80
4.99.1.4	sirohydrochlorin ferrochelatase	GO:0051266	sirohydrochlorin ferrochelatase activity	30
5.1.1.17	isopenicillin-N epimerase	GO:0045439	isopenicillin-N epimerase activity	5
5.1.1.7	diaminopimelate epimerase	GO:0008837	AmiGO 2: Enitity Not Found (404)	44
5.1.2.3	3-hydroxybutyryl-CoA epimerase	GO:0008692	3-hydroxybutyryl-CoA epimerase activity	76
5.1.3.1	ribulose-phosphate 3-epimerase	GO:0004750	ribulose-phosphate 3-epimerase activity	29
5.1.3.14	UDP-N-acetylglucosamine 2-epimerase (non-hydrolysing)	GO:0008761	UDP-N-acetylglucosamine 2-epimerase activity	1
5.1.3.15	glucose-6-phosphate 1-epimerase	GO:0047938	glucose-6-phosphate 1-epimerase activity	54
5.1.3.18	GDP-mannose 3,5-epimerase	GO:0047918	GDP-mannose 3,5-epimerase activity	12
5.1.3.2	UDP-glucose 4-epimerase	GO:0003978	UDP-glucose 4-epimerase activity	98
5.1.3.3	Aldose 1-epimerase	GO:0004034	aldose 1-epimerase activity	15
5.1.3.5	UDP-arabinose 4-epimerase	GO:0050373	UDP-arabinose 4-epimerase activity	60
5.1.3.9	N-Acylglucosamine-6-phosphate 2-epimerase	GO:0047465	N-acylglucosamine-6-phosphate 2-epimerase activity	4
5.3.1.1	Triose-phosphate isomerase	GO:0004807	triose-phosphate isomerase activity	59
5.3.1.16	1-(5-phosphoribosyl)-5-[(5-phosphoribosylamino)methylideneamino]imidazole-4-carboxamide isomerase	GO:0003949	1-(5-phosphoribosyl)-5-[(5-phosphoribosylamino)methylideneamino]imidazole-4-carboxamide isomerase activity	35
5.3.1.24	phosphoribosylanthranilate isomerase	GO:0004640	phosphoribosylanthranilate isomerase activity	57
5.3.1.6	Ribose-5-phosphate isomerase	GO:0004751	ribose-5-phosphate isomerase activity	58
5.3.1.8	Mannose-6-phosphate isomerase	GO:0004476	mannose-6-phosphate isomerase activity	22
5.3.1.9	Glucose-6-phosphate isomerase	GO:0004347	glucose-6-phosphate isomerase activity	106
5.3.3.2	isopentenyl-diphosphate DELTA-isomerase	GO:0004452	isopentenyl-diphosphate delta-isomerase activity	49
5.3.3.5	cholestenol DELTA-isomerase	GO:0047750	cholestenol delta-isomerase activity	4
5.3.3.8	dodecenoyl-CoA isomerase	GO:0004165	dodecenoyl-CoA delta-isomerase activity	71
5.3.99.9	neoxanthin synthase	GO:0034020	neoxanthin synthase activity	1
5.4.2.2	phosphoglucomutase (alpha-D-glucose-1,6-bisphosphate-dependent)	GO:0004614	phosphoglucomutase activity	68
5.4.2.3	phosphoacetylglucosamine mutase	GO:0004610	phosphoacetylglucosamine mutase activity	13
5.4.2.4	Bisphosphoglycerate mutase	GO:0004082	bisphosphoglycerate mutase activity	3
5.4.2.7	phosphopentomutase	GO:0008973	phosphopentomutase activity	19
5.4.2.8	phosphomannomutase	GO:0004615	phosphomannomutase activity	26
5.4.2.9	phosphoenolpyruvate mutase	GO:0050188	phosphoenolpyruvate mutase activity	2
5.4.3.8	glutamate-1-semialdehyde 2,1-aminomutase	GO:0042286	glutamate-1-semialdehyde 2,1-aminomutase activity	61
5.4.4.2	Isochorismate synthase	GO:0008909	isochorismate synthase activity	17
5.4.99.17	squalene-hopene cyclase	GO:0051007	squalene-hopene cyclase activity	1
5.4.99.5	Chorismate mutase	GO:0004106	chorismate mutase activity	42
5.4.99.7	Lanosterol synthase	GO:0000250	lanosterol synthase activity	10
5.4.99.8	Cycloartenol synthase	GO:0016871	cycloartenol synthase activity	10
5.5.1.12	copalyl diphosphate synthase	GO:0050559	copalyl diphosphate synthase activity	7
5.5.1.13	ent-copalyl diphosphate synthase	GO:0009905	ent-copalyl diphosphate synthase activity	15
5.5.1.14	syn-copalyl-diphosphate synthase	GO:0051498	syn-copalyl diphosphate synthase activity	2
5.5.1.4	inositol-3-phosphate synthase	GO:0004512	inositol-3-phosphate synthase activity	13
5.5.1.6	chalcone isomerase	GO:0045430	chalcone isomerase activity	35
5.5.1.8	(+)-bornyl diphosphate synthase	GO:0047926	geranyl-diphosphate cyclase activity	1
5.5.1.9	Cycloeucalenol cycloisomerase	GO:0047793	cycloeucalenol cycloisomerase activity	5
6.1.1.15	proline-tRNA ligase	GO:0004827	proline-tRNA ligase activity	142
6.1.1.17	glutamate-tRNA ligase	GO:0009332	glutamate-tRNA ligase complex	141
6.2.1.-				14
6.2.1.1	acetate-CoA ligase	GO:0003987	acetate-CoA ligase activity	62
6.2.1.12	4-Coumarate-CoA ligase	GO:0016207	4-coumarate-CoA ligase activity	23
6.2.1.26	O-succinylbenzoate-CoA ligase	GO:0008756	o-succinylbenzoate-CoA ligase activity	9
6.2.1.4	succinate-CoA ligase (GDP-forming)	GO:0045244	succinate-CoA ligase complex (GDP-forming)	3
6.2.1.5	Succinate-CoA ligase (ADP-forming)	GO:0042709	succinate-CoA ligase complex	73
6.3.1.1	aspartate-ammonia ligase	GO:0004071	aspartate-ammonia ligase activity	12
6.3.2.1	Pantoate-beta-alanine ligase	GO:0004592	pantoate-beta-alanine ligase activity	45
6.3.2.26	N-(5-amino-5-carboxypentanoyl)-L-cysteinyl-D-valine synthase	GO:0050564	N-(5-amino-5-carboxypentanoyl)-L-cysteinyl-D-valine synthase activity	7
6.3.2.6	phosphoribosylaminoimidazolesuccinocarboxamide synthase	GO:0004639	phosphoribosylaminoimidazolesuccinocarboxamide synthase activity	48
6.3.3.1	phosphoribosylformylglycinamidine cyclo-ligase	GO:0016882	cyclo-ligase activity	35
6.3.4.13	phosphoribosylamine-glycine ligase	GO:0004637	phosphoribosylamine-glycine ligase activity	19
6.3.4.14	Biotin carboxylase	GO:0009343	biotin carboxylase complex	76
6.3.4.18	5-(carboxyamino)imidazole ribonucleotide synthase	GO:0034028	5-(carboxyamino)imidazole ribonucleotide synthase activity	4
6.3.4.5	Argininosuccinate synthase	GO:0004055	argininosuccinate synthase activity	59
6.3.5.3	phosphoribosylformylglycinamidine synthase	GO:0004642	phosphoribosylformylglycinamidine synthase activity	119
6.3.5.4	Asparagine synthase (glutamine-hydrolysing)	GO:0004066	asparagine synthase (glutamine-hydrolyzing) activity	55
6.4.1.2	acetyl-CoA carboxylase	GO:0003989	acetyl-CoA carboxylase activity	122
6.4.1.3	propionyl-CoA carboxylase	GO:0004658	propionyl-CoA carboxylase activity	3
6.6.1.1	magnesium chelatase	GO:0016851	magnesium chelatase activity	34

## Sheet: PSM-not-mapped
Data S1d. Found enzymes related to secondary metabolite biosynthesis not mapped.
EC Number	KEGG Entity	Enzyme Name	GO Identifier	GO Description	Transcript Count
1.1.1.108	Carnitine	EC 1.1.1.108 - carnitine 3-dehydrogenase	GO:0047728	carnitine 3-dehydrogenase activity	3
1.1.1.112	Indanol	EC 1.1.1.112 - indanol dehydrogenase	GO:0047718	indanol dehydrogenase activity	4
1.1.1.116	D-arabinose				2
1.1.1.117	D-arabinose				2
1.1.1.12	L-arabinitol				1
1.1.1.120	Galactose	EC 1.1.1.120 - galactose 1-dehydrogenase (NADP+)	GO:0047910	galactose 1-dehydrogenase (NADP+) activity	2
1.1.1.135	GDP-6-deoxy-D-talose				1
1.1.1.138	Mannitol	EC 1.1.1.138 - mannitol 2-dehydrogenase (NADP+)	GO:0050085	mannitol 2-dehydrogenase (NADP+) activity	1
1.1.1.158	Transferred	EC 1.1.1.158 - UDP-N-acetylmuramate dehydrogenase	GO:0008762	UDP-N-acetylmuramate dehydrogenase activity	298
1.1.1.159	7-alpha-hydroxysteroid				1
1.1.1.175	D-xylose				1
1.1.1.183	Geraniol	EC 1.1.1.183 - geraniol dehydrogenase (NADP+)	GO:0047924	geraniol dehydrogenase activity	1
1.1.1.187	GDP-4-dehydro-D-rhamnose				7
1.1.1.19	Glucuronate	EC 1.1.1.19 - glucuronate reductase	GO:0047939	L-glucuronate reductase activity	1
1.1.1.196	15-hydroxyprostaglandin-D				3
1.1.1.200	Aldose-6-phosphate				9
1.1.1.209	3(or	EC 1.1.1.209 - 3(or 17)alpha-hydroxysteroid dehydrogenase	GO:0047023	androsterone dehydrogenase activity	4
1.1.1.225	Chlordecone	EC 1.1.1.225 - chlordecone reductase	GO:0047743	chlordecone reductase activity	1
1.1.1.233	N-acylmannosamine				1
1.1.1.255	Mannitol	EC 1.1.1.255 - mannitol dehydrogenase	GO:0046029	mannitol dehydrogenase activity	9
1.1.1.263	1,5-anhydro-D-fructose				1
1.1.1.268	2-(R)-hydroxypropyl-CoM				1
1.1.1.276	Serine	EC 1.1.1.276 - serine 3-dehydrogenase	GO:0031132	serine 3-dehydrogenase activity	1
1.1.1.69	Gluconate	EC 1.1.1.69 - gluconate 5-dehydrogenase	GO:0008875	gluconate dehydrogenase activity	4
1.1.1.73	Octanol	EC 1.1.1.73 - octanol dehydrogenase	GO:0004552	octanol dehydrogenase activity	2
1.1.1.75	(R)-aminopropanol				2
1.1.1.96	Diiodophenylpyruvate	EC 1.1.1.96 - diiodophenylpyruvate reductase	GO:0047860	diiodophenylpyruvate reductase activity	1
1.1.2.6	Polyvinyl	EC 1.1.2.6 - polyvinyl alcohol dehydrogenase (cytochrome)	GO:0047059	polyvinyl alcohol dehydrogenase (cytochrome) activity	2
1.1.3.10	Pyranose	EC 1.1.3.10 - pyranose oxidase	GO:0050233	pyranose oxidase activity	3
1.1.3.20	Long-chain-alcohol				25
1.1.3.37	D-arabinono-1,4-lactone				23
1.1.3.38	Vanillyl-alcohol				3
1.1.3.4	Glucose	EC 1.1.3.4 - glucose oxidase	GO:0046562	glucose oxidase activity	1
1.1.4.1	Vitamin-K-epoxide				5
1.1.4.2	Vitamin-K-epoxide				1
1.1.98.2	Glucose-6-phosphate				2
1.1.99.11	Fructose	EC 1.1.99.11 - fructose 5-dehydrogenase	GO:0047904	fructose 5-dehydrogenase activity	1
1.1.99.14	Glycolate	EC 1.1.99.14 - glycolate dehydrogenase	GO:0019154	glycolate dehydrogenase activity	25
1.1.99.18	Cellobiose	EC 1.1.99.18 - cellobiose dehydrogenase (acceptor)	GO:0047735	cellobiose dehydrogenase (acceptor) activity	2
1.1.99.24	Hydroxyacid-oxoacid				2
1.1.99.28	Glucose-fructose				1
1.10.3.2	Laccase.	EC 1.10.3.2 - laccase	GO:0052716	hydroquinone:oxygen oxidoreductase activity	125
1.10.3.4	o-aminophenol				2
1.11.1.10	Chloride	EC 1.11.1.10 - chloride peroxidase	GO:0019806	bromide peroxidase activity	2
1.11.1.14	Lignin	EC 1.11.1.14 - lignin peroxidase	GO:0016690	diarylpropane peroxidase activity	1
1.11.1.3	Fatty-acid				3
1.11.1.5	Cytochrome-c				5
1.12.5.1	Hydrogen:quinone	EC 1.12.5.1 - hydrogen:quinone oxidoreductase	GO:0047067	hydrogen:quinone oxidoreductase activity	1
1.12.7.2	Ferredoxin	EC 1.12.7.2 - ferredoxin hydrogenase	GO:0009375	ferredoxin hydrogenase complex	10
1.12.98.3	Methanosarcina-phenazine				1
1.13.11.24	Quercetin	EC 1.13.11.24 - quercetin 2,3-dioxygenase	GO:0008127	quercetin 2,3-dioxygenase activity	4
1.13.11.29	Stizolobate	EC 1.13.11.29 - stizolobate synthase	GO:0050297	stizolobate synthase activity	5
1.13.11.43	Lignostilbene	EC 1.13.11.43 - lignostilbene alphabeta-dioxygenase	GO:0050054	lignostilbene alpha beta-dioxygenase activity	2
1.13.11.47	3-hydroxy-4-oxoquinoline				2
1.13.12.7	Photinus-luciferin				2
1.14.11.16	Peptide-aspartate				2
1.14.11.24	2'-deoxymugineic-acid				4
1.14.11.27	[Histone	EC 1.14.11.27 - [histone-H3]-lysine-36 demethylase	GO:0051864	histone demethylase activity (H3-K36 specific)	48
1.14.11.6	Thymine	EC 1.14.11.6 - thymine dioxygenase	GO:0050341	thymine dioxygenase activity	9
1.14.11.7	Procollagen-proline				9
1.14.13.146	Taxoid	EC 1.14.13.146 - taxoid 14beta-hydroxylase	GO:0036203	taxoid 14-beta-hydroxylase activity	2
1.14.13.147	Taxoid	EC 1.14.13.147 - taxoid 7beta-hydroxylase	GO:0036239	taxoid 7beta-hydroxylase activity	1
1.14.13.24	3-hydroxybenzoate				10
1.14.13.29	4-nitrophenol				1
1.14.13.54	Ketosteroid	EC 1.14.13.54 - ketosteroid monooxygenase	GO:0047086	ketosteroid monooxygenase activity	4
1.14.16.5	Alkylglycerol	EC 1.14.16.5 - alkylglycerol monooxygenase	GO:0050479	glyceryl-ether monooxygenase activity	3
1.14.17.3	peptidylglycine monooxygenase	GO:0004504	peptidylglycine monooxygenase activity		6
1.14.19.5	Delta(11)-fatty-acid				1
1.14.99.-					23
1.14.99.29	Deoxyhypusine	EC 1.14.99.29 - deoxyhypusine monooxygenase	GO:0019135	deoxyhypusine monooxygenase activity	18
1.14.99.30	Transferred	EC 1.14.99.30 - carotene 7,8-desaturase	GO:0016719	carotene 7,8-desaturase activity	19
1.15.1.2	Superoxide	EC 1.15.1.2 - superoxide reductase	GO:0050605	superoxide reductase activity	2
1.16.1.1	Mercury(II)	EC 1.16.1.1 - mercury(II) reductase	GO:0016152	mercury (II) reductase activity	1
1.16.1.5	Aquacobalamin	EC 1.16.1.5 - aquacobalamin reductase (NADPH)	GO:0050444		1
1.16.1.7	Ferric-chelate				48
1.16.1.8	[Methionine	EC 1.16.1.8 - [methionine synthase] reductase	GO:0030586	[methionine synthase] reductase activity	1
1.16.1.9	Ferric-chelate				10
1.17.5.-					8
1.17.99.5	Bile-acid				2
1.2.1.51	Pyruvate	EC 1.2.1.51 - pyruvate dehydrogenase (NADP+)	GO:0050243	pyruvate dehydrogenase (NADP+) activity	3
1.2.1.67	Vanillin	EC 1.2.1.67 - vanillin dehydrogenase	GO:0050608	vanillin dehydrogenase activity	1
1.2.3.5	Glyoxylate	EC 1.2.3.5 - glyoxylate oxidase	GO:0047969	glyoxylate oxidase activity	2
1.2.3.9	Aryl-aldehyde				9
1.2.7.8	Indolepyruvate	EC 1.2.7.8 - indolepyruvate ferredoxin oxidoreductase	GO:0043805	indolepyruvate ferredoxin oxidoreductase activity	3
1.2.99.6	Carboxylate	EC 1.2.99.6 - carboxylate reductase	GO:0047770	carboxylate reductase activity	1
1.2.99.7	Aldehyde	EC 1.2.99.7 - aldehyde dehydrogenase (FAD-independent)	GO:0033727	aldehyde dehydrogenase (FAD-independent) activity	1
1.20.4.1	Arsenate	EC 1.20.4.1 - arsenate reductase (glutaredoxin)	GO:0008794	arsenate reductase (glutaredoxin) activity	9
1.20.4.2	Methylarsonate	EC 1.20.4.2 - methylarsonate reductase	GO:0050610	methylarsonate reductase activity	7
1.20.9.1	Arsenate	EC 1.20.9.1 - arsenate reductase (azurin)	GO:0050611	arsenate reductase (azurin) activity	1
1.21.4.2	Glycine	EC 1.21.4.2 - glycine reductase	GO:0030699	glycine reductase activity	4
1.21.4.3	Sarcosine	EC 1.21.4.3 - sarcosine reductase	GO:0033794	sarcosine reductase activity	2
1.21.4.4	Betaine	EC 1.21.4.4 - betaine reductase	GO:0033795	betaine reductase activity	1
1.3.1.30	Transferred	EC 1.3.1.30 - progesterone 5alpha-reductase	GO:0050213	progesterone 5-alpha-reductase activity	12
1.3.1.39	Enoyl-[acyl-carrier-protein]				5
1.3.1.48	15-oxoprostaglandin				8
1.3.1.74	2-alkenal				3
1.3.1.75	Divinyl	EC 1.3.1.75 - divinyl chlorophyllide a 8-vinyl-reductase	GO:0033728	divinyl chlorophyllide a 8-vinyl-reductase activity	2
1.3.3.-					8
1.3.3.1	Transferred	EC 1.3.3.1 - dihydroorotate oxidase	GO:0004158	dihydroorotate oxidase activity	63
1.3.3.11	Pyrroloquinoline-quinone				3
1.3.7.-					5
1.3.7.1	6-hydroxynicotinate				1
1.3.99.1	Deleted	EC 1.3.99.1 - succinate dehydrogenase	GO:0000104	succinate dehydrogenase activity	23
1.3.99.10	Transferred	EC 1.3.99.10 - isovaleryl-CoA dehydrogenase	GO:0008470	isovaleryl-CoA dehydrogenase activity	5
1.3.99.13	Transferred	EC 1.3.99.13 - long-chain-acyl-CoA dehydrogenase	GO:0004466	long-chain-acyl-CoA dehydrogenase activity	10
1.3.99.3	Transferred	EC 1.3.99.3 - acyl-CoA dehydrogenase	GO:0043958	acryloyl-CoA reductase activity	150
1.3.99.6	3-oxo-5-beta-steroid				1
1.4.1.18	Lysine	EC 1.4.1.18 - lysine 6-dehydrogenase	GO:0050303	lysine 6-dehydrogenase activity	1
1.4.3.13	Protein-lysine				8
1.5.1.12	Transferred	EC 1.5.1.12 - 1-pyrroline-5-carboxylate dehydrogenase	GO:0003842	1-pyrroline-5-carboxylate dehydrogenase activity	10
1.5.1.23	Tauropine	EC 1.5.1.23 - Tauropine dehydrogenase	GO:0050325	tauropine dehydrogenase activity	1
1.5.1.33	Pteridine	EC 1.5.1.33 - pteridine reductase	GO:0047040	pteridine reductase activity	1
1.5.3.11	Transferred	EC 1.5.3.11 - polyamine oxidase	GO:0046592	polyamine oxidase activity	50
1.5.3.15	N(8)-acetylspermidine				2
1.5.3.6	(R)-6-hydroxynicotine				2
1.5.5.1	Electron-transferring-flavoprotein				22
1.5.99.11	Transferred	EC 1.5.99.11 - 5,10-methylenetetrahydromethanopterin reductase	GO:0018537	coenzyme F420-dependent N5,N10-methenyltetrahydromethanopterin reductase activity	4
1.5.99.8	Transferred	EC 1.5.99.8 - proline dehydrogenase	GO:0004657	proline dehydrogenase activity	19
1.6.2.6	Leghemoglobin	EC 1.6.2.6 - leghemoglobin reductase	GO:0015043	leghemoglobin reductase activity	1
1.6.3.1	NAD(P)H oxidase (H2O2-forming)	GO:0016174	NAD(P)H oxidase activity		51
1.6.5.5	NADPH:quinone	EC 1.6.5.5 - NADPH:quinone reductase	GO:0003960	NADPH:quinone reductase activity	29
1.6.6.9	Trimethylamine-N-oxide				4
1.6.99.1	NADPH	EC 1.6.99.1 - NADPH dehydrogenase	GO:0052690	trichloro-p-hydroquinone reductive dehalogenase activity	26
1.8.-.-					19
1.8.1.-					1
1.8.1.14	CoA-disulfide				1
1.8.1.5	2-oxopropyl-CoM				2
1.8.1.8	Protein-disulfide				90
1.8.3.2	thiol oxidase	GO:0016972	thiol oxidase activity		19
1.8.4.11	Peptide-methionine				37
1.8.4.12	Peptide-methionine				27
1.8.4.13	L-methionine				1
1.8.5.1	Glutathione	EC 1.8.5.1 - glutathione dehydrogenase (ascorbate)	GO:0045174	glutathione dehydrogenase (ascorbate) activity	19
1.8.98.2	Sulfiredoxin.	EC 1.8.98.2 - sulfiredoxin	GO:0032542	sulfiredoxin activity	8
1.8.99.-					7
1.9.99.1	Iron--cytochrome-c				3
1.97.1.1	Chlorate	EC 1.97.1.1 - chlorate reductase	GO:0047143	chlorate reductase activity	2
1.97.1.4	[Formate-C-acetyltransferase]-activating				1
2.1.1.112	Glucuronoxylan	EC 2.1.1.112 - glucuronoxylan 4-O-methyltransferase	GO:0030775	glucuronoxylan 4-O-methyltransferase activity	12
2.1.1.113	Site-specific				4
2.1.1.124	[Cytochrome	EC 2.1.1.124 - [cytochrome c]-arginine N-methyltransferase	GO:0016275	[cytochrome c]-arginine N-methyltransferase activity	2
2.1.1.126	[Myelin	EC 2.1.1.126 - [myelin basic protein]-arginine N-methyltransferase	GO:0016277	[myelin basic protein]-arginine N-methyltransferase activity	9
2.1.1.127	[Ribulose-bisphosphate				34
2.1.1.129	Inositol	EC 2.1.1.129 - inositol 4-methyltransferase	GO:0030787	inositol 4-methyltransferase activity	4
2.1.1.137	Arsenite	EC 2.1.1.137 - arsenite methyltransferase	GO:0030791	arsenite methyltransferase activity	1
2.1.1.144	Trans-aconitate				6
2.1.1.145	Trans-aconitate				1
2.1.1.149	Transferred	EC 2.1.1.149 - myricetin O-methyltransferase	GO:0070448	laricitrin 5'-O-methyltransferase activity	9
2.1.1.154	Isoliquiritigenin	EC 2.1.1.154 - isoliquiritigenin 2'-O-methyltransferase	GO:0033802	isoliquiritigenin 2'-O-methyltransferase activity	2
2.1.1.162	Glycine/sarcosine/dimethylglycine	EC 2.1.1.162 - glycine/sarcosine/dimethylglycine N-methyltransferase	GO:0052730	sarcosine N-methyltransferase activity	1
2.1.1.171	16S	EC 2.1.1.171 - 16S rRNA (guanine966-N2)-methyltransferase	GO:0052913	16S rRNA (guanine(966)-N(2))-methyltransferase activity	1
2.1.1.172	16S	EC 2.1.1.172 - 16S rRNA (guanine1207-N2)-methyltransferase	GO:0052914	16S rRNA (guanine(1207)-N(2))-methyltransferase activity	18
2.1.1.173	23S	EC 2.1.1.173 - 23S rRNA (guanine2445-N2)-methyltransferase	GO:0052915	23S rRNA (guanine(2445)-N(2))-methyltransferase activity	42
2.1.1.174	23S	EC 2.1.1.174 - 23S rRNA (guanine1835-N2)-methyltransferase	GO:0052916	23S rRNA (guanine(1835)-N(2))-methyltransferase activity	17
2.1.1.181	23S	EC 2.1.1.181 - 23S rRNA (adenine1618-N6)-methyltransferase	GO:0052907	23S rRNA (adenine(1618)-N(6))-methyltransferase activity	16
2.1.1.182	16S	EC 2.1.1.182 - 16S rRNA (adenine1518-N6/adenine1519-N6)-dimethyltransferase	GO:0052908	16S rRNA (adenine(1518)-N(6)/adenine(1519)-N(6))-dimethyltransferase activity	69
2.1.1.183	18S	EC 2.1.1.183 - 18S rRNA (adenine1779-N6/adenine1780-N6)-dimethyltransferase	GO:0052909	18S rRNA (adenine(1779)-N(6)/adenine(1780)-N(6))-dimethyltransferase activity	8
2.1.1.184	23S	EC 2.1.1.184 - 23S rRNA (adenine2085-N6)-dimethyltransferase	GO:0052910	23S rRNA (adenine(2085)-N(6))-dimethyltransferase activity	1
2.1.1.187	23S	EC 2.1.1.187 - 23S rRNA (guanine745-N1)-methyltransferase	GO:0052911	23S rRNA (guanine(745)-N(1))-methyltransferase activity	1
2.1.1.192	23S	EC 2.1.1.192 - 23S rRNA (adenine2503-C2)-methyltransferase	GO:0070040	rRNA (adenine-C2-)-methyltransferase activity	107
2.1.1.221	tRNA	EC 2.1.1.221 - tRNA (guanine9-N1)-methyltransferase	GO:0052905	tRNA (guanine(9)-N(1))-methyltransferase activity	5
2.1.1.228	tRNA	EC 2.1.1.228 - tRNA (guanine37-N1)-methyltransferase	GO:0052906	tRNA (guanine(37)-N(1))-methyltransferase activity	89
2.1.1.33	tRNA	EC 2.1.1.33 - tRNA (guanine46-N7)-methyltransferase	GO:0008176	tRNA (guanine-N7-)-methyltransferase activity	62
2.1.1.34	tRNA	EC 2.1.1.34 - tRNA (guanosine18-2'-O)-methyltransferase	GO:0052666	tRNA (cytosine-2'-O-)-methyltransferase activity	6
2.1.1.35	tRNA	EC 2.1.1.35 - tRNA (uracil54-C5)-methyltransferase	GO:0030697	S-adenosylmethionine-dependent tRNA (m5U54) methyltransferase activity	15
2.1.1.42	Flavone	EC 2.1.1.42 - flavone 3'-O-methyltransferase	GO:0030744	luteolin O-methyltransferase activity	7
2.1.1.51	Transferred	EC 2.1.1.51 - rRNA (guanine-N1-)-methyltransferase	GO:0008989	rRNA (guanine-N1-)-methyltransferase activity	3
2.1.1.52	Transferred	EC 2.1.1.52 - rRNA (guanine-N2-)-methyltransferase	GO:0008990	rRNA (guanine-N2-)-methyltransferase activity	21
2.1.1.55	tRNA	EC 2.1.1.55 - tRNA (adenine-N6-)-methyltransferase	GO:0016430	tRNA (adenine-N6-)-methyltransferase activity	7
2.1.1.57	Methyltransferase	EC 2.1.1.57 - methyltransferase cap1	GO:0004483	mRNA (nucleoside-2'-O-)-methyltransferase activity	47
2.1.1.61	tRNA	EC 2.1.1.61 - tRNA (5-methylaminomethyl-2-thiouridylate)-methyltransferase	GO:0004808	tRNA (5-methylaminomethyl-2-thiouridylate)-methyltransferase activity	38
2.1.1.62	mRNA	EC 2.1.1.62 - mRNA (2'-O-methyladenosine-N6-)-methyltransferase	GO:0016422	mRNA (2'-O-methyladenosine-N6-)-methyltransferase activity	12
2.1.1.63	Methylated-DNA--[protein]-cysteine				7
2.1.1.65	Licodione	EC 2.1.1.65 - licodione 2'-O-methyltransferase	GO:0030751	licodione 2'-O-methyltransferase activity	2
2.1.1.74	(FADH(2)-oxidizing).				29
2.1.1.77	Protein-L-isoaspartate(D-aspartate)				21
2.1.1.79	Cyclopropane-fatty-acyl-phospholipid				10
2.1.1.88	8-hydroxyquercetin				2
2.1.1.89	Tetrahydrocolumbamine	EC 2.1.1.89 - tetrahydrocolumbamine 2-O-methyltransferase	GO:0030762	tetrahydrocolumbamine 2-O-methyltransferase activity	1
2.1.1.9	Thiol	EC 2.1.1.9 - thiol S-methyltransferase	GO:0018708	thiol S-methyltransferase activity	5
2.1.1.94	Tabersonine	EC 2.1.1.94 - tabersonine 16-O-methyltransferase	GO:0030766	11-O-demethyl-17-O-deacetylvindoline O-methyltransferase activity	2
2.1.1.98	Diphthine	EC 2.1.1.98 - diphthine synthase	GO:0004164	diphthine synthase activity	18
2.1.2.-					16
2.1.3.6	Putrescine	EC 2.1.3.6 - putrescine carbamoyltransferase	GO:0050231	putrescine carbamoyltransferase activity	2
2.2.1.5	2-hydroxy-3-oxoadipate				3
2.3.1.103	Sinapoylglucose--sinapoylglucose				6
2.3.1.104	Transferred	EC 2.3.1.104 - 1-alkenylglycerophosphocholine O-acyltransferase	GO:0047159	1-alkenylglycerophosphocholine O-acyltransferase activity	1
2.3.1.108	Alpha-tubulin				4
2.3.1.119	Icosanoyl-CoA				43
2.3.1.128	Ribosomal-protein-alanine				6
2.3.1.140	Rosmarinate	EC 2.3.1.140 - rosmarinate synthase	GO:0050266	rosmarinate synthase activity	1
2.3.1.144	Anthranilate	EC 2.3.1.144 - anthranilate N-benzoyltransferase	GO:0047672	anthranilate N-benzoyltransferase activity	3
2.3.1.151	2,3',4,6-tetrahydroxybenzophenone				1
2.3.1.161	Lovastatin	EC 2.3.1.161 - lovastatin nonaketide synthase	GO:0050637	lovastatin nonaketide synthase activity	5
2.3.1.184	Acyl-homoserine-lactone				2
2.3.1.25	Plasmalogen	EC 2.3.1.25 - plasmalogen synthase	GO:0050200	plasmalogen synthase activity	27
2.3.1.38	[Acyl-carrier-protein]				10
2.3.1.63	1-alkylglycerophosphocholine				1
2.3.1.68	Glutamine	EC 2.3.1.68 - glutamine N-acyltransferase	GO:0047946	glutamine N-acyltransferase activity	1
2.3.1.71	Glycine	EC 2.3.1.71 - glycine N-benzoyltransferase	GO:0047962	glycine N-benzoyltransferase activity	1
2.3.1.79	Maltose	EC 2.3.1.79 - maltose O-acetyltransferase	GO:0008925	maltose O-acetyltransferase activity	1
2.3.1.81	Aminoglycoside	EC 2.3.1.81 - aminoglycoside N3'-acetyltransferase	GO:0046353	aminoglycoside 3-N-acetyltransferase activity	3
2.3.1.84	Alcohol	EC 2.3.1.84 - alcohol O-acetyltransferase	GO:0004026	alcohol O-acetyltransferase activity	1
2.3.1.88	Peptide	EC 2.3.1.88 - peptide alpha-N-acetyltransferase	GO:0004596	peptide alpha-N-acetyltransferase activity	15
2.3.1.97	glycylpeptide N-tetradecanoyltransferase	GO:0004379	glycylpeptide N-tetradecanoyltransferase activity		19
2.3.1.99	Quinate	EC 2.3.1.99 - quinate O-hydroxycinnamoyltransferase	GO:0047205	quinate O-hydroxycinnamoyltransferase activity	12
2.3.2.15	Glutathione	EC 2.3.2.15 - glutathione gamma-glutamylcysteinyltransferase	GO:0016756	glutathione gamma-glutamylcysteinyltransferase activity	27
2.3.2.5	Glutaminyl-peptide				15
2.3.2.6	Leucyltransferase.	EC 2.3.2.6 - leucyltransferase	GO:0008914	leucyltransferase activity	27
2.3.2.8	Arginyltransferase.	EC 2.3.2.8 - arginyltransferase	GO:0004057	arginyltransferase activity	30
2.4.1.118	Cytokinin	EC 2.4.1.118 - cytokinin 7-beta-glucosyltransferase	GO:0047807	cytokinin 7-beta-glucosyltransferase activity	8
2.4.1.119	Transferred	EC 2.4.1.119 - dolichyl-diphosphooligosaccharideprotein glycotransferase	GO:0004579	dolichyl-diphosphooligosaccharide-protein glycotransferase activity	31
2.4.1.121	Indole-3-acetate				5
2.4.1.126	Hydroxycinnamate	EC 2.4.1.126 - hydroxycinnamate 4-beta-glucosyltransferase	GO:0047218	hydroxycinnamate 4-beta-glucosyltransferase activity	6
2.4.1.128	Scopoletin	EC 2.4.1.128 - scopoletin glucosyltransferase	GO:0050275	scopoletin glucosyltransferase activity	14
2.4.1.130	Transferred	EC 2.4.1.130 - dolichyl-phosphate-mannose-glycolipid alpha-mannosyltransferase	GO:0004584	dolichyl-phosphate-mannose-glycolipid alpha-mannosyltransferase activity	2
2.4.1.148	acetylglucosaminyltransferase.	EC 2.4.1.148 - acetylgalactosaminyl-O-glycosyl-glycoprotein beta-1,6-N-acetylglucosaminyltransferase	GO:0047225	acetylgalactosaminyl-O-glycosyl-glycoprotein beta-1,6-N-acetylglucosaminyltransferase activity	2
2.4.1.159	Flavonol-3-O-glucoside				1
2.4.1.163	acetylglucosaminyltransferase.	EC 2.4.1.163 - beta-galactosyl-N-acetylglucosaminylgalactosylglucosyl-ceramide beta-1,3-acetylglucosaminyltransferase	GO:0008457	beta-galactosyl-N-acetylglucosaminylgalactosylglucosyl-ceramide beta-1,3-acetylglucosaminyltransferase activity	2
2.4.1.173	Sterol	EC 2.4.1.173 - sterol 3beta-glucosyltransferase	GO:0016906	sterol 3-beta-glucosyltransferase activity	77
2.4.1.177	Cinnamate	EC 2.4.1.177 - cinnamate beta-D-glucosyltransferase	GO:0050412	cinnamate beta-D-glucosyltransferase activity	10
2.4.1.180	Lipopolysaccharide	EC 2.4.1.180 - lipopolysaccharide N-acetylmannosaminouronosyltransferase	GO:0047241	lipopolysaccharide N-acetylmannosaminouronosyltransferase activity	3
2.4.1.183	Alpha-1,3-glucan				9
2.4.1.186	Glycogenin	EC 2.4.1.186 - glycogenin glucosyltransferase	GO:0008466	glycogenin glucosyltransferase activity	1
2.4.1.19	Cyclomaltodextrin	EC 2.4.1.19 - cyclomaltodextrin glucanotransferase	GO:0043895	cyclomaltodextrin glucanotransferase activity	7
2.4.1.211	1,3-beta-galactosyl-N-acetylhexosamine				1
2.4.1.212	Hyaluronan	EC 2.4.1.212 - hyaluronan synthase	GO:0050501	hyaluronan synthase activity	5
2.4.1.213	Glucosylglycerol-phosphate				1
2.4.1.218	Hydroquinone	EC 2.4.1.218 - hydroquinone glucosyltransferase	GO:0050505	hydroquinone glucosyltransferase activity	11
2.4.1.219	Vomilenine	EC 2.4.1.219 - vomilenine glucosyltransferase	GO:0050506	vomilenine glucosyltransferase activity	1
2.4.1.229	[Skp1-protein]-hydroxyproline				1
2.4.1.230	Kojibiose	EC 2.4.1.230 - kojibiose phosphorylase	GO:0033831	kojibiose phosphorylase activity	1
2.4.1.242	NDP-glucose--starch				55
2.4.1.32	Glucomannan	EC 2.4.1.32 - glucomannan 4-beta-mannosyltransferase	GO:0047259	glucomannan 4-beta-mannosyltransferase activity	15
2.4.1.48	Heteroglycan	EC 2.4.1.48 - heteroglycan alpha-mannosyltransferase	GO:0052819	heteroglycan 2-alpha-mannosyltransferase activity	2
2.4.1.57	Phosphatidylinositol	EC 2.4.1.57 - phosphatidylinositol alpha-mannosyltransferase	GO:0043750	phosphatidylinositol alpha-mannosyltransferase activity	4
2.4.1.60	Abequosyltransferase.	EC 2.4.1.60 - abequosyltransferase	GO:0047600	abequosyltransferase activity	1
2.4.1.94	Protein	EC 2.4.1.94 - protein N-acetylglucosaminyltransferase	GO:0016262	protein N-acetylglucosaminyltransferase activity	21
2.4.2.11	Transferred	EC 2.4.2.11 - nicotinate phosphoribosyltransferase	GO:0004516	nicotinate phosphoribosyltransferase activity	38
2.4.2.29	tRNA-guanine(34)				105
2.4.2.39	Xyloglucan	EC 2.4.2.39 - xyloglucan 6-xylosyltransferase	GO:0033843	xyloglucan 6-xylosyltransferase activity	14
2.4.99.2	Monosialoganglioside	EC 2.4.99.2 - monosialoganglioside sialyltransferase	GO:0047288	monosialoganglioside sialyltransferase activity	3
2.5.1.27	Adenylate	EC 2.5.1.27 - adenylate dimethylallyltransferase	GO:0052623	ADP dimethylallyltransferase activity	11
2.5.1.34	4-dimethylallyltryptophan				3
2.5.1.43	Nicotianamine	EC 2.5.1.43 - nicotianamine synthase	GO:0030410	nicotianamine synthase activity	5
2.5.1.46	Deoxyhypusine	EC 2.5.1.46 - deoxyhypusine synthase	GO:0050983	deoxyhypusine biosynthetic process from spermidine	58
2.5.1.51	Beta-pyrazolylalanine				4
2.5.1.52	L-mimosine				4
2.5.1.60	Protein	EC 2.5.1.60 - protein geranylgeranyltransferase type II	GO:0004663	Rab geranylgeranyltransferase activity	48
2.5.1.76	Cysteate	EC 2.5.1.76 - cysteate synthase	GO:0044686	cysteate synthase activity	4
2.5.1.79	Thermospermine	EC 2.5.1.79 - thermospermine synthase	GO:0010487	thermospermine synthase activity	16
2.6.1.3	Cysteine	EC 2.6.1.3 - cysteine transaminase	GO:0047801	L-cysteine:2-oxoglutarate aminotransferase activity	4
2.6.1.46	Diaminobutyrate--pyruvate				6
2.6.1.6	Leucine	EC 2.6.1.6 - leucine transaminase	GO:0050048	L-leucine:2-oxoglutarate aminotransferase activity	2
2.6.1.63	Kynurenine--glyoxylate				5
2.6.1.80	Nicotianamine	EC 2.6.1.80 - nicotianamine aminotransferase	GO:0033855	nicotianamine aminotransferase activity	32
2.7.1.103	Viomycin	EC 2.7.1.103 - viomycin kinase	GO:0050394	viomycin kinase activity	1
2.7.1.160	2'-phosphotransferase.				4
2.7.1.28	Triokinase.	EC 2.7.1.28 - triokinase	GO:0050354	triokinase activity	8
2.7.1.7	Mannokinase.	EC 2.7.1.7 - mannokinase	GO:0019158	mannokinase activity	5
2.7.1.86	NADH	EC 2.7.1.86 - NADH kinase	GO:0042736	NADH kinase activity	50
2.7.1.95	Kanamycin	EC 2.7.1.95 - kanamycin kinase	GO:0008910	kanamycin kinase activity	2
2.7.10.-					25
2.7.11.4	[3-methyl-2-oxobutanoate				1
2.7.11.5	[Isocitrate	EC 2.7.11.5 - [Isocitrate dehydrogenase (NADP+)] kinase	GO:0008772	[isocitrate dehydrogenase (NADP+)] kinase activity	20
2.7.11.7	[Myosin	EC 2.7.11.7 - myosin-heavy-chain kinase	GO:0016905	myosin heavy chain kinase activity	9
2.7.11.8	Fas-activated				1
2.7.3.-					362
2.7.4.21	Inositol-hexakisphosphate				63
2.7.4.24	Diphosphoinositol-pentakisphosphate				20
2.7.4.4	Nucleoside-phosphate				6
2.7.7.10	UTP--hexose-1-phosphate				14
2.7.7.11	UTP--xylose-1-phosphate				14
2.7.7.21	Transferred	EC 2.7.7.21 - tRNA cytidylyltransferase	GO:0016437	tRNA cytidylyltransferase activity	40
2.7.7.22	Mannose-1-phosphate				22
2.7.7.25	Transferred	EC 2.7.7.25 - tRNA adenylyltransferase	GO:0004810	tRNA adenylyltransferase activity	43
2.7.7.35	Ribose-5-phosphate				4
2.7.7.42	[Glutamate--ammonia-ligase]				34
2.7.7.44	Glucuronate-1-phosphate				14
2.7.7.47	Streptomycin	EC 2.7.7.47 - streptomycin 3''-adenylyltransferase	GO:0009012	aminoglycoside 3''-adenylyltransferase activity	1
2.7.7.48	;	EC 2.7.7.48 - RNA-directed RNA polymerase	GO:0003968	RNA-directed RNA polymerase activity	930
2.7.7.52	RNA	EC 2.7.7.52 - RNA uridylyltransferase	GO:0050265	RNA uridylyltransferase activity	23
2.7.7.56	tRNA	EC 2.7.7.56 - tRNA nucleotidyltransferase	GO:0009022	tRNA nucleotidyltransferase activity	20
2.7.7.76	Molybdenum	EC 2.7.7.76 - molybdenum cofactor cytidylyltransferase	GO:0061602	molybdenum cofactor cytidylyltransferase activity	1
2.7.7.77	Molybdenum	EC 2.7.7.77 - molybdenum cofactor guanylyltransferase	GO:0061603	molybdenum cofactor guanylyltransferase activity	24
2.7.7.80	Molybdopterin-synthase				30
2.7.8.12	CDP-glycerol				6
2.7.8.23	Carboxyvinyl-carboxyphosphonate				1
2.7.8.25	Transferred	EC 2.7.8.25 - triphosphoribosyl-dephospho-CoA synthase	GO:0046917	triphosphoribosyl-dephospho-CoA synthase activity	8
2.7.8.3	Ceramide	EC 2.7.8.3 - ceramide cholinephosphotransferase	GO:0047493	ceramide cholinephosphotransferase activity	4
2.7.8.33	N-acetylglucosaminephosphotransferase.				4
2.7.9.4	Alpha-glucan,				19
2.7.9.5	Phosphoglucan,	EC 2.7.9.5 - phosphoglucan, water dikinase	GO:0051752	phosphoglucan, water dikinase activity	30
2.8.1.11	Molybdopterin-synthase				30
2.8.2.15	Steroid	EC 2.8.2.15 - steroid sulfotransferase	GO:0050294	steroid sulfotransferase activity	1
2.8.2.20	Protein-tyrosine				12
2.8.2.22	Aryl-sulfate				1
2.8.2.24	Desulfoglucosinolate	EC 2.8.2.24 - desulfoglucosinolate sulfotransferase	GO:0047364	desulfoglucosinolate sulfotransferase activity	6
2.8.2.8	[Heparan	EC 2.8.2.8 - [heparan sulfate]-glucosamine N-sulfotransferase	GO:0015016	[heparan sulfate]-glucosamine N-sulfotransferase activity	4
2.8.3.13	Succinate--hydroxymethylglutarate				1
2.9.1.-					11
3.1.-.-.					4
3.1.1.26	Galactolipase.	EC 3.1.1.26 - galactolipase	GO:0047714	galactolipase activity	27
3.1.1.29	Aminoacyl-tRNA				77
3.1.1.35	Dihydrocoumarin	EC 3.1.1.35 - dihydrocoumarin hydrolase	GO:0047856	dihydrocoumarin hydrolase activity	4
3.1.1.52	Phosphatidylinositol	EC 3.1.1.52 - phosphatidylinositol deacylase	GO:0050185	phosphatidylinositol deacylase activity	1
3.1.1.53	Sialate	EC 3.1.1.53 - sialate O-acetylesterase	GO:0001681	sialate O-acetylesterase activity	10
3.1.1.73	Feruloyl	EC 3.1.1.73 - feruloyl esterase	GO:0030600	feruloyl esterase activity	14
3.1.1.74	Cutinase.	EC 3.1.1.74 - cutinase	GO:0050525	cutinase activity	7
3.1.1.77	Acyloxyacyl	EC 3.1.1.77 - acyloxyacyl hydrolase	GO:0050528	acyloxyacyl hydrolase activity	1
3.1.1.8	cholinesterase	GO:0004104	cholinesterase activity		10
3.1.1.80	Acetylajmaline	EC 3.1.1.80 - acetylajmaline esterase	GO:0033879	acetylajmaline esterase activity	7
3.1.13.1	Exoribonuclease	EC 3.1.13.1 - exoribonuclease II	GO:0008859	exoribonuclease II activity	44
3.1.13.2	Exoribonuclease	EC 3.1.13.2 - exoribonuclease H	GO:0004533	exoribonuclease H activity	46
3.1.13.5	Ribonuclease	EC 3.1.13.5 - ribonuclease D	GO:0033890	ribonuclease D activity	4
3.1.2.15	Ubiquitin	EC 3.1.2.15 - ubiquitin thiolesterase	GO:0004221	ubiquitin thiolesterase activity	64
3.1.2.20	Acyl-CoA				24
3.1.2.3	Succinyl-CoA				1
3.1.2.5	Hydroxymethylglutaryl-CoA				1
3.1.21.1	deoxyribonuclease I	GO:0004530	deoxyribonuclease I activity		1
3.1.21.3	Type	EC 3.1.21.3 - type I site-specific deoxyribonuclease	GO:0009035	Type I site-specific deoxyribonuclease activity	5
3.1.21.4	Type	EC 3.1.21.4 - type II site-specific deoxyribonuclease	GO:0009036	Type II site-specific deoxyribonuclease activity	182
3.1.21.5	Type	EC 3.1.21.5 - type III site-specific deoxyribonuclease	GO:0015668	Type III site-specific deoxyribonuclease activity	1
3.1.21.7	Deoxyribonuclease	EC 3.1.21.7 - deoxyribonuclease V	GO:0043737	deoxyribonuclease V activity	6
3.1.26.8	Ribonuclease	EC 3.1.26.8 - ribonuclease M5	GO:0043822	ribonuclease M5 activity	2
3.1.27.1	Ribonuclease	EC 3.1.27.1 - ribonuclease T2	GO:0033897	ribonuclease T2 activity	30
3.1.27.10	rRNA	EC 3.1.27.10 - rRNA endonuclease	GO:0033902	rRNA endonuclease activity	1
3.1.27.3	Ribonuclease	EC 3.1.27.3 - ribonuclease T1	GO:0046589	ribonuclease T1 activity	2
3.1.27.5	pancreatic ribonuclease	GO:0004522	pancreatic ribonuclease activity		10
3.1.27.6	Enterobacter	EC 3.1.27.6 - Enterobacter ribonuclease	GO:0008847	Enterobacter ribonuclease activity	1
3.1.27.9	Transferred	EC 3.1.27.9 - tRNA-intron endonuclease	GO:0000214	tRNA-intron endonuclease complex	15
3.1.3.20	Phosphoglycerate	EC 3.1.3.20 - phosphoglycerate phosphatase	GO:0050192	phosphoglycerate phosphatase activity	1
3.1.3.22	Mannitol-1-phosphatase.				1
3.1.3.23	Sugar-phosphatase.				4
3.1.3.24	Sucrose-phosphate				19
3.1.3.31	Nucleotidase.	EC 3.1.3.31 - nucleotidase	GO:0008252	nucleotidase activity	33
3.1.3.32	Polynucleotide	EC 3.1.3.32 - polynucleotide 3'-phosphatase	GO:0046403	polynucleotide 3'-phosphatase activity	9
3.1.3.33	Polynucleotide	EC 3.1.3.33 - polynucleotide 5'-phosphatase	GO:0004651	polynucleotide 5'-phosphatase activity	51
3.1.3.43	[Pyruvate	EC 3.1.3.43 - [pyruvate dehydrogenase (acetyl-transferring)]-phosphatase	GO:0019909	[pyruvate dehydrogenase (lipoamide)] phosphatase regulator activity	2
3.1.3.54	Fructose-2,6-bisphosphate				1
3.1.4.37	2',3'-cyclic-nucleotide				6
3.1.4.38	Glycerophosphocholine	EC 3.1.4.38 - glycerophosphocholine cholinephosphodiesterase	GO:0047390	glycerophosphocholine cholinephosphodiesterase activity	2
3.2.1.101	Mannan	EC 3.2.1.101 - mannan endo-1,6-alpha-mannosidase	GO:0008496	mannan endo-1,6-alpha-mannosidase activity	1
3.2.1.11	Dextranase.	EC 3.2.1.11 - dextranase	GO:0033904	dextranase activity	3
3.2.1.119	Vicianin	EC 3.2.1.119 - vicianin beta-glucosidase	GO:0050392	vicianin beta-glucosidase activity	7
3.2.1.126	Coniferin	EC 3.2.1.126 - coniferin beta-glucosidase	GO:0047782	coniferin beta-glucosidase activity	5
3.2.1.129	Endo-alpha-sialidase.				1
3.2.1.130	Glycoprotein	EC 3.2.1.130 - glycoprotein endo-alpha-1,2-mannosidase	GO:0004569	glycoprotein endo-alpha-1,2-mannosidase activity	2
3.2.1.131	Xylan	EC 3.2.1.131 - xylan alpha-1,2-glucuronosidase	GO:0033939	xylan alpha-1,2-glucuronosidase activity	1
3.2.1.133	Glucan	EC 3.2.1.133 - glucan 1,4-alpha-maltohydrolase	GO:0043897	glucan 1,4-alpha-maltohydrolase activity	3
3.2.1.135	Neopullulanase.	EC 3.2.1.135 - neopullulanase	GO:0031216	neopullulanase activity	1
3.2.1.136	Glucuronoarabinoxylan	EC 3.2.1.136 - glucuronoarabinoxylan endo-1,4-beta-xylanase	GO:0033940	glucuronoarabinoxylan endo-1,4-beta-xylanase activity	1
3.2.1.139	Alpha-glucuronidase.				3
3.2.1.142	Limit	EC 3.2.1.142 - limit dextrinase	GO:0010303	limit dextrinase activity	11
3.2.1.143	Poly(ADP-ribose)				29
3.2.1.150	Oligoxyloglucan	EC 3.2.1.150 - oligoxyloglucan reducing-end-specific cellobiohydrolase	GO:0033945	oligoxyloglucan reducing-end-specific cellobiohydrolase activity	1
3.2.1.151	Xyloglucan-specific				7
3.2.1.152	Mannosylglycoprotein	EC 3.2.1.152 - mannosylglycoprotein endo-beta-mannosidase	GO:0033947	mannosylglycoprotein endo-beta-mannosidase activity	10
3.2.1.153	Fructan	EC 3.2.1.153 - fructan beta-(2,1)-fructosidase	GO:0033948	fructan beta-(2,1)-fructosidase activity	1
3.2.1.154	Fructan	EC 3.2.1.154 - fructan beta-(2,6)-fructosidase	GO:0033949	fructan beta-(2,6)-fructosidase activity	13
3.2.1.157	Iota-carrageenase.				3
3.2.1.158	Alpha-agarase.				1
3.2.1.161	Beta-apiosyl-beta-glucosidase.				6
3.2.1.32	Endo-1,3-beta-xylanase.				6
3.2.1.36	Hyaluronoglucuronidase.	EC 3.2.1.36 - hyaluronoglucuronidase	GO:0033906	hyaluronoglucuronidase activity	4
3.2.1.38	Beta-D-fucosidase.				23
3.2.1.41	Pullulanase.	EC 3.2.1.41 - pullulanase	GO:0051060	pullulanase activity	13
3.2.1.59	Glucan	EC 3.2.1.59 - glucan endo-1,3-alpha-glucosidase	GO:0051118	glucan endo-1,3-alpha-glucosidase activity	1
3.2.1.6	Endo-1,3(4)-beta-glucanase.				14
3.2.1.60	Glucan	EC 3.2.1.60 - glucan 1,4-alpha-maltotetraohydrolase	GO:0033910	glucan 1,4-alpha-maltotetraohydrolase activity	1
3.2.1.63	1,2-alpha-L-fucosidase.				19
3.2.1.68	Isoamylase.	EC 3.2.1.68 - isoamylase	GO:0019156	isoamylase activity	25
3.2.1.73	Licheninase.	EC 3.2.1.73 - licheninase	GO:0042972	licheninase activity	4
3.2.1.75	Glucan	EC 3.2.1.75 - glucan endo-1,6-beta-glucosidase	GO:0052859	glucan endo-1,4-beta-glucosidase activity	1
3.2.1.81	Beta-agarase.				2
3.2.1.82	Exo-poly-alpha-galacturonosidase.				4
3.2.1.83	Kappa-carrageenase.				1
3.2.1.88	Non-reducing				23
3.2.1.89	Arabinogalactan	EC 3.2.1.89 - arabinogalactan endo-beta-1,4-galactanase	GO:0031218	arabinogalactan endo-1,4-beta-galactosidase activity	3
3.2.1.97	Endo-alpha-N-acetylgalactosaminidase.				85
3.2.1.98	Glucan	EC 3.2.1.98 - glucan 1,4-alpha-maltohexaosidase	GO:0033927	glucan 1,4-alpha-maltohexaosidase activity	1
3.2.1.99	Arabinan	EC 3.2.1.99 - arabinan endo-1,5-alpha-L-arabinanase	GO:0046558	arabinan endo-1,5-alpha-L-arabinosidase activity	4
3.2.2.10	Pyrimidine-5'-nucleotide				27
3.2.2.19	[Protein	EC 3.2.2.19 - [protein ADP-ribosylarginine] hydrolase	GO:0003875	ADP-ribosylarginine hydrolase activity	1
3.2.2.2	Inosine	EC 3.2.2.2 - inosine nucleosidase	GO:0047724	inosine nucleosidase activity	9
3.2.2.22	rRNA	EC 3.2.2.22 - rRNA N-glycosylase	GO:0030598	rRNA N-glycosylase activity	14
3.2.2.7	Adenosine	EC 3.2.2.7 - adenosine nucleosidase	GO:0047622	adenosine nucleosidase activity	5
3.3.2.7	Hepoxilin-epoxide				1
3.4.11.4	Tripeptide	EC 3.4.11.4 - tripeptide aminopeptidase	GO:0045148	tripeptide aminopeptidase activity	13
3.4.14.-					18
3.4.19.-					23
3.4.19.5	Beta-aspartyl-peptidase.				15
3.5.1.103	deacetylase.	EC 3.5.1.103 - N-acetyl-1-D-myo-inositol-2-amino-2-deoxy-alpha-D-glucopyranoside deacetylase	GO:0035595	N-acetylglucosaminylinositol deacetylase activity	5
3.5.1.28	N-acetylmuramoyl-L-alanine				13
3.5.1.60	N-(long-chain-acyl)ethanolamine				16
3.5.1.87	N-carbamoyl-L-amino-acid				1
3.5.1.88	peptide deformylase	GO:0042586	peptide deformylase activity		46
3.5.3.-					19
3.5.3.15	Protein-arginine				11
3.5.3.19	Transferred	EC 3.5.3.19 - ureidoglycolate hydrolase	GO:0004848	ureidoglycolate hydrolase activity	8
3.5.4.14	Transferred	EC 3.5.4.14 - deoxycytidine deaminase	GO:0047844	deoxycytidine deaminase activity	3
3.5.4.28	S-adenosylhomocysteine				25
3.5.5.8	Thiocyanate	EC 3.5.5.8 - thiocyanate hydrolase	GO:0018760	thiocyanate hydrolase activity	1
3.6.1.10	Endopolyphosphatase.	EC 3.6.1.10 - endopolyphosphatase	GO:0000298	endopolyphosphatase activity	2
3.6.1.25	Triphosphatase.	EC 3.6.1.25 - triphosphatase	GO:0050355	triphosphatase activity	20
3.6.1.30	Transferred	EC 3.6.1.30 - m7G(5')pppN diphosphatase	GO:0050072	m7G(5')pppN diphosphatase activity	3
3.6.1.42	Guanosine-diphosphatase.				15
3.6.1.52	Diphosphoinositol-polyphosphate				32
3.6.2.1	Adenylylsulfatase.	EC 3.6.2.1 - adenylylsulfatase	GO:0047627	adenylylsulfatase activity	17
3.6.3.1	Phospholipid-translocating				288
3.6.3.11	Chloride-transporting				1
3.6.3.16	Arsenite-transporting				20
3.6.3.19	Maltose-transporting				8
3.6.3.2	Magnesium-importing				10
3.6.3.23	Oligopeptide-transporting				42
3.6.3.3	Cadmium-exporting				33
3.6.3.35	Manganese-transporting				18
3.6.3.4	Cu(2+)-exporting				16
3.6.3.42	Beta-glucan-transporting				3
3.6.3.43	Peptide-transporting				5
3.6.3.46	Cadmium-transporting				10
3.6.3.47	Fatty-acyl-CoA-transporting				57
3.6.3.5	Zinc-exporting				31
3.6.3.7	Sodium-exporting				2
3.6.4.3	Microtubule-severing				64
3.6.4.4	Plus-end-directed				20
3.6.4.5	Minus-end-directed				35
3.7.1.6	Acetylpyruvate	EC 3.7.1.6 - acetylpyruvate hydrolase	GO:0018773	acetylpyruvate hydrolase activity	6
3.8.1.10	2-haloacid				1
4.1.1.43	Phenylpyruvate	EC 4.1.1.43 - Phenylpyruvate decarboxylase	GO:0050177	phenylpyruvate decarboxylase activity	1
4.1.1.71	2-oxoglutarate				3
4.1.1.72	Branched-chain-2-oxoacid				2
4.1.1.83	4-hydroxyphenylacetate				1
4.1.1.84	D-dopachrome				1
4.1.2.28	2-dehydro-3-deoxy-D-pentonate				1
4.1.3.32	2,3-dimethylmalate				5
4.1.3.6	Citrate	EC 4.1.3.6 - citrate (pro-3S)-lyase	GO:0009346	citrate lyase complex	2
4.1.99.13	(6-4)DNA				3
4.1.99.3	Deoxyribodipyrimidine	EC 4.1.99.3 - deoxyribodipyrimidine photo-lyase	GO:0003904	deoxyribodipyrimidine photo-lyase activity	19
4.2.1.39	Gluconate	EC 4.2.1.39 - Gluconate dehydratase	GO:0047929	gluconate dehydratase activity	2
4.2.1.50	Pyrazolylalanine	EC 4.2.1.50 - Pyrazolylalanine synthase	GO:0050234	pyrazolylalanine synthase activity	4
4.2.1.53	Oleate	EC 4.2.1.53 - Oleate hydratase	GO:0050151	oleate hydratase activity	1
4.2.1.60	Transferred	EC 4.2.1.60 - 3-hydroxydecanoyl-[acyl-carrier-protein] dehydratase	GO:0008693	3-hydroxydecanoyl-[acyl-carrier-protein] dehydratase activity	3
4.2.1.61	Transferred	EC 4.2.1.61 - 3-hydroxypalmitoyl-[acyl-carrier-protein] dehydratase	GO:0004317	3-hydroxypalmitoyl-[acyl-carrier-protein] dehydratase activity	6
4.2.1.74	Long-chain-enoyl-CoA				11
4.2.1.82	Xylonate	EC 4.2.1.82 - xylonate dehydratase	GO:0050401	xylonate dehydratase activity	1
4.2.1.93	ATP-dependent				11
4.2.1.96	4a-hydroxytetrahydrobiopterin				13
4.2.2.1	Hyaluronate	EC 4.2.2.1 - hyaluronate lyase	GO:0030340	hyaluronate lyase activity	2
4.2.2.10	Pectin	EC 4.2.2.10 - pectin lyase	GO:0047490	pectin lyase activity	6
4.2.2.12	Xanthan	EC 4.2.2.12 - xanthan lyase	GO:0047492	xanthan lyase activity	1
4.2.2.15	Anhydrosialidase.	EC 4.2.2.15 - anhydrosialidase	GO:0033995	anhydrosialidase activity	1
4.2.2.17	Inulin	EC 4.2.2.17 - inulin fructotransferase (DFA-I-forming)	GO:0033997	inulin fructotransferase (DFA-I-forming) activity	1
4.2.2.20	Chondroitin-sulfate-ABC				1
4.2.2.8	Heparin-sulfate				1
4.2.3.14	Transferred	EC 4.2.3.14 - pinene synthase	GO:0050550	pinene synthase activity	2
4.3.2.5	Peptidylamidoglycolate	EC 4.3.2.5 - peptidylamidoglycolate lyase	GO:0004598	peptidylamidoglycolate lyase activity	7
4.4.1.23	2-hydroxypropyl-CoM				1
4.4.1.4	Alliin	EC 4.4.1.4 - alliin lyase	GO:0047654	alliin lyase activity	1
4.5.1.1	DDT-dehydrochlorinase.				1
4.6.1.-					3
4.6.1.15	FAD-AMP				3
5.1.1.11	Phenylalanine	EC 5.1.1.11 - phenylalanine racemase (ATP-hydrolysing)	GO:0047462	phenylalanine racemase (ATP-hydrolyzing) activity	9
5.1.1.12	Ornithine	EC 5.1.1.12 - ornithine racemase	GO:0050157	ornithine racemase activity	2
5.1.3.11	Cellobiose	EC 5.1.3.11 - cellobiose epimerase	GO:0047736	cellobiose epimerase activity	1
5.3.1.13	Arabinose-5-phosphate				8
5.3.1.15	D-lyxose				1
5.3.2.-					18
5.4.-.-					25
5.4.1.2	Transferred	EC 5.4.1.2 - precorrin-8X methylmutase	GO:0016993	precorrin-8X methylmutase activity	1
5.4.2.1	Transferred	EC 5.4.2.1 - phosphoglycerate mutase	GO:0046538	2,3-bisphosphoglycerate-dependent phosphoglycerate mutase activity	65
5.4.99.12	tRNA	EC 5.4.99.12 - tRNA pseudouridine38-40 synthase	GO:0009982	pseudouridine synthase activity	364
5.4.99.30	UDP-arabinopyranose				4
5.5.1.16	Halimadienyl-diphosphate				1
5.99.1.-					22
5.99.1.3	DNA topoisomerase (ATP-hydrolysing)	GO:0003918	DNA topoisomerase type II (ATP-hydrolyzing) activity		143
6.1.1.-					53
6.2.1.24	Phytanate--CoA				2
6.2.1.8	Oxalate--CoA				10
6.3.1.13	ligase.	EC 6.3.1.13 - L-cysteine:1D-myo-inositol 2-amino-2-deoxy-alpha-D-glucopyranoside ligase	GO:0035446	cysteine-glucosaminylinositol ligase activity	11
6.3.1.14	Diphthine--ammonia				7
6.3.2.20	Indoleacetate--lysine				1
6.3.2.25	Tubulin--tyrosine				1
6.3.2.27	Transferred	EC 6.3.2.27 - aerobactin synthase	GO:0050565	aerobactin synthase activity	1
6.3.2.28	L-amino-acid				1
6.3.2.29	Cyanophycin	EC 6.3.2.29 - cyanophycin synthase (L-aspartate-adding)	GO:0071160	cyanophycin synthetase activity (L-aspartate-adding)	3
6.3.2.30	Cyanophycin	EC 6.3.2.30 - cyanophycin synthase (L-arginine-adding)	GO:0071161	cyanophycin synthetase activity (L-arginine-adding)	3
6.3.4.-					4
6.3.4.1	Transferred	EC 6.3.4.1 - GMP synthase	GO:0003921	AmiGO 2: Enitity Not Found (404)	1
6.4.1.6	Acetone	EC 6.4.1.6 - acetone carboxylase	GO:0018710	acetone carboxylase activity	1
6.4.1.7	2-oxoglutarate				1
6.5.1.-					12
6.5.1.3	RNA	EC 6.5.1.3 - RNA ligase (ATP)	GO:0003972	RNA ligase (ATP) activity	7
6.5.1.4	RNA	EC 6.5.1.4 - RNA 3'-terminal-phosphate cyclase (ATP)	GO:0003963	RNA-3'-phosphate cyclase activity	12

## Sheet: K Listing Tissues
Data S1e. K List of according to KO pathways and tissues.
KO ID	Combined K List	Leaf K List	Root K List
ko00902	K15086;K15095	K15086;K15095	K15086;K15095;K07385
ko00909	K00801;K00511;K15891;K14173;K15803;K14181;K14184	K00801;K00511;K15891;K14173;K15803;K14181;K14184	K00801;K00511;K15891;K14173;K15802;K15803;K14181;K14182;K14184
ko00941	K00660;K01859;K00475;K05278;K00487;K05280;K05277;K08695;K13081;K13065;K09754;K13082;K00588;K13083	K00660;K01859;K00475;K05278;K00487;K05280;K05277;K08695;K13081;K13065;K09754;K13082;K00588;K13083	K00660;K01859;K00475;K05278;K00487;K05280;K05277;K08695;K13080;K13081;K13065;K09754;K13082;K00588;K13083
ko01200	K00844;K01810;K00850;K01623;K01803;K00134;K00927;K01834;K15633;K15634;K01689;K00873;K00161;K00162;K00627;K00382;K00028;K00029;K00036;K01057;K00033;K01783;K01807;K00615;K00616;K00948;K00851;K00131;K01647;K01681;K00031;K00030;K00164;K00658;K01899;K01900;K00234;K00235;K01679;K00026;K00025;K01637;K00261;K19269;K11517;K03781;K15893;K15919;K15918;K00855;K01601;K01602;K05298;K03841;K01100;K01595;K14454;…	K00844;K01810;K00850;K01623;K01803;K00134;K00927;K01834;K15633;K15634;K01689;K00873;K00161;K00162;K00627;K00382;K00028;K00029;K00036;K01057;K00033;K01783;K01807;K00615;K00616;K00948;K00851;K00131;K01647;K01681;K00031;K00030;K00164;K00658;K01899;K01900;K00234;K01679;K00026;K00025;K01637;K00261;K19269;K11517;K03781;K15893;K15919;K15918;K00855;K01601;K01602;K05298;K03841;K01100;K01595;K14454;K14455;…	K00844;K01810;K00850;K01623;K01803;K00134;K00927;K01834;K15633;K01689;K00873;K00161;K00162;K00627;K00382;K00028;K00029;K00036;K01057;K00033;K01783;K01807;K00615;K00616;K00948;K00131;K01647;K01681;K00031;K00030;K00164;K00658;K01899;K01900;K00234;K00235;K01679;K00026;K00025;K01637;K01638;K00261;K19269;K11517;K03781;K15893;K15919;K00855;K01602;K05298;K03841;K01100;K01595;K14454;K14455;K00814;K14272;…
ko01210	K01647;K01681;K00031;K00030;K14454;K14455;K00811;K00928;K00133;K00814;K14272;K00620;K14682;K00930;K00145;K00818;K01438;K14677;K01703;K01704;K00052;K01652;K01653;K00053;K01687;K00826;K01649;K12156;K11820;K11821;K12153	K01647;K01681;K00031;K00030;K14454;K14455;K00811;K00928;K00133;K00814;K14272;K00620;K14682;K00930;K00145;K00818;K01438;K14677;K01703;K00052;K01652;K01653;K00053;K01687;K00826;K01649;K12156;K11820;K11821;K12153	K01647;K01681;K00031;K00030;K14454;K14455;K00811;K00928;K00133;K00814;K14272;K14682;K00930;K00145;K00818;K01438;K14677;K01703;K01704;K00052;K01652;K01653;K00053;K01687;K00826;K01649;K11820;K11818
ko01212	K11262;K01962;K02160;K01961;K01963;K00645;K00648;K09458;K00059;K02372;K00208;K10781;K03921;K07512;K01074;K00626;K07513;K10527;K00232;K00249;K01897;K10251;K10703;K10258;K00507;K10255;K10256;K10257	K11262;K01962;K02160;K01961;K01963;K00645;K00648;K09458;K00059;K02372;K00208;K10781;K03921;K07512;K01074;K00626;K07513;K10527;K00232;K00249;K01897;K10251;K10703;K10258;K00507;K10255;K10256;K10257	K11262;K01962;K02160;K01961;K00645;K00648;K09458;K00059;K00208;K10781;K03921;K07512;K01074;K00626;K07513;K10527;K00232;K00249;K01897;K10246;K10251;K10703;K10258;K00507;K10255;K10256;K10257
ko01230	K01803;K00134;K00927;K01834;K15633;K15634;K01689;K00873;K01623;K00850;K00615;K00616;K01783;K01807;K00948;K01703;K01704;K00052;K01652;K01653;K00053;K01687;K00826;K01649;K01754;K00600;K01620;K00058;K00831;K01079;K00640;K01738;K13034;K00928;K12524;K00133;K00872;K01733;K00814;K14272;K14454;K14455;K00811;K01915;K00264;K01739;K01760;K00549;K00789;K01647;K01681;K00031;K00030;K14085;K00620;K14682;K00930;…	K01803;K00134;K00927;K01834;K15633;K15634;K01689;K00873;K01623;K00850;K00615;K00616;K01783;K01807;K00948;K01703;K00052;K01652;K01653;K00053;K01687;K00826;K01649;K01754;K00600;K01620;K00058;K00831;K01079;K00640;K01738;K13034;K00928;K12524;K00133;K00872;K01733;K00814;K14272;K14454;K14455;K00811;K01915;K00264;K01739;K01760;K00549;K00789;K01647;K01681;K00031;K00030;K14085;K00620;K14682;K00930;K00145;…	K01803;K00134;K00927;K01834;K15633;K01689;K00873;K01623;K00850;K00615;K00616;K01783;K01807;K00948;K01703;K01704;K00052;K01652;K01653;K00053;K01687;K00826;K01649;K01754;K00600;K01620;K00058;K00831;K01079;K00640;K01738;K13034;K01758;K00928;K12524;K00133;K01733;K00814;K14272;K14454;K14455;K00811;K01915;K00264;K01739;K01760;K00549;K00789;K01958;K01647;K01681;K00031;K00030;K14085;K14682;K00930;K00145;…
ko01220	K00487;K00002;K00001;K00121	K00487;K00002;K00001;K00121	K00487;K00001;K00121
ko00010	K00844;K01810;K00850;K03841;K01623;K01803;K00134;K00927;K01834;K15633;K15634;K01689;K00873;K00161;K00162;K00627;K00382;K00016;K01568;K00121;K18857;K00001;K00002;K00128;K14085;K01895;K01785;K01835;K01792;K03103;K00131;K01610	K00844;K01810;K00850;K03841;K01623;K01803;K00134;K00927;K01834;K15633;K15634;K01689;K00873;K00161;K00162;K00627;K00382;K00016;K01568;K00121;K18857;K00001;K00002;K00128;K14085;K01895;K01785;K01835;K01792;K03103;K00131;K01610	K00844;K01810;K00850;K03841;K01623;K01803;K00134;K00927;K01834;K15633;K01689;K00873;K00161;K00162;K00627;K00382;K00016;K01568;K00121;K18857;K00001;K00128;K14085;K01895;K01785;K01835;K01792;K03103;K00131;K01610
ko00020	K01647;K01648;K01681;K00031;K00030;K00164;K00658;K00382;K01899;K01900;K00234;K00235;K01679;K00025;K00026;K01610;K00161;K00162;K00627	K01647;K01648;K01681;K00031;K00030;K00164;K00658;K00382;K01899;K01900;K00234;K01679;K00025;K00026;K01610;K00161;K00162;K00627	K01647;K01648;K01681;K00031;K00030;K00164;K00658;K00382;K01899;K01900;K00234;K00235;K01679;K00025;K00026;K01958;K01610;K00161;K00162;K00627
ko00030	K01810;K00036;K01057;K00033;K01783;K00615;K00616;K01807;K00852;K01835;K00948;K00131;K00851;K01623;K03841;K00850	K01810;K00036;K01057;K00033;K01783;K00615;K00616;K01807;K00852;K01835;K00948;K00131;K00851;K01623;K03841;K00850	K01810;K00036;K01057;K00033;K01783;K00615;K00616;K01807;K00852;K01835;K00948;K00131;K01623;K03841;K00850
ko00040	K01051;K01728;K01213;K00699;K16190;K12447;K00012;K00963;K00002;K01783;K00854;K01805;K00011;K00008;K00128	K01051;K01728;K01213;K00699;K16190;K12447;K00012;K00963;K00002;K01783;K00854;K01805;K00011;K00008;K00128	K01051;K01728;K01184;K01213;K00699;K16190;K12447;K00012;K00963;K01783;K00854;K01805;K00011;K00008;K00128
ko00051	K19355;K00847;K01809;K17497;K00966;K01711;K02377;K18447;K05305;K00844;K00850;K00895;K03841;K01103;K00008;K00011;K01805;K01623;K01803	K19355;K00847;K01809;K17497;K00966;K01711;K02377;K18447;K05305;K00844;K00850;K00895;K03841;K01103;K00008;K00011;K01805;K01623;K01803	K19355;K00847;K01809;K17497;K00966;K01711;K02377;K05305;K00844;K00850;K00895;K03841;K01103;K00008;K00011;K01805;K01623;K01803
ko00052	K01785;K00965;K01784;K00963;K01835;K00844;K01190;K12309;K12447;K18819;K06617;K07407;K00011;K00850;K01193;K06611;K01187	K01785;K00965;K01784;K00963;K01835;K00844;K01190;K12309;K12447;K18819;K06617;K07407;K00011;K00850;K01193;K06611;K01187	K01785;K00965;K01784;K00963;K01835;K00844;K01190;K12309;K12447;K18819;K06617;K07407;K00011;K00850;K01193;K01187
ko00053	K00012;K12447;K16190;K00699;K00469;K10046;K14190;K10047;K18649;K17744;K00225;K08232;K00423;K00434;K00128;K14085	K00012;K12447;K16190;K00699;K00469;K10046;K14190;K10047;K18649;K17744;K00225;K19642;K08232;K00423;K00434;K00128;K14085	K00012;K12447;K16190;K00699;K00469;K10046;K14190;K10047;K17744;K00225;K19642;K08232;K00423;K00434;K00128;K14085
ko00500	K01193;K00696;K00695;K01187;K01188;K05349;K05350;K01087;K16055;K01194;K00012;K00699;K08678;K00770;K08679;K13648;K01051;K01213;K00963;K01835;K00844;K01810;K00847;K00975;K18447;K00703;K00700;K00688;K01176;K01177;K00705;K01179;K01513	K01193;K00696;K00695;K01187;K01188;K05349;K05350;K01087;K16055;K01194;K00012;K00699;K08678;K00770;K08679;K13648;K01051;K01213;K00963;K01835;K00844;K01810;K00847;K00975;K18447;K00703;K00700;K00688;K01176;K01177;K00705;K01179;K01513	K01193;K00696;K00695;K01187;K01188;K05349;K05350;K01087;K16055;K01194;K00012;K00699;K08678;K00770;K15920;K08679;K13648;K01051;K01184;K01213;K00963;K01835;K00844;K01810;K00847;K00975;K00703;K00700;K00688;K01176;K01177;K00705;K01179;K01513
ko00520	K01183;K12373;K01836;K00972;K00326;K00844;K00621;K00847;K00820;K12446;K12447;K13379;K01209;K00770;K12448;K16190;K08678;K12449;K01810;K01835;K00963;K12450;K12451;K00012;K06118;K00965;K01784;K08679;K18677;K13648;K17497;K00966;K01711;K01809;K10046;K05305;K02377;K00975	K01183;K12373;K01836;K00972;K00326;K00844;K00621;K00847;K00820;K12446;K12447;K13379;K01209;K00770;K12448;K16190;K08678;K12449;K01810;K01835;K00963;K12450;K12451;K00012;K06118;K00965;K01784;K08679;K18677;K13648;K17497;K00966;K01711;K01809;K10046;K05305;K02377;K00975	K01183;K12373;K01836;K00972;K00326;K00844;K00621;K00847;K00820;K12446;K12447;K13379;K01209;K00770;K15920;K12448;K16190;K08678;K12449;K01810;K01835;K00963;K12450;K12451;K00012;K06118;K00965;K01784;K08679;K18677;K13648;K17497;K00966;K01711;K01809;K10046;K05305;K02377;K00975
ko00620	K01895;K00161;K00162;K00627;K00382;K00873;K11262;K01962;K02160;K01961;K01963;K01512;K00128;K14085;K00016;K00102;K01759;K01069;K18881;K00028;K00029;K00025;K00026;K00051;K01679;K01595;K01610;K01006;K00626;K01649	K01895;K00161;K00162;K00627;K00382;K00873;K11262;K01962;K02160;K01961;K01963;K01512;K00128;K14085;K00016;K00102;K01759;K01069;K18881;K00028;K00029;K00025;K00026;K00051;K01679;K01595;K01610;K01006;K00626;K01649	K01895;K00161;K00162;K00627;K00382;K00873;K11262;K01962;K02160;K01961;K00128;K14085;K00016;K00102;K01759;K01069;K18881;K00028;K00029;K01958;K00025;K00026;K00051;K01679;K01595;K01610;K01006;K01638;K00626;K01649
ko00630	K01637;K00025;K00026;K01647;K01681;K00626;K11517;K03781;K18121;K19269;K01601;K01602;K00830;K14272;K00284;K01915;K00600;K00281;K00605;K00382;K02437;K15918;K15893;K15919;K00122;K01433;K01455	K01637;K00025;K00026;K01647;K01681;K00626;K11517;K03781;K18121;K19269;K01601;K01602;K00830;K14272;K00284;K01915;K00600;K00281;K00605;K00382;K02437;K15918;K15893;K15919;K00122;K01433;K01455	K01637;K01638;K00025;K00026;K01647;K01681;K00626;K11517;K03781;K18121;K19269;K01602;K00830;K14272;K00284;K01915;K00600;K00281;K00605;K00382;K02437;K15893;K15919;K00122;K01455
ko00640	K01895;K00249;K05605;K11262;K01962;K02160;K01961;K01963;K01578;K01899;K01900;K00140;K00016;K00626	K01895;K00166;K00167;K09699;K00382;K00249;K05605;K11262;K01962;K02160;K01961;K01963;K01578;K01899;K01900;K00140;K00016;K00626	K01895;K00166;K00167;K09699;K00382;K00249;K05605;K11262;K01962;K02160;K01961;K01899;K01900;K00140;K00016;K00626
ko00650	K00626;K00074;K01580;K16871;K17761;K18121;K01641;K01640;K01652;K01653	K00626;K00074;K01580;K16871;K17761;K18121;K01641;K01640;K01652;K01653	K00626;K00074;K01580;K16871;K17761;K18121;K01641;K01640;K01652;K01653
ko00660	K01652;K01653;K01703;K01704;K00052	K01652;K01653;K01703;K00052	K01652;K01653;K01703;K01704;K00052
ko00562	K00914;K18081;K00888;K00889;K01099;K01110;K00921;K05857;K01114;K01092;K10047;K18649;K00999;K01858;K15422;K19517;K03103;K00913;K00915;K10572;K00469;K00140;K01803	K00914;K18081;K00888;K00889;K01099;K01110;K00921;K05857;K01114;K01092;K10047;K18649;K00999;K01858;K15422;K19517;K03103;K00913;K00915;K10572;K00469;K00140;K01803	K00914;K18081;K00888;K00889;K01110;K00921;K05857;K01114;K10047;K00999;K01858;K15422;K19517;K01106;K03103;K00913;K00915;K10572;K00469;K00140;K01803
ko00190	K05572;K05573;K05574;K05575;K05577;K05579;K05581;K05582;K03878;K03880;K03883;K03934;K03935;K03936;K03937;K03938;K03940;K03941;K03942;K03943;K03949;K03950;K03952;K03953;K03955;K11352;K11353;K03963;K03965;K03966;K00234;K00235;K00411;K00412;K00413;K00417;K02257;K02262;K02256;K02261;K02265;K02266;K02267;K02258;K02259;K02111;K02112;K02115;K02113;K02114;K02108;K02109;K02132;K02133;K02136;K02134;K02135;…	K05572;K05573;K05574;K05575;K05577;K05579;K05582;K03878;K03879;K03880;K03881;K03883;K03934;K03936;K03937;K03938;K03940;K03941;K03942;K03943;K03949;K03950;K03952;K03953;K03955;K11352;K11353;K03963;K03965;K03966;K00234;K00411;K00412;K00413;K00417;K02257;K02262;K02256;K02261;K02265;K02266;K02267;K02258;K02259;K02111;K02112;K02115;K02113;K02114;K02109;K02132;K02133;K02136;K02134;K02137;K02138;K02140;…	K03934;K03935;K03936;K03937;K03940;K03941;K03942;K03943;K03945;K03946;K03949;K03950;K03952;K03953;K03955;K11352;K11353;K03963;K03965;K03966;K00234;K00235;K00411;K00413;K00417;K00419;K02257;K02256;K02261;K02265;K02266;K02267;K02258;K02259;K02111;K02112;K02115;K02113;K02109;K02132;K02133;K02136;K02134;K02137;K02138;K02140;K02145;K02147;K02148;K02149;K02150;K02151;K02152;K02144;K02154;K02155;K03661;…
ko00195	K02703;K02704;K02705;K02716;K02717;K08901;K03541;K03542;K02721;K02723;K08902;K08903;K02689;K02690;K02692;K02693;K02694;K02695;K02698;K02699;K02701;K02634;K02636;K02638;K02639;K02641;K08906;K02114;K02112;K02115;K02111;K02113;K02109;K02108	K02703;K02704;K02705;K02706;K02709;K02716;K02717;K08901;K03541;K03542;K02723;K08903;K02689;K02690;K02692;K02693;K02695;K02698;K02699;K02701;K14332;K02634;K02636;K02638;K02639;K02641;K08906;K02114;K02112;K02115;K02111;K02113;K02109	K02703;K02704;K02705;K02716;K02717;K08901;K03541;K03542;K08902;K02689;K02690;K02692;K02693;K02694;K02695;K02698;K02636;K02638;K02639;K02641;K02112;K02115;K02111;K02113;K02109
ko00196	K08907;K08908;K08909;K08910;K08911;K08912;K08913;K08914;K08915;K08916;K08917;K14172	K08907;K08908;K08909;K08910;K08911;K08912;K08913;K08914;K08915;K08916;K08917;K14172	K08907;K08908;K08909;K08910;K08912;K08913;K08914;K08915;K08916;K08917
ko00710	K01601;K01602;K00927;K00134;K05298;K01623;K03841;K00615;K01100;K01807;K00855;K01803;K01783;K01595;K14454;K01610;K00814;K14272;K01006;K00029;K00051;K14455;K00025;K00026;K00028	K01601;K01602;K00927;K00134;K05298;K01623;K03841;K00615;K01100;K01807;K00855;K01803;K01783;K01595;K14454;K01610;K00814;K14272;K01006;K00029;K00051;K14455;K00025;K00026;K00028	K01602;K00927;K00134;K05298;K01623;K03841;K00615;K01100;K01807;K00855;K01803;K01783;K01595;K14454;K01610;K00814;K14272;K01006;K00029;K00051;K14455;K00025;K00026;K00028
ko00720	K01006;K01595;K01679;K00626;K00031;K01681;K01648;K01962;K02160;K01961;K01963;K01938;K00297;K01895	K01006;K01595;K01679;K00626;K00031;K01681;K01648;K01962;K02160;K01961;K01963;K01938;K00297;K01895	K01006;K01595;K01958;K01679;K00626;K00031;K01681;K01648;K01962;K02160;K01961;K01938;K00297;K01895
ko00680	K00121;K01070;K00122;K00600;K00830;K01689;K01595;K00863;K01623;K03841;K00850;K01895;K01834;K15633;K15634;K00058;K00831;K01079	K00121;K01070;K00122;K00600;K00830;K01689;K01595;K00863;K01623;K03841;K00850;K01895;K01834;K15633;K15634;K00058;K00831;K01079	K00121;K01070;K00122;K00600;K00830;K01689;K01595;K00863;K01623;K03841;K00850;K01895;K01834;K15633;K00058;K00831;K01079
ko00910	K01455;K02575;K10534;K00366;K00261;K00262;K01915;K00264;K00284;K01725;K01673;K01674	K01455;K02575;K10534;K00366;K00261;K00262;K01915;K00264;K00284;K01725;K01673;K01674	K01455;K02575;K10534;K00366;K00261;K00262;K01915;K00264;K00284;K01673;K01674
ko00920	K13811;K00860;K01082;K15422;K05907;K00387;K08738;K00392;K17725;K01011;K00640;K01738;K13034;K01739	K13811;K00860;K01082;K15422;K05907;K00387;K00392;K17725;K01011;K00640;K01738;K13034;K01739	K13811;K00860;K01082;K15422;K05907;K00387;K08738;K00392;K17725;K00640;K01738;K13034;K01739
ko00061	K11262;K01962;K02160;K01961;K01963;K00645;K00648;K09458;K00059;K02372;K00208;K10781;K10782;K03921;K01897	K11262;K01962;K02160;K01961;K01963;K00645;K00648;K09458;K00059;K02372;K00208;K10781;K10782;K03921;K01897	K11262;K01962;K02160;K01961;K00645;K00648;K09458;K00059;K00208;K10781;K10782;K03921;K01897
ko00062	K07512;K01074;K15397;K10251;K10703;K10258;K01068	K07512;K01074;K15397;K10251;K10703;K10258;K01068	K07512;K01074;K15397;K10246;K10251;K10703;K10258;K01068
ko00071	K00626;K07513;K10527;K00232;K00249;K01897;K00121;K18857;K00001;K00128;K14085	K00626;K07513;K10527;K00232;K00249;K01897;K00121;K18857;K00001;K00128;K14085	K00626;K07513;K10527;K00232;K00249;K01897;K13238;K00121;K18857;K00001;K00128;K14085
ko00072	K01641;K01640;K00626	K01641;K01640;K00626	K01641;K01640;K00626
ko00073	K15398;K15400;K15401;K17991;K13407;K15402;K15403;K15404;K13356	K15398;K15400;K15401;K17991;K13407;K15402;K15403;K15404;K13356	K15398;K15400;K15401;K17991;K13407;K13356
ko00100	K00801;K00511;K05917;K00222;K07748;K01824;K09828;K00227;K00213;K01052;K14674;K00559;K01853;K14423;K08246;K08242;K14424;K09832	K00801;K00511;K05917;K00222;K07748;K01824;K09828;K00227;K00213;K01052;K14674;K00559;K01853;K14423;K08246;K08242;K14424;K09832	K00801;K00511;K05917;K00222;K07748;K09828;K00227;K00213;K01052;K14674;K00559;K00223;K01853;K14423;K08242;K14424
ko00140	K12345;K10251;K00699;K00545	K12345;K10251;K07424;K00699;K00545	K10251;K00699
ko00561	K15918;K00128;K14085;K00011;K00002;K00863;K00864;K13506;K00630;K13508;K00655;K13513;K13519;K13523;K15728;K00901;K11155;K00679;K14674;K14457;K06118;K06119;K03715;K09480;K07407	K15918;K00128;K14085;K00011;K00002;K00863;K00864;K13506;K00630;K13508;K00655;K13513;K13519;K13523;K15728;K00901;K00679;K14674;K14457;K06118;K06119;K03715;K09480;K07407	K00128;K14085;K00011;K00863;K00864;K13506;K00630;K13508;K00655;K13513;K13519;K13523;K15728;K00901;K11155;K14674;K14457;K06118;K06119;K03715;K09480;K07407
ko00564	K00006;K00111;K13506;K00630;K13508;K13513;K13519;K13523;K00655;K01517;K15728;K00901;K01114;K01115;K16860;K01047;K14674;K13510;K16818;K06129;K06130;K18696;K01126;K14156;K00968;K00993;K00894;K00967;K05929;K00981;K08730;K01613;K00995;K01094;K08744;K13511;K00999	K00006;K00111;K13506;K00630;K13508;K13513;K13519;K13523;K00655;K01517;K15728;K00901;K01114;K01115;K16860;K01047;K14674;K13510;K06129;K06130;K18696;K01126;K14156;K00968;K00993;K00894;K00967;K05929;K00981;K08730;K01613;K00995;K01094;K08744;K13511;K00999	K00006;K00111;K13506;K00630;K13508;K13513;K13519;K13523;K00655;K15728;K00901;K01114;K01115;K16860;K01047;K14674;K13510;K16818;K06129;K06130;K18696;K01126;K14156;K00968;K00993;K00894;K00967;K05929;K00550;K00981;K08730;K01613;K00995;K08744;K13535;K00999
ko00565	K00993;K01047;K14674;K01114;K01115;K16860;K13510;K13519	K00993;K01047;K14674;K01114;K01115;K16860;K13510;K13519	K00993;K01047;K14674;K01114;K01115;K16860;K13510;K13519
ko00600	K00654;K04708;K04710;K12349;K04711;K04712;K04713;K04715;K04716;K04718;K01634;K17108;K01190;K12309;K07407	K00654;K04708;K04710;K12349;K04711;K04712;K04713;K04715;K04716;K04718;K01634;K17108;K01190;K12309;K07407	K00654;K04708;K04710;K12349;K04711;K04712;K04713;K04716;K04718;K01634;K17108;K01190;K12309;K07407
ko00590	K01047;K14674;K05309;K15730;K00079;K01254;K18592;K00432	K01047;K14674;K05309;K15730;K00079;K01254;K18592;K00432	K01047;K14674;K05309;K15730;K00079;K01254;K18592;K00432
ko00591	K01047;K14674;K15718;K00454	K01047;K14674;K15718;K00454;K07424	K01047;K14674;K15718;K00454
ko00592	K01047;K14674;K16818;K00454;K01723;K10525;K05894;K10526;K00232;K10527;K07513;K08241;K10528;K18857;K18858	K01047;K14674;K00454;K01723;K10525;K05894;K10526;K00232;K10527;K07513;K08241;K10528;K18857;K18858	K01047;K14674;K16818;K00454;K01723;K10525;K05894;K10526;K00232;K10527;K07513;K08241;K10528;K18857;K18858
ko01040	K00059;K10251;K10703;K10258;K00507;K03921;K10255;K10256;K10257;K00232;K07513;K01068	K00059;K10251;K10703;K10258;K00507;K03921;K10255;K10256;K10257;K00232;K07513;K01068	K10246;K00059;K10251;K10703;K10258;K00507;K03921;K10255;K10256;K10257;K00232;K07513;K01068
ko00230	K01517;K18453;K18447;K01835;K00948;K00764;K01945;K00601;K01952;K01933;K11808;K01923;K01756;K00602;K00759;K01081;K03787;K00760;K00088;K00940;K01510;K14641;K01519;K00106;K01951;K00942;K00873;K10807;K10808;K03040;K03043;K03046;K02999;K03002;K03000;K03005;K03006;K03010;K03011;K03012;K03013;K03014;K03015;K03016;K03007;K03008;K03018;K03021;K03023;K03026;K14721;K03027;K03019;K03020;K03022;K03024;K03025;…	K01517;K18453;K18447;K01835;K00948;K00764;K01945;K00601;K01952;K01933;K11808;K01923;K01756;K00602;K00759;K01081;K03787;K00760;K00088;K00940;K01510;K14641;K01519;K00106;K01951;K00942;K00873;K10807;K10808;K03040;K03043;K03046;K02999;K03002;K03000;K03005;K03006;K03010;K03011;K03012;K03013;K03014;K03015;K03016;K03008;K03018;K03021;K03023;K03026;K14721;K03027;K03019;K03020;K03022;K03024;K03025;K02335;…	K18453;K01835;K00948;K00764;K01945;K00601;K01952;K01933;K11808;K01923;K01756;K00602;K00759;K01081;K03787;K00088;K00940;K01510;K14641;K01519;K00106;K01951;K00942;K00873;K10807;K03043;K03046;K02999;K03002;K03005;K03006;K03010;K03011;K03012;K03013;K03014;K03015;K03016;K03008;K03018;K03023;K03026;K14721;K03027;K03020;K03024;K03025;K02320;K02684;K02685;K02327;K02328;K03504;K02325;K03506;K01939;K01490;…
ko00240	K11541;K01955;K01956;K01465;K00254;K13421;K13800;K09903;K00940;K00962;K01510;K14641;K01519;K01937;K03040;K03043;K03046;K02999;K03002;K03000;K03005;K03006;K03010;K03011;K03012;K03013;K03014;K03015;K03016;K03007;K03008;K03018;K03021;K03023;K03026;K14721;K03027;K03019;K03020;K03022;K03024;K03025;K02335;K02320;K02321;K02684;K02685;K02327;K02328;K03504;K03505;K02324;K02325;K02326;K03506;K00876;K01081;…	K11541;K01955;K01956;K00609;K01465;K00254;K13421;K13800;K09903;K00940;K00962;K01510;K14641;K01519;K01937;K03040;K03043;K03046;K02999;K03002;K03000;K03005;K03006;K03010;K03011;K03012;K03013;K03014;K03015;K03016;K03008;K03018;K03021;K03023;K03026;K14721;K03027;K03019;K03020;K03022;K03024;K03025;K02335;K02320;K02321;K02684;K02685;K02327;K02328;K03504;K03505;K02324;K02325;K02326;K03506;K00876;K01081;…	K11540;K01955;K01956;K00609;K01465;K00254;K13421;K13800;K09903;K00940;K00962;K01510;K14641;K01519;K01937;K03043;K03046;K02999;K03002;K03005;K03006;K03010;K03011;K03012;K03013;K03014;K03015;K03016;K03008;K03018;K03023;K03026;K14721;K03027;K03020;K03024;K03025;K02320;K02684;K02685;K02327;K02328;K03504;K02325;K03506;K00876;K01081;K03787;K01240;K00207;K01464;K01431;K00384;K10807;K16904;K01520;K13998;…
ko00250	K14454;K14455;K00811;K00278;K01953;K13566;K00814;K00830;K00827;K14272;K01940;K01755;K01939;K01756;K01580;K16871;K17761;K00264;K00261;K00262;K00294;K01915;K11541;K01955;K01956;K00820;K00764	K14454;K14455;K00811;K00278;K01953;K13566;K00814;K00830;K00827;K14272;K01940;K01755;K01939;K01756;K00609;K01580;K16871;K17761;K00264;K00261;K00262;K00294;K01915;K11541;K01955;K01956;K00820;K00764	K14454;K14455;K00811;K00278;K01953;K13566;K00814;K00830;K00827;K14272;K01940;K01755;K01939;K01756;K00609;K01580;K16871;K17761;K00264;K00261;K00262;K00294;K01915;K11540;K01955;K01956;K00820;K00764
ko00260	K00928;K12524;K00133;K00872;K01733;K01620;K00600;K01079;K00831;K00058;K15918;K01834;K15633;K15634;K15893;K15919;K00276;K00281;K00605;K00382;K02437;K00830;K00827;K14272;K00499;K00108;K00130;K14085;K00306;K01754;K12235;K01695;K01696;K06001	K00928;K12524;K00133;K00872;K01733;K01620;K00600;K01079;K00831;K00058;K15918;K01834;K15633;K15634;K15893;K15919;K00276;K00281;K00605;K00382;K02437;K00830;K00827;K14272;K00499;K00108;K00130;K14085;K00306;K01754;K12235;K01695;K01696;K06001	K00928;K12524;K00133;K01733;K01620;K00600;K01079;K00831;K00058;K01834;K15633;K15893;K15919;K00276;K00281;K00605;K00382;K02437;K00830;K00827;K14272;K00108;K00130;K14085;K00306;K01758;K01754;K12235;K01695;K01696;K06001
ko00270	K00640;K01738;K13034;K01760;K00547;K00549;K00789;K01611;K00797;K01244;K00899;K08963;K16054;K08967;K00815;K00558;K17398;K01251;K01762;K05933;K00928;K12524;K00133;K01739;K14454;K14455;K00811;K01011;K00016;K00025;K00026;K01761	K00640;K01738;K13034;K01760;K00547;K00549;K00789;K01611;K00797;K01244;K00899;K08963;K16054;K08967;K00815;K00558;K17398;K01251;K01762;K05933;K00928;K12524;K00133;K01739;K00826;K00827;K01919;K01920;K14454;K14455;K00811;K01011;K00016;K00025;K00026;K01761	K00640;K01738;K13034;K01758;K01760;K00547;K00549;K00789;K01611;K00797;K01244;K00899;K08963;K16054;K08967;K00815;K00558;K17398;K01251;K01762;K05933;K00928;K12524;K00133;K01739;K00826;K00827;K11204;K01919;K14454;K14455;K00811;K00016;K00025;K00026;K01761
ko00280	K00826;K00166;K00167;K09699;K00382;K00249;K00253;K07513;K05605;K00020;K00140;K00128;K14085;K18660;K01968;K01969;K05607;K01640;K00626;K01641	K00826;K00166;K00167;K09699;K00382;K00249;K00253;K07513;K05605;K00020;K00140;K00128;K14085;K18660;K01968;K01969;K05607;K01640;K00626;K01641	K00826;K00166;K00167;K09699;K00382;K00249;K00253;K07513;K05605;K00020;K00140;K00128;K14085;K18660;K01968;K01969;K05607;K01640;K00626;K01641
ko00290	K01754;K01703;K01704;K00052;K01652;K01653;K00053;K01687;K00826;K01649	K01754;K01703;K00052;K01652;K01653;K00053;K01687;K00826;K01649	K01754;K01703;K01704;K00052;K01652;K01653;K00053;K01687;K00826;K01649
ko00300	K00928;K12524;K00133;K01714;K00215;K01778;K10206;K01586;K14085	K00928;K12524;K00133;K01714;K00215;K01778;K10206;K01586;K14085	K00928;K12524;K00133;K01714;K01778;K10206;K01586;K14085
ko00310	K14157;K14085;K00164;K00658;K00626;K00306;K11420;K11422;K11423;K11433;K18826;K00128	K14157;K14085;K00164;K00658;K00626;K00306;K11420;K11422;K11423;K11433;K18826;K00128	K14157;K14085;K00164;K00658;K00626;K00306;K11420;K11422;K11423;K00128
ko00220	K00611;K01940;K01755;K01476;K01427;K13427;K01915;K00261;K00262;K14454;K14455;K00811;K00814;K14272;K14682;K00620;K00930;K00145;K00818;K14677;K01438	K00611;K01940;K01755;K01476;K01427;K13427;K01915;K00261;K00262;K14454;K14455;K00811;K00814;K14272;K14682;K00620;K00930;K00145;K00818;K14677;K01438	K00611;K01940;K01755;K01476;K01915;K00261;K00262;K14454;K14455;K00811;K00814;K14272;K14682;K00930;K00145;K00818;K14677;K01438
ko00330	K01583;K10536;K12251;K01581;K00797;K01611;K12259;K13366;K17839;K00128;K14085;K01426;K13427;K01476;K00819;K00286;K00318;K00294;K12657;K01259;K00472;K14454;K14455;K00811	K01583;K10536;K12251;K01581;K00797;K01611;K12259;K13366;K17839;K00128;K14085;K01426;K13427;K01476;K00819;K00286;K00318;K00294;K12657;K01259;K00472;K14454;K14455;K00811	K01583;K10536;K12251;K01581;K00797;K01611;K12259;K13366;K17839;K00128;K14085;K01476;K00819;K00286;K00318;K00294;K12657;K01259;K00472;K14454;K14455;K00811
ko00340	K00765;K11755;K01814;K01663;K01693;K00817;K18649;K00013;K01590;K00128;K14085	K00765;K11755;K01814;K01663;K01693;K00817;K18649;K00013;K01590;K00128;K14085	K00765;K01663;K01693;K00817;K00013;K01590;K00128;K14085
ko00350	K14454;K14455;K00811;K15849;K00815;K00817;K00457;K00451;K01800;K01555;K00422;K01592;K00545;K00276;K00121;K18857;K00001;K01557;K07253	K14454;K14455;K00811;K15849;K00815;K00817;K00457;K00451;K01800;K01555;K01592;K00545;K00276;K00121;K18857;K00001;K01557;K07253	K14454;K14455;K00811;K15849;K00815;K00817;K00457;K00451;K01800;K01555;K00422;K01592;K00276;K00121;K18857;K00001;K01557;K07253
ko00360	K00276;K00074;K14454;K14455;K00811;K15849;K00815;K00817;K00457;K07253;K01426;K10775;K00487;K01904;K00588	K00276;K00074;K14454;K14455;K00811;K15849;K00815;K00817;K00457;K07253;K01426;K10775;K00487;K01904;K00588	K00276;K00074;K14454;K14455;K00811;K15849;K00815;K00817;K00457;K07253;K10775;K00487;K01904;K00588
ko00380	K00164;K00626;K00128;K14085;K11816;K16903;K11868;K01426;K11820;K11821;K01237;K03781	K00164;K00626;K00128;K14085;K11816;K16903;K01426;K11820;K11821;K01237;K03781	K00164;K00626;K00128;K14085;K11816;K11868;K11818;K11820;K03781
ko00400	K01626;K01735;K13832;K00891;K00800;K01736;K01657;K01658;K00766;K01817;K01609;K01695;K01696;K06001;K01850;K15227;K05359;K14454;K14455;K00811;K15849;K00815;K00817	K01626;K01735;K13832;K00891;K00800;K01736;K01657;K01658;K00766;K01817;K01609;K01695;K01696;K06001;K01850;K15227;K05359;K14454;K14455;K00811;K15849;K00815;K00817	K01626;K01735;K13832;K00891;K00800;K01736;K01657;K01658;K01609;K01695;K01696;K06001;K01850;K15227;K05359;K14454;K14455;K00811;K15849;K00815;K00817
ko00410	K01580;K00797;K12259;K13366;K17839;K00276;K00128;K14085;K01918;K00207;K01464;K01431;K05605;K00249;K01578;K00140	K01580;K00797;K12259;K13366;K17839;K00276;K00128;K14085;K01918;K00207;K01464;K01431;K05605;K00249;K01578;K00140	K01580;K00797;K12259;K13366;K17839;K00276;K00128;K14085;K00207;K01464;K01431;K05605;K00249;K00140
ko00430	K01580;K10712;K18592	K01580;K10712;K18592	K01580;K10712;K18592
ko00440	K00967;K00993;K00968;K06167	K00967;K00993;K00968;K06167	K00967;K00993;K00968
ko00450	K01739;K01760;K00549;K01761;K11717;K08247;K00384;K13811;K01874	K01739;K01760;K00549;K01761;K11717;K08247;K00384;K13811;K01874	K01739;K01760;K00549;K01758;K01761;K11717;K08247;K00384;K13811;K01874
ko00460	K01188;K05349;K05350;K12153;K08248;K13034;K18592;K13035;K00600;K01455	K01188;K05349;K05350;K12153;K08248;K13034;K18592;K13035;K00600;K01455	K01188;K05349;K05350;K13034;K18592;K13035;K00600;K01455
ko00471	K00261	K00261	K00261
ko00480	K18592;K01469;K01919;K01920;K01255;K01256;K00799;K00383;K00031;K00033;K00036;K00432;K01581;K00797;K00434;K10807;K10808	K18592;K01469;K01919;K01920;K01255;K01256;K00799;K00383;K00031;K00033;K00036;K00432;K01581;K00797;K00434;K10807;K10808	K18592;K01469;K11204;K01919;K01255;K01256;K00799;K00383;K00031;K00033;K00036;K00432;K01581;K00797;K00434;K10807
ko00510	K00902;K01001;K00729;K07432;K07441;K00721;K03842;K03843;K03844;K03845;K03846;K03847;K03848;K03849;K03850;K07151;K12666;K12667;K12668;K12669;K12670;K07252;K01228;K05546;K01230;K00726;K01231;K00736;K00737	K00902;K01001;K00729;K07432;K07441;K00721;K09659;K03842;K03843;K03844;K03845;K03846;K03847;K03848;K03849;K03850;K07151;K12666;K12667;K12668;K12669;K12670;K07252;K01228;K05546;K01230;K00726;K01231;K00736;K00737	K00902;K01001;K00729;K07432;K07441;K03842;K03843;K03844;K03845;K03846;K03847;K03849;K03850;K07151;K12666;K12667;K12668;K12669;K12670;K07252;K01228;K05546;K01230;K00726;K01231;K00736;K00737
ko00513	K07432;K07441;K03842;K03843;K03844;K03845;K03846;K03847;K07151;K12666;K12667;K12668;K12669;K12670;K01230;K00726;K01231;K00736;K03714;K00753;K14413;K14412	K07432;K07441;K03842;K03843;K03844;K03845;K03846;K03847;K07151;K12666;K12667;K12668;K12669;K12670;K01230;K00726;K01231;K00736;K03714;K00753;K14413;K14412	K07432;K07441;K03842;K03843;K03844;K03845;K03846;K03847;K07151;K12666;K12667;K12668;K12669;K12670;K01230;K00726;K01231;K00736;K03714;K00753;K14413;K14412
ko00512	K00780	0	K00780
ko00514	K09667;K18134;K03691;K13667	K09667;K18134;K03691;K13667	K09667;K18134;K03691;K13667
ko00532	K00771	K00771	K00771
ko00534	K00771;K02370;K02366;K02367	K00771;K02370;K02366	K00771;K02370;K02367
ko00533	K00780	0	K00780
ko00531	K07964;K10532;K01205;K12309;K12373	K07964;K10532;K01205;K12309;K12373	K07964;K10532;K01205;K12309;K12373
ko00563	K03857;K03858;K03859;K03860;K03861;K03434;K05283;K05284;K07541;K07542;K05285;K05286;K05287;K05288;K05289;K05290;K05291;K05292;K05293;K05310	K03857;K03858;K03859;K03860;K03861;K03434;K05283;K05284;K07541;K07542;K05285;K05286;K05287;K05288;K05289;K05290;K05291;K05292;K05293;K05310	K03859;K03434;K05283;K05284;K05285;K05286;K05288;K05289;K05290;K05291;K05292;K05294;K05310
ko00603	K01988;K07407;K12373;K00780	K01988;K07407;K12373	K07407;K12373;K00780
ko00604	K00780;K12309;K12373	K12309;K12373	K00780;K12309;K12373
ko00540	K00677;K02535;K00748;K00912;K06041;K01627;K00979;K02527	K00677;K02535;K00748;K00912;K06041;K01627;K00979;K02527	K00677;K00748;K06041;K01627;K00979
ko00550	K01000;K02563	K01000;K02563	K02563
ko00511	K01190;K12309;K12373;K01191;K01227;K01206;K15923;K01444;K17108	K01190;K12309;K12373;K01191;K01227;K01206;K15923;K01444;K17108	K01190;K12309;K12373;K01191;K01227;K15923;K01444;K17108
ko00730	K03147;K14153;K04487;K01662;K03146;K00878;K06928;K00949	K03147;K14153;K04487;K01662;K03146;K00878;K06928;K00949	K03147;K14153;K04487;K01662;K03146;K00878;K00949
ko00740	K14652;K11752;K00794;K00793;K00861;K18453	K14652;K11752;K00794;K00793;K00861;K18453	K14652;K11752;K00794;K00793;K00861;K18453
ko00750	K00275;K00868;K13248;K05275;K00831;K01733;K06215;K08681	K00868;K13248;K05275;K00831;K01733;K06215;K08681	K00868;K13248;K00831;K01733;K06215;K08681
ko00760	K00278;K03517;K00767;K00763;K01081;K03787;K18551;K01240;K06210;K01513;K03426;K01950;K00858	K00278;K03517;K00767;K00763;K01081;K03787;K18551;K01240;K06210;K01513;K03426;K01950;K00858	K00278;K03517;K00767;K00763;K01081;K03787;K18551;K01240;K06210;K01513;K03426;K01950;K00858;K00323
ko00770	K01652;K01653;K00053;K01687;K00606;K01918;K09680;K01922;K01598;K01513;K02201;K00859;K06133;K00826;K00207;K01464;K01431	K01652;K01653;K00053;K01687;K00606;K01918;K09680;K01922;K01598;K01513;K02201;K00859;K06133;K00826;K00207;K01464;K01431	K01652;K01653;K00053;K01687;K00606;K09680;K01922;K01598;K01513;K02201;K00859;K00826;K00207;K01464;K01431
ko00780	K09458;K00059;K02372;K00208;K00652;K19562;K01012;K01942	K09458;K00059;K02372;K00208;K00652;K19562;K01012;K01942	K09458;K00059;K00208;K00652;K19562;K01012;K01942
ko00785	K03644;K03801	K03644;K03801	K03644;K03801
ko00790	K01495;K01113;K01633;K13941;K13998;K01930;K01307;K03639;K03635;K13950;K18482	K01495;K01113;K01633;K13941;K13998;K01930;K01307;K03639;K03635;K13950;K18482	K01113;K01633;K13998;K01930;K01307;K13950;K18482
ko00670	K13998;K01938;K00600;K00601;K00602;K00604;K00605;K01433;K00297;K01934	K13998;K01938;K00600;K00601;K00602;K00604;K00605;K01433;K00297;K01934	K13998;K01938;K00600;K00601;K00602;K00605;K00297
ko00830	K00121;K00001;K11147;K11155;K07437;K00699	K00121;K00001;K11147;K07437;K07424;K00699	K00121;K00001;K11147;K11155;K07437;K00699
ko00860	K01885;K02492;K01845;K01698;K01749;K01719;K01599;K00228;K02495;K00231;K01772;K02257;K02259;K03403;K03404;K03405;K03428;K04035;K19073;K00218;K04040;K08099;K13600;K13606;K18010;K13071;K13545;K10960;K00510;K00699;K08101;K19054	K01885;K02492;K01845;K01698;K01749;K01719;K01599;K00228;K02495;K00231;K01772;K02257;K02259;K03403;K03404;K03405;K03428;K04035;K19073;K00218;K04040;K08099;K13600;K13606;K18010;K13071;K13545;K10960;K00510;K00699;K08101;K19054	K01885;K02492;K01845;K01698;K01749;K01719;K01599;K00228;K00231;K01772;K02257;K02259;K03403;K03404;K04035;K00218;K04040;K13600;K13606;K18010;K13071;K13545;K10960;K00510;K00699;K08101;K19054
ko00130	K00815;K00487;K01904;K03183;K06125;K00591;K06126;K06127;K02552;K14759;K14760;K01661;K02548;K03809;K00457;K12501;K12502;K09833;K09834;K05928	K00815;K00487;K01904;K03183;K06125;K00591;K06126;K06127;K02552;K14759;K14760;K01661;K02548;K03809;K00457;K12501;K12502;K09833;K09834;K05928	K00815;K00487;K01904;K00591;K06126;K06127;K14759;K01661;K03809;K00457;K12501;K12502;K09833;K05928
ko00900	K01662;K00099;K00991;K00919;K01770;K03526;K03527;K00626;K01641;K00021;K00869;K00938;K01597;K01823;K00787;K14066;K13789;K05356;K11778;K10960;K05955;K05954;K08658;K06013;K00587;K15889;K05906;K15891;K15892	K01662;K00099;K00991;K00919;K01770;K03526;K03527;K00626;K01641;K00021;K00869;K00938;K01597;K01823;K00787;K14066;K13789;K05356;K11778;K10960;K05955;K05954;K08658;K06013;K00587;K15889;K05906;K15891;K15892	K01662;K00099;K01770;K03526;K03527;K00626;K01641;K00021;K00869;K00938;K01597;K01823;K00787;K14066;K13789;K05356;K11778;K10960;K05955;K06013;K15889;K05906;K15891;K15892
ko00904	K04120;K04121;K04122;K04123;K05282;K04124;K04125;K17961	K04120;K04121;K04122;K04123;K05282;K04124;K04125;K17961	K04121;K04122;K04123;K04125;K16083;K13070;K17961
ko00906	K02291;K02293;K15744;K00514;K09835;K06443;K06444;K15746;K15747;K09837;K09838;K09839;K09840;K09841;K09842;K09843;K17913	K02291;K02293;K15744;K00514;K09835;K06443;K06444;K15746;K15747;K09837;K09838;K09839;K09840;K09841;K09842;K09843	K02291;K02293;K00514;K09835;K06443;K15746;K09837;K09838;K09839;K09840;K09841;K09842;K09843;K17912;K17913
ko00905	K09587;K12639;K09588;K09591;K12637;K12638;K12640;K15639	K09587;K12639;K09588;K12637;K12638;K12640;K15639	K09588;K09591;K12637;K12640;K15639
ko00908	K10760;K10717;K00279;K00791	K10760;K10717;K00279;K00791	K10717;K00279;K13493;K00791
ko00903	K00128;K00517	K00128;K00517	K00128;K00517
ko00281	K01640	K01640	K01640
ko01051	K00615	K00615	K00615
ko00253	K01962;K02160;K01961;K01963	K01962;K02160;K01961;K01963	K01962;K02160;K01961
ko00523	K12451	K12451	K12451
ko01053	K02552	K02552	0
ko00940	K10775;K01188;K05349;K05350;K01904;K09753;K00487;K12355;K00083;K11188;K00430;K12356;K13065;K09754;K18368;K13066;K00588;K09755;K13068	K10775;K01188;K05349;K05350;K01904;K09753;K00487;K12355;K00083;K11188;K00430;K12356;K13065;K09754;K18368;K13066;K00588;K09755	K10775;K01188;K05349;K05350;K01904;K09753;K00487;K12355;K00083;K00430;K13065;K09754;K18368;K13066;K00588;K09755;K13068
ko00945	K00487;K00517;K16040;K13065;K09754;K00588	K00487;K00517;K13065;K09754;K00588	K00487;K00517;K13065;K09754;K00588
ko00944	K10757;K13269;K05280;K13083	K10757;K05280;K13083	K13080;K05280;K13083
ko00942	K12930;K17193;K12338;K12937	K12930;K17193;K12338;K12937	K12930;K12338;K12937
ko00943	K13260;K13261	K13260;K13263	K13258;K13260
ko00901	K08233	K08233	K08233
ko00950	K14454;K14455;K00811;K15849;K00815;K13384;K00422;K01592;K00276	K14454;K14455;K00811;K15849;K00815;K13384;K01592;K00276	K14454;K14455;K00811;K15849;K00815;K13384;K00422;K01592;K00276
ko00960	K00276;K08081;K14454;K14455;K00811;K15849;K00815;K00817	K00276;K08081;K14454;K14455;K00811;K15849;K00815;K00817	K00276;K08081;K14454;K14455;K00811;K15849;K00815;K00817
ko00232	K00106;K00365	K00106;K00365	K00106;K00365
ko00965	K00545;K15777	K00545;K15777	K15777
ko00966	K12156;K11820;K11821;K12153	K12156;K11820;K11821;K12153	K11820;K11818
ko00261	K13811;K00928;K12524;K00133;K01714;K00215	K13811;K00928;K12524;K00133;K01714;K00215	K13811;K00928;K12524;K00133;K01714
ko00521	K00844;K01835;K01858;K01092	K00844;K01835;K01858;K01092	K00844;K01835;K01858
ko00524	K00844	K00844	K00844
ko00401	K00815;K00817	K00815;K00817	K00815;K00817
ko00254	K11262	K11262	K11262
ko00362	K00074;K00626	K00074;K00626	K00074;K00626
ko00627	K01426;K01512;K00517;K01113	K01426;K01512;K00517;K01113	K00517;K01113
ko00364	K01061	K01061	K01061
ko00625	K00001;K00121;K00128	K00001;K00121;K00128	K00001;K00121;K00128
ko00361	K01061	K01061	K01061
ko00623	K01061	K01061	K01061
ko00643	K00451;K01800;K01555;K01426	K00451;K01800;K01555;K01426	K00451;K01800;K01555
ko00930	K00002	K00002	0
ko00363	K00517	K00517	K00517
ko00626	K00001;K00121	K00001;K00121	K00001;K00121
ko00624	K00517	K00517	K00517
ko00980	K00799;K00079;K00699;K00121;K00001	K00799;K00079;K00699;K00121;K00001	K00799;K00079;K00699;K00121;K00001
ko00982	K00485;K00799;K00121;K00001;K00699	K00485;K00799;K00121;K00001;K00699	K00799;K00121;K00001;K00699
ko00983	K00760;K00088;K01951;K00106;K01519;K00699;K01489;K00207;K01464;K01431;K00876;K00857;K13421	K00760;K00088;K01951;K00106;K01519;K00699;K01489;K00207;K01464;K01431;K00876;K00857;K13421	K00088;K01951;K00106;K01519;K00699;K01489;K00207;K01464;K01431;K00876;K00857;K13421
ko03020	K03040;K03043;K03046;K03010;K03006;K03011;K03008;K03012;K03015;K03013;K03014;K03016;K03007;K03021;K03018;K03020;K03027;K03023;K03026;K14721;K03019;K03022;K03024;K03025;K03002;K02999;K03000;K03005	K03040;K03043;K03046;K03010;K03006;K03011;K03008;K03012;K03015;K03013;K03014;K03016;K03021;K03018;K03020;K03027;K03023;K03026;K14721;K03019;K03022;K03024;K03025;K03002;K02999;K03000;K03005	K03043;K03046;K03010;K03006;K03011;K03008;K03012;K03015;K03013;K03014;K03016;K03018;K03020;K03027;K03023;K03026;K14721;K03024;K03025;K03002;K02999;K03005
ko03022	K03122;K03123;K03124;K03120;K03125;K03128;K14649;K03134;K03130;K03129;K03126;K03131;K03133;K03135;K03127;K03136;K03137;K03138;K03139;K03141;K03142;K03143;K03144;K10843;K10844;K02202;K10842;K06634	K03122;K03123;K03124;K03120;K03125;K03128;K03132;K14649;K03134;K03130;K03129;K03126;K03131;K03133;K03135;K03127;K03136;K03137;K03138;K03139;K03141;K03142;K03143;K03144;K10843;K10844;K02202;K10842;K06634	K03122;K03124;K03125;K03128;K03132;K14649;K03134;K03130;K03129;K03126;K03131;K03133;K03135;K03136;K03137;K03138;K03139;K03141;K03143;K10843;K02202;K10842
ko03040	K12811;K12812;K12813;K12815;K12816;K12817;K12818;K12819;K12820;K11086;K11087;K11088;K11093;K11091;K11095;K12821;K12822;K12823;K12824;K11092;K11094;K12825;K12826;K12827;K12828;K12829;K12830;K12831;K12833;K12834;K12835;K12836;K12837;K12839;K12840;K12842;K12622;K12623;K12624;K12626;K12843;K12662;K12844;K12845;K12846;K12847;K11984;K12848;K12849;K12850;K12852;K12854;K12855;K12856;K12857;K12858;K12859;…	K12811;K12812;K12813;K12815;K12816;K12817;K12818;K12819;K12820;K11086;K11087;K11096;K11088;K11093;K11091;K11095;K12821;K12822;K12823;K12824;K11092;K11094;K12825;K12826;K12827;K12828;K12829;K12830;K12831;K12834;K12835;K12836;K12837;K12839;K12840;K12842;K12621;K12622;K12623;K12626;K12843;K12662;K09567;K12844;K12845;K12846;K12847;K11984;K12848;K12849;K12850;K12852;K12854;K12855;K12856;K12857;K12858;…	K12811;K12812;K12815;K12817;K12818;K12819;K12820;K11086;K11096;K11088;K11097;K11098;K11093;K11091;K11095;K12821;K12822;K12823;K12824;K11092;K11094;K12825;K12826;K12827;K12828;K12829;K12830;K12832;K12833;K12835;K12836;K12837;K12839;K12840;K12842;K12621;K12623;K12843;K12662;K09567;K12844;K12845;K12846;K11984;K12848;K12849;K12850;K12852;K12854;K12855;K12856;K12857;K12858;K12859;K10599;K12860;K12861;…
ko03010	K02945;K02967;K02982;K02986;K02988;K02990;K02992;K02996;K02946;K02948;K02952;K02961;K02968;K02970;K02981;K02985;K02984;K02987;K02989;K02991;K02993;K02995;K02997;K02947;K02949;K02951;K02953;K02955;K02958;K02957;K02960;K02962;K02964;K02966;K02969;K02973;K02974;K02975;K02976;K02977;K02983;K02998;K02863;K02886;K02906;K02926;K02931;K02933;K02935;K02939;K02864;K02867;K02871;K02874;K02876;K02878;K02879;…	K02945;K02967;K02982;K02988;K02990;K02992;K02996;K02946;K02948;K02952;K02961;K02968;K02970;K02981;K02985;K02984;K02987;K02989;K02991;K02993;K02995;K02997;K02947;K02949;K02951;K02953;K02955;K02958;K02957;K02960;K02962;K02964;K02966;K02969;K02973;K02974;K02975;K02977;K02983;K02998;K02863;K02886;K02906;K02926;K02931;K02933;K02935;K02939;K02864;K02867;K02871;K02874;K02876;K02878;K02879;K02881;K02884;…	K02945;K02982;K02988;K02990;K02992;K02994;K02996;K02952;K02968;K02981;K02985;K02984;K02987;K02989;K02991;K02993;K02995;K02997;K02947;K02949;K02951;K02953;K02955;K02958;K02957;K02960;K02962;K02964;K02966;K02969;K02971;K02973;K02974;K02975;K02976;K02978;K02977;K02983;K02998;K02863;K02886;K02906;K02926;K02931;K02933;K02935;K02939;K02864;K02867;K02871;K02874;K02876;K02879;K02881;K02884;K02888;K02892;…
ko00970	K01885;K02433;K02434;K02435;K01886;K01872;K01876;K01893;K01880;K14164;K01868;K01875;K01883;K01874;K00604;K01873;K01869;K01870;K04567;K01887;K01881;K01892;K01889;K01890;K01866;K01867	K01885;K02433;K02434;K02435;K01886;K01872;K01876;K01893;K01880;K14164;K01868;K01875;K01883;K01874;K00604;K01873;K01869;K01870;K04567;K01887;K01881;K01892;K01889;K01890;K01866;K01867	K01885;K02433;K02434;K02435;K01886;K01872;K01876;K01893;K01880;K14164;K01868;K01875;K01883;K01874;K01873;K01869;K01870;K04567;K01887;K01881;K01892;K01889;K01890;K01866;K01867
ko03013	K01164;K03538;K03539;K18213;K00784;K07936;K14288;K14289;K03231;K14290;K14291;K12882;K12883;K05019;K02516;K14292;K14293;K13151;K07562;K14294;K09291;K14295;K14297;K14298;K14004;K14299;K14300;K14301;K14303;K14304;K14305;K14306;K14307;K14308;K14309;K14310;K14311;K14312;K14313;K14314;K14315;K14317;K14318;K14319;K10577;K12160;K14320;K14321;K13130;K13137;K03245;K03246;K03247;K03248;K03249;K03250;K03251;…	K01164;K03538;K03537;K03539;K18213;K00784;K07936;K14288;K14289;K03231;K14290;K14291;K12882;K12883;K05019;K02516;K14292;K14293;K13151;K07562;K14294;K09291;K14295;K14297;K14298;K14004;K14299;K14300;K14301;K14303;K14304;K14305;K14306;K14307;K14308;K14309;K14310;K14311;K14312;K14313;K14314;K14315;K14317;K14318;K14319;K10577;K12160;K14320;K14321;K13130;K13137;K03245;K03246;K03247;K03248;K03249;K03250;…	K01164;K03538;K03537;K14525;K03539;K00784;K07936;K14288;K14289;K03231;K14290;K12882;K12883;K05019;K14292;K14293;K13151;K07562;K09291;K14295;K14297;K14298;K14004;K14299;K14300;K14301;K14303;K14308;K14309;K14310;K14311;K14312;K14313;K14314;K14315;K14317;K14318;K14319;K10577;K12160;K13130;K13137;K03245;K03246;K03247;K03248;K03249;K03250;K03251;K03252;K03253;K03254;K03236;K03113;K03262;K03237;K03238;…
ko03015	K12882;K12883;K14328;K12876;K12877;K13025;K14324;K13114;K12875;K14325;K12881;K12812;K14294;K13171;K13917;K00565;K14396;K14397;K14398;K14376;K14399;K14400;K14401;K14402;K14403;K14404;K15542;K14962;K06269;K15544;K14406;K14407;K14408;K06100;K14411;K13126;K03265;K03267;K14326;K14327;K08873;K14409;K04382;K03456;K04354;K11583;K11584;K14416;K06965	K12882;K12883;K14328;K12876;K12877;K13025;K14324;K13114;K12875;K14325;K12881;K12812;K14294;K13171;K13917;K00565;K14396;K14397;K14398;K14376;K14399;K14400;K14401;K14402;K14403;K14404;K15542;K14962;K06269;K15544;K14406;K14407;K14408;K06100;K14411;K13126;K03265;K03267;K14326;K14327;K08873;K14409;K04382;K03456;K04354;K11583;K11584;K14416;K06965	K12882;K12883;K14328;K12876;K12877;K13025;K14324;K13114;K12875;K14325;K12881;K12812;K13917;K00565;K14396;K14397;K14398;K14376;K14399;K14400;K14401;K14403;K14404;K15542;K14962;K06269;K14406;K14407;K14408;K06100;K14411;K13126;K03265;K03267;K14326;K14327;K08873;K14409;K04382;K03456;K04354;K11583;K11584;K14416;K06965
ko03008	K03115;K03097;K14544;K14545;K14546;K14548;K14549;K14550;K14552;K14553;K14554;K14555;K14556;K14557;K14558;K14559;K14560;K14561;K14563;K14564;K14565;K12845;K11131;K11129;K11130;K14566;K14567;K14568;K14569;K14521;K11108;K01164;K03538;K03539;K14570;K13288;K12619;K06943;K14537;K14538;K14571;K14572;K14573;K11883;K07936;K14290;K07562;K03264;K14574;K14536;K14539;K18532;K07178;K07179	K03115;K03097;K14544;K14545;K14546;K14548;K14549;K14550;K14552;K14553;K14554;K14555;K14556;K14557;K14558;K14559;K14560;K14561;K14563;K14564;K14565;K12845;K11131;K11129;K11128;K14566;K14567;K14568;K14569;K14521;K11108;K01164;K03538;K03537;K03539;K14570;K13288;K12619;K06943;K14537;K14538;K14571;K14572;K14573;K11883;K07936;K14290;K07562;K03264;K14574;K14536;K14539;K18532;K07178;K07179	K03115;K03097;K14544;K14546;K14548;K14549;K14550;K14552;K14553;K14554;K14555;K14556;K14557;K14558;K14559;K14560;K14561;K14563;K14564;K14565;K12845;K11131;K11129;K11128;K14566;K14567;K14568;K14569;K14521;K11108;K01164;K03538;K03537;K14525;K03539;K14570;K13288;K12619;K06943;K14537;K14538;K14571;K14572;K14573;K11883;K07936;K14290;K07562;K03264;K14574;K14536;K14539;K18532;K07178;K07179
ko03060	K03217;K03070;K03106;K03110;K10956;K09481;K07342;K12275;K09540;K09490;K03109;K03104;K03108;K03107;K03105;K13431;K12272;K03116;K03118;K03100;K12946;K12947;K12948;K13280;K09647;K09648	K03217;K03070;K03106;K03110;K10956;K09481;K07342;K12275;K09540;K09490;K03109;K03104;K03108;K03107;K03105;K13431;K12272;K03116;K03118;K03100;K12946;K12947;K12948;K13280;K09647;K09648	K03217;K03070;K03106;K03110;K10956;K09481;K12275;K09540;K09490;K03104;K03108;K03107;K03105;K13431;K12272;K03116;K03100;K12946;K12947;K12948;K13280;K09647
ko04141	K10956;K09481;K07342;K12275;K09540;K12666;K12667;K12668;K12669;K12670;K07151;K01228;K14001;K09486;K09490;K09517;K09523;K09487;K05546;K08288;K08054;K08057;K01230;K14003;K07953;K14004;K14005;K14006;K14007;K11718;K10084;K10085;K09580;K09584;K13984;K10950;K10088;K13249;K13250;K14009;K13989;K14011;K14012;K13525;K14015;K14016;K03283;K09503;K09518;K04079;K09562;K13993;K13719;K14018;K10839;K04523;K01456;…	K10956;K09481;K07342;K12275;K09540;K12666;K12667;K12668;K12669;K12670;K07151;K01228;K14001;K09486;K09490;K09517;K09523;K09487;K05546;K08288;K08054;K08057;K01230;K14003;K07953;K14004;K14005;K14006;K14007;K11718;K10084;K10085;K09580;K09584;K13984;K10950;K10088;K13249;K13250;K14009;K13989;K14011;K14012;K13525;K14015;K14016;K03283;K09503;K09518;K04079;K09562;K13993;K13719;K14018;K10839;K04523;K01456;…	K10956;K09481;K12275;K09540;K12666;K12667;K12668;K12669;K12670;K07151;K01228;K14001;K09486;K09490;K09517;K09523;K09487;K05546;K08288;K08054;K08057;K01230;K14003;K07953;K14004;K14005;K14006;K14007;K11718;K10084;K10085;K09580;K09584;K13984;K10950;K10088;K13249;K13250;K14009;K13989;K14011;K14012;K13525;K14015;K14016;K03283;K09503;K09518;K04079;K09562;K13993;K13719;K14018;K10839;K04523;K01456;K11863;…
ko04130	K08486;K08488;K08489;K08490;K08492;K08493;K08495;K08496;K08497;K08498;K08503;K08504;K08505;K08506;K08507;K08515;K08516;K08517	K08486;K08488;K08489;K08490;K08492;K08493;K08495;K08496;K08497;K08498;K08503;K08504;K08505;K08506;K08507;K08515;K08516;K08517	K08486;K08488;K08490;K08492;K08493;K08495;K08496;K08497;K08498;K08503;K08504;K08505;K08506;K08515;K08516;K08517
ko04120	K03178;K10684;K10685;K10686;K10573;K06688;K06689;K10575;K10576;K10577;K10578;K04554;K10579;K10580;K10581;K10583;K10688;K04649;K10588;K10589;K10590;K10591;K10592;K10597;K09561;K10598;K10599;K04506;K10143;K10144;K04706;K10601;K10606;K03868;K03347;K03094;K03875;K10260;K03873;K03869;K10609;K10610;K10140;K10570;K10571;K03349;K03363;K03364;K03348;K03350;K03351;K03352;K03353;K03354;K03355;K03357	K03178;K10684;K10685;K10686;K10573;K06688;K06689;K10575;K10576;K10577;K10578;K04554;K10579;K10580;K10581;K10583;K10688;K04649;K10588;K10589;K10590;K10591;K10592;K10597;K09561;K10598;K10599;K04506;K10143;K10144;K04706;K10601;K10606;K03868;K03347;K03094;K03875;K03873;K03869;K10609;K10610;K10140;K10570;K10571;K03349;K03363;K03364;K03348;K03350;K03351;K03352;K03353;K03354;K03355;K03357	K03178;K10684;K10685;K10686;K10573;K06688;K06689;K10575;K10576;K10577;K10578;K04554;K10579;K10580;K10581;K10583;K10688;K04649;K10588;K10589;K10590;K10591;K10592;K10597;K10598;K10599;K04506;K10143;K10144;K04706;K10601;K03868;K03347;K03094;K03875;K03873;K03869;K10609;K10610;K10140;K10570;K10571;K03349;K03363;K03364;K03348;K03350;K03351;K03352;K03353;K03354;K03355;K03357;K12456
ko04122	K04487;K01011;K12161;K11996;K14168;K14169;K00566;K03635;K03639	K04487;K01011;K12161;K11996;K14168;K14169;K00566;K03635;K03639	K04487;K12161;K11996;K14168;K14169;K00566
ko03050	K03033;K03035;K03036;K03037;K03038;K03039;K03030;K03031;K03029;K03028;K03032;K03061;K03062;K03066;K03064;K03065;K03063;K06699;K02730;K02726;K02728;K02731;K02729;K02725;K02727;K02738;K02739;K02735;K02734;K02737;K02732;K02736;K06700;K11599	K03033;K03035;K03036;K03037;K03038;K03039;K03030;K03031;K03029;K03028;K03032;K03061;K03062;K03066;K03064;K03065;K03063;K06699;K02730;K02726;K02728;K02731;K02729;K02725;K02727;K02738;K02739;K02735;K02734;K02737;K02732;K02736;K06700;K11599	K03033;K03035;K03036;K03037;K03038;K03039;K03030;K03031;K03029;K03028;K03032;K03061;K03062;K03066;K03064;K03065;K03063;K06699;K02730;K02726;K02728;K02731;K02729;K02725;K02727;K02738;K02739;K02735;K02734;K02737;K02732;K02736;K06700;K11599
ko03018	K07573;K03679;K03681;K12586;K12587;K12589;K11600;K12590;K03678;K12585;K12591;K12592;K12593;K03514;K12598;K12599;K12600;K12602;K12603;K12604;K12605;K12580;K10643;K12581;K12606;K12607;K12608;K14442;K01148;K13126;K12611;K12613;K12614;K12616;K12617;K12619;K12620;K12622;K12623;K12624;K12626;K01689;K00962;K00850;K04043;K04077	K07573;K03679;K03681;K12586;K12587;K12589;K11600;K12590;K03678;K12585;K12591;K12592;K12593;K03514;K12598;K12599;K12600;K12602;K12603;K12604;K12605;K12580;K10643;K12581;K12606;K12607;K12608;K14442;K01148;K13126;K12611;K12613;K12614;K12616;K12617;K12619;K12620;K12621;K12622;K12623;K12626;K01689;K00962;K00850;K04043;K04077	K07573;K03679;K03681;K12586;K12587;K12589;K11600;K03678;K12585;K12591;K12592;K12593;K03514;K12598;K12599;K12600;K12602;K12603;K12604;K12605;K12580;K10643;K12581;K12606;K12607;K12608;K14442;K01148;K13126;K12611;K12613;K12614;K12616;K12617;K12619;K12620;K12621;K12623;K01689;K00962;K00850;K04043;K04077
ko03030	K03111;K03469;K02335;K07466;K04802;K10742;K04799;K10747;K02320;K02321;K02684;K02685;K02327;K02328;K03504;K03505;K02324;K02325;K02326;K03506;K02540;K02541;K02212;K02209;K02542;K02210;K10739;K10740;K10754;K10755;K10756;K10743;K10744;K10745	K03111;K03469;K02335;K07466;K04802;K10742;K04799;K10747;K02320;K02321;K02684;K02685;K02327;K02328;K03504;K03505;K02324;K02325;K02326;K03506;K02540;K02541;K02212;K02209;K02542;K02210;K10739;K10740;K10754;K10755;K10756;K10743;K10744;K10745	K07466;K04802;K10742;K04799;K10747;K02320;K02684;K02685;K02327;K02328;K03504;K02325;K03506;K02540;K02541;K02209;K02542;K02210;K10740;K10754;K10755;K10756
ko03410	K10563;K03660;K10773;K01247;K01246;K03648;K03575;K03652;K10801;K01142;K10772;K02335;K03512;K10802;K10803;K04802;K02327;K02328;K03504;K03505;K02324;K02325;K02326;K03506;K10747;K10798;K04799	K10563;K03660;K10773;K01247;K01246;K03648;K03575;K03652;K10801;K01142;K10772;K02335;K03512;K10802;K10803;K04802;K02327;K02328;K03504;K03505;K02324;K02325;K02326;K03506;K10747;K10798;K04799	K10563;K01246;K03648;K03652;K10802;K04802;K02327;K02328;K03504;K02325;K03506;K10747;K04799
ko03420	K02335;K03868;K10609;K10610;K10140;K10838;K10839;K10570;K10841;K02202;K10842;K06634;K10843;K10844;K03141;K03142;K03143;K03144;K10846;K07466;K10739;K10740;K10848;K10849;K02327;K02328;K03504;K03505;K02324;K02325;K02326;K03506;K04802;K10754;K10755;K10756;K10747	K02335;K03868;K10609;K10610;K10140;K10838;K10839;K10570;K10841;K02202;K10842;K06634;K10843;K10844;K03141;K03142;K03143;K03144;K10846;K07466;K10739;K10740;K10848;K10849;K02327;K02328;K03504;K03505;K02324;K02325;K02326;K03506;K04802;K10754;K10755;K10756;K10747	K03868;K10609;K10610;K10140;K10839;K10570;K10841;K02202;K10842;K10843;K03141;K03143;K10846;K07466;K10740;K10848;K10849;K02327;K02328;K03504;K02325;K03506;K04802;K10754;K10755;K10756;K10747
ko03430	K07456;K03111;K10858;K08734;K08737;K08735;K08736;K08739;K10754;K10755;K10756;K04802;K10746;K07466;K10739;K10740;K02327;K02328;K03504;K03505;K10747	K07456;K03111;K10858;K08734;K08737;K08735;K08736;K08739;K10754;K10755;K10756;K04802;K10746;K07466;K10739;K10740;K02327;K02328;K03504;K03505;K10747	K08737;K08736;K08739;K10754;K10755;K10756;K04802;K07466;K10740;K02327;K02328;K03504;K10747
ko03440	K03111;K03553;K02335;K03655;K10866;K10865;K10867;K07466;K10739;K10740;K04482;K08775;K10869;K10870;K10871;K10879;K10875;K02327;K02328;K03504;K03505;K10901;K03165;K08991;K10882	K03111;K03553;K02335;K03655;K10866;K10865;K10867;K07466;K10739;K10740;K04482;K08775;K10869;K10870;K10871;K10879;K10875;K02327;K02328;K03504;K03505;K10901;K03165;K08991;K10882	K03553;K03655;K10866;K10865;K07466;K10740;K04482;K08775;K10869;K10871;K10875;K02327;K02328;K03504;K10901;K03165;K08991;K10882
ko03450	K10884;K10885;K03512;K10777;K10886;K10866;K10865;K04799	K10884;K10885;K03512;K10777;K10886;K10866;K10865;K04799	K10884;K10885;K10886;K10866;K10865;K04799
ko03460	K06640;K10896;K11511;K11137;K10606;K15361;K10895;K10891;K08775;K10870;K04482;K15362;K15363;K08734;K10858;K03515;K02350;K03509;K03511;K10990;K15365;K03165;K10901;K07466;K10739;K10740;K08991;K10882;K10848;K10849;K15078	K06640;K10896;K15360;K11137;K10606;K15361;K10895;K10891;K08775;K10870;K04482;K15362;K15363;K08734;K10858;K03515;K02350;K03509;K03511;K10990;K15365;K03165;K10901;K07466;K10739;K10740;K08991;K10882;K10848;K10849;K15078	K10896;K11137;K15361;K10895;K08775;K04482;K15362;K15363;K03515;K02350;K03509;K10990;K03165;K10901;K07466;K10740;K08991;K10882;K10848;K10849;K15078
ko02010	K05643;K05655;K05656;K05658;K05663;K05665;K05666;K05674	K05643;K05655;K05656;K05658;K05663;K05665;K05666;K05674	K05643;K05656;K05658;K05663;K05665;K05666;K05674;K05677;K05681
ko03070	K03217;K03070;K03110;K03106;K03116;K03118	K03217;K03070;K03110;K03106;K03116;K03118	K03217;K03070;K03110;K03106;K03116
ko02020	K01113;K02259;K10255;K01915;K00626;K00411;K00412;K00413;K08738	K01113;K02259;K10255;K01915;K00626;K00411;K00412;K00413	K01113;K02259;K10255;K01915;K00626;K00411;K00413;K08738
ko04014	K04536;K02183;K04392;K04368;K04371;K01047;K10632;K17637;K01115;K07889	K04536;K02183;K04392;K19613;K04368;K04371;K01047;K10632;K17637;K01115;K07889	K04536;K02183;K04392;K19613;K04368;K04371;K01047;K10632;K17637;K01115;K07889
ko04015	K02183;K04392;K05759;K04368;K04371	K02183;K04392;K05759;K04368;K04371	K02183;K04392;K05759;K04368;K04371
ko04010	K06268;K04368;K04371;K04392;K04420;K04421;K04424;K04459;K04460;K03283	K06268;K04368;K04371;K04392;K04420;K04421;K04424;K04459;K04460;K03283	K06268;K04368;K04371;K04392;K04420;K04421;K04422;K04424;K04459;K04460;K03283
ko04013	K04368;K04371	K04368;K04371	K04368;K04371
ko04011	K04536;K11228;K09291;K01759	K04536;K11228;K09291;K01759	K04536;K11228;K09291;K01759
ko04012	K04515;K04368;K04371;K07203;K04688;K03083	K04515;K04368;K04371;K07203;K04688;K03083	K04515;K04368;K04371;K07203;K04688;K03083
ko04310	K08960;K03097;K03115;K03083;K04498;K04499;K04505;K04506;K03094;K04508;K03347;K03868;K04392;K04515;K06268	K08960;K03097;K03115;K03083;K04498;K04499;K04505;K04506;K04507;K03094;K04508;K03347;K03868;K04392;K04515;K06268	K08960;K03097;K03115;K03083;K04498;K04499;K04505;K04506;K04507;K03094;K04508;K03347;K03868;K04392;K04515;K06268
ko04330	K04505;K06170;K06171;K04498;K06062;K06063;K06066;K06067	K04505;K06171;K04498;K06062;K06063;K06066;K06067	K04505;K04498;K06062;K06063;K06067
ko04340	K06228;K03083;K08960;K02218	K06228;K03083;K08960;K02218	K03083;K08960;K02218
ko04350	K04681;K04683;K04498;K03868;K03347;K03094;K04371;K03456;K04382;K04688	K04681;K04683;K04498;K03868;K03347;K03094;K04371;K03456;K04382;K04688	K04681;K04683;K04498;K03868;K03347;K03094;K04371;K03456;K04382;K04688
ko04390	K04382;K03456;K04354;K06685;K06269;K08960;K06630;K03083	K04382;K03456;K04354;K06685;K06269;K08960;K06630;K03083	K04382;K03456;K04354;K06685;K06269;K08960;K06630;K03083
ko04391	K08960;K16675;K04382;K03456;K04354;K06685;K06630	K08960;K16675;K04382;K03456;K04354;K06685;K06630	K08960;K16675;K04382;K03456;K04354;K06685;K06630
ko04370	K04718;K04368;K04371;K06268;K04392	K04718;K04368;K04371;K06268;K04392	K04718;K04368;K04371;K06268;K04392
ko04630	K04498;K04706;K07203	K04498;K04706;K07203	K04498;K04706;K07203
ko04064	K04730;K04733;K05399;K10577;K04728;K03097;K03115	K04730;K04733;K05399;K10577;K04728;K03097;K03115	K04730;K04733;K05399;K10577;K04728;K03097;K03115
ko04668	K04368;K04371;K15637;K17065	K04368;K04371;K15637;K17065	K04368;K04371;K17065
ko04066	K04368;K04371;K07203;K03259;K04688;K02991;K03868;K03873;K04498;K04515;K00844;K00134;K01689;K01103;K00161;K00162	K04368;K04371;K07203;K03259;K04688;K02991;K03868;K03873;K04498;K04515;K00844;K00134;K01689;K01103;K00161;K00162	K04368;K04371;K07203;K03259;K04688;K02991;K03868;K03873;K04498;K04515;K00844;K00134;K01689;K01103;K00161;K00162
ko04068	K07198;K07199;K07200;K03875;K04498;K11838;K06276;K01110;K08960;K04368;K04371;K02206;K11434;K05868;K08336;K08341;K03781;K04564;K04728	K07198;K07199;K07200;K03875;K04498;K11838;K06276;K01110;K08960;K04368;K04371;K02206;K11434;K05868;K08341;K03781;K04564;K04728	K07198;K07199;K07200;K03875;K04498;K11838;K06276;K01110;K08960;K04368;K04371;K02206;K11434;K05868;K08341;K03781;K04564;K04728
ko04020	K05853;K05857;K04718;K15040;K05863;K02183;K04515;K06268	K05853;K05857;K04718;K15040;K05863;K02183;K04515;K06268	K05853;K05857;K04718;K15040;K05863;K02183;K04515;K06268
ko04070	K00888;K00889;K01099;K01110;K00921;K18081;K00914;K05857;K00915;K00913;K10572;K13024;K15422;K01092;K10047;K18649;K00901;K00981;K00999;K02183	K00888;K00889;K01099;K01110;K00921;K18081;K00914;K05857;K00915;K00913;K10572;K13024;K15422;K01092;K10047;K18649;K00901;K00981;K00999;K02183	K00888;K00889;K01110;K00921;K18081;K00914;K05857;K00915;K01106;K00913;K10572;K13024;K15422;K10047;K00901;K00981;K00999;K02183
ko04071	K00654;K04710;K04712;K12349;K04382;K03456;K04354;K11583;K11584;K01115;K04718;K04371;K04716;K05665;K01634;K04368;K06276;K04392;K01110	K00654;K04710;K04712;K12349;K04382;K03456;K04354;K11583;K11584;K01115;K04718;K04371;K04716;K05665;K01634;K04368;K06276;K04392;K01110	K00654;K04710;K04712;K12349;K04382;K03456;K04354;K11583;K11584;K01115;K04718;K04371;K04716;K05665;K01634;K04368;K06276;K04392;K01110
ko04024	K02183;K04515;K01115;K04392;K04368;K04371;K06269;K04498;K00232;K01539	K02183;K04515;K01115;K04392;K04368;K04371;K06269;K04498;K00232;K01539	K02183;K04515;K01115;K04392;K04368;K04371;K06269;K04498;K00232;K01539
ko04022	K06268;K01539;K05853;K06269;K02183;K15040;K05863;K04368;K04371	K06268;K01539;K05853;K06269;K02183;K15040;K05863;K04368;K04371	K06268;K01539;K05853;K06269;K02183;K15040;K05863;K04368;K04371
ko04151	K04368;K04371;K04392;K04536;K06276;K07198;K08266;K07203;K07204;K03259;K04688;K02991;K01110;K04382;K03456;K04354;K11583;K11584;K04079;K09487;K03083;K02206;K06630;K09420	K04368;K04371;K04392;K04536;K06276;K07198;K08266;K07203;K07204;K03259;K04688;K02991;K01110;K04382;K03456;K04354;K11583;K11584;K04079;K09487;K03083;K02206;K06630;K09420	K04368;K04371;K04392;K04536;K06276;K07198;K08266;K07203;K07204;K03259;K04688;K02991;K01110;K04382;K03456;K04354;K11583;K11584;K04079;K09487;K03083;K02206;K06630;K09420
ko04152	K08272;K07359;K07297;K07198;K07199;K07200;K01103;K03841;K00850;K06627;K03234;K00021;K11262;K00507;K01578;K04382;K03456;K04354;K11583;K11584;K07877;K07901;K06276;K07203;K07204;K04688	K08272;K07359;K07297;K07198;K07199;K07200;K01103;K03841;K00850;K06627;K03234;K00021;K11262;K00507;K01578;K04382;K03456;K04354;K11583;K11584;K07877;K07901;K06276;K07203;K07204;K04688	K08272;K07359;K07297;K07198;K07199;K07200;K01103;K03841;K00850;K06627;K03234;K00021;K11262;K00507;K04382;K03456;K04354;K11583;K11584;K07877;K07901;K06276;K07203;K07204;K04688
ko04150	K01110;K06276;K08266;K07203;K07204;K04688;K02991;K03259;K08269;K04371;K08272;K07198	K01110;K06276;K08266;K07203;K07204;K04688;K02991;K03259;K08269;K04371;K08272;K07198	K01110;K06276;K08266;K16186;K07203;K07204;K04688;K02991;K03259;K08269;K04371;K08272;K07198
ko04075	K13946;K14484;K14485;K14486;K14487;K14488;K14489;K14490;K14491;K14492;K14493;K14495;K14494;K12126;K14496;K14497;K14498;K14432;K14509;K14510;K14512;K14513;K14514;K14515;K14516;K13416;K13415;K14499;K14500;K14502;K14503;K14504;K14505;K14506;K13463;K13464;K13422;K14508;K14431	K13946;K14484;K14485;K14486;K14487;K14488;K14489;K14490;K14491;K14492;K14493;K14495;K14494;K12126;K14496;K14497;K14498;K14432;K14509;K14510;K14512;K14513;K14514;K14515;K14516;K13416;K13415;K14499;K14500;K14502;K14503;K14504;K14505;K14506;K13463;K13464;K13422;K14508;K14431;K13449	K13946;K14484;K14485;K14486;K14487;K14488;K14489;K14490;K14491;K14492;K14493;K14495;K14494;K14496;K14497;K14498;K14432;K14509;K14510;K14512;K14513;K14514;K14515;K14516;K13416;K13415;K14499;K14500;K14502;K14503;K14504;K14505;K14506;K13463;K13464;K13422;K14508;K14431;K13449
ko04080	K01315	K01315	0
ko04144	K01528;K00889;K01115;K04646;K11824;K11826;K11827;K10591;K12471;K19366;K05747;K05757;K05758;K05756;K05755;K05754;K03283;K10364;K10365;K18467;K18466;K18468;K11866;K07897;K12183;K12184;K12185;K12188;K12190;K12189;K12195;K12194;K12193;K12191;K12192;K15053;K12196;K12199;K12197;K12198;K19476;K12200;K19367;K17917;K07889;K12483;K12479;K07901;K07904;K12486;K12489;K12492;K12493;K18442;K18443;K07937	K01528;K00889;K01115;K04646;K11824;K11826;K11827;K10591;K12471;K19366;K05747;K05757;K05758;K05756;K05755;K05754;K03283;K10364;K10365;K18467;K18466;K18468;K11866;K07897;K12183;K12184;K12185;K12188;K12190;K12189;K12195;K12194;K12193;K12191;K12192;K15053;K12196;K12199;K12197;K12198;K19476;K12200;K19367;K17917;K07889;K12483;K12479;K07901;K07904;K10396;K12486;K12489;K12492;K12493;K18442;K18443;K07937	K01528;K00889;K01115;K04646;K11824;K11826;K11827;K10591;K12471;K19366;K05757;K05758;K05756;K05755;K03283;K10364;K10365;K18467;K18466;K18468;K11866;K07897;K12183;K12184;K12185;K12188;K12190;K12194;K12193;K12191;K12192;K12196;K12199;K12197;K12198;K19476;K12200;K17917;K07889;K12483;K12479;K07901;K07904;K10396;K12486;K12489;K12492;K12493;K18442;K18443;K07937
ko04145	K08488;K08492;K08517;K07889;K00914;K02145;K02147;K02148;K02149;K02150;K02152;K02154;K02146;K02144;K02155;K03661;K07897;K07374;K07375;K00921;K10956;K09481;K07342;K08057;K08054;K04392	K08488;K08492;K08517;K07889;K00914;K02145;K02147;K02148;K02149;K02150;K02151;K02152;K02154;K02146;K02144;K02155;K03661;K07897;K07374;K07375;K00921;K01365;K10956;K09481;K07342;K08057;K08054;K04392	K08488;K08492;K08517;K07889;K00914;K02145;K02147;K02148;K02149;K02150;K02151;K02152;K02154;K02146;K02144;K02155;K03661;K07897;K07374;K07375;K00921;K01365;K10956;K09481;K08057;K08054;K04392
ko04142	K02154;K02146;K02144;K02155;K03661;K01363;K01373;K01366;K01369;K12309;K01205;K12373;K01052;K06129;K14379;K01444;K12382;K01074;K12385;K12386;K12347;K05656;K10532;K04646;K12391;K12392;K12393;K12394;K12396;K12397;K12398;K12399;K12400;K12402;K19363	K02154;K02146;K02144;K02155;K03661;K01363;K01373;K01366;K01365;K01369;K12309;K01205;K12373;K01052;K06129;K14379;K01444;K12382;K01074;K12385;K12386;K12347;K05656;K10532;K04646;K12391;K12392;K12393;K12394;K12396;K12397;K12398;K12399;K12400;K12402;K12403	K02154;K02146;K02144;K02155;K03661;K01363;K01373;K01366;K01365;K08568;K01369;K01279;K12309;K01205;K12373;K01052;K06129;K14379;K01444;K12382;K01074;K12385;K12386;K12347;K05656;K10532;K04646;K12391;K12392;K12393;K12394;K12396;K12397;K12398;K12399;K12400;K12402;K12403;K19363
ko04146	K13335;K13336;K13337;K13338;K13339;K13341;K13342;K13343;K13344;K13345;K13346;K06664;K13347;K13348;K13352;K13354;K12261;K00477;K00232;K07513;K13237;K12663;K01897;K03426;K01578;K13356;K00869;K00830;K00031;K00306;K01640;K11517;K03781;K04565;K04564;K00106;K11147	K13335;K13336;K13337;K13338;K13339;K13341;K13342;K13343;K13344;K13345;K13346;K06664;K13347;K13348;K13354;K12261;K00477;K00232;K07513;K13237;K12663;K01897;K03426;K01578;K13356;K00869;K00830;K00031;K00306;K01640;K11517;K03781;K04565;K04564;K00106;K11147	K13335;K13336;K13337;K05677;K13338;K13339;K13342;K13343;K13344;K13345;K13346;K13347;K13348;K13352;K13354;K12261;K00477;K00232;K07513;K13237;K12663;K01897;K03426;K13356;K00869;K00830;K00031;K00306;K01640;K11517;K03781;K04565;K04564;K00106;K11147
ko04140	K07198;K08269;K08331;K08332;K08333;K08334;K00914;K08336;K08337;K17888;K08339;K17890;K08341;K08342;K08343	K07198;K08269;K08331;K08332;K08333;K08334;K00914;K08337;K17888;K08339;K17890;K08341;K08342;K08343	K07198;K08269;K08331;K08332;K08333;K08334;K00914;K08337;K17888;K08339;K17890;K08341;K08342;K08343
ko04810	K04368;K04371;K04392;K06269;K00889;K00921;K05747;K05749;K05750;K05754;K05755;K05756;K05757;K05758;K05759;K05765;K05766;K05768	K04368;K04371;K04392;K06269;K00889;K00921;K05747;K05749;K05750;K05754;K05755;K05756;K05757;K05758;K05759;K05765;K05766;K05768	K04368;K04371;K04392;K06269;K00889;K00921;K05749;K05750;K05755;K05756;K05757;K05758;K05759;K05765;K05766;K05768
ko04110	K04681;K06067;K06620;K04683;K03083;K02206;K03094;K03347;K03868;K03875;K06627;K02213;K06628;K02214;K05868;K06630;K06632;K06634;K02202;K03348;K03349;K03350;K03351;K03352;K03353;K03354;K03355;K03357;K03363;K02365;K06636;K06669;K06671;K06670;K08866;K02178;K02180;K06638;K02537;K13728;K03364;K06640;K04728;K04498;K04802;K02603;K02604;K02605;K02606;K02607;K02608;K02540;K02541;K02212;K02209;K02542;K02210	K04681;K06067;K06620;K04683;K03083;K02206;K03094;K03347;K03868;K03875;K06627;K02213;K06628;K02214;K05868;K06630;K06632;K06634;K02202;K03348;K03349;K03350;K03351;K03352;K03353;K03354;K03355;K03357;K03363;K02365;K06636;K06669;K06671;K06670;K08866;K02178;K02180;K06638;K02537;K13728;K03364;K06640;K04728;K04498;K04802;K02603;K02604;K02605;K02606;K02607;K02608;K02540;K02541;K02212;K02209;K02542;K02210	K04681;K06067;K06620;K04683;K03083;K02206;K03094;K03347;K03868;K03875;K06627;K05868;K06630;K02202;K03348;K03349;K03350;K03351;K03352;K03353;K03354;K03355;K03357;K12456;K03363;K02365;K06636;K06669;K06670;K02178;K02180;K06638;K03364;K04728;K04498;K04802;K02604;K02606;K02540;K02541;K02209;K02542;K02210
ko04111	K02213;K02603;K02604;K02605;K02606;K02607;K02608;K02540;K02541;K02212;K02209;K02542;K02210;K02214;K06628;K03348;K03349;K03350;K03351;K03352;K03353;K03354;K03355;K03357;K03363;K03094;K03347;K03868;K08866;K02537;K02178;K02180;K02365;K04354;K04382;K03456;K06685;K03364;K02219;K02516;K02830;K06662;K06636;K06669;K06670;K06671;K06672;K06674;K06675;K06676;K06677;K06678	K02213;K02603;K02604;K02605;K02606;K02607;K02608;K02540;K02541;K02212;K02209;K02542;K02210;K02214;K06628;K03348;K03349;K03350;K03351;K03352;K03353;K03354;K03355;K03357;K03363;K03094;K03347;K03868;K08866;K02537;K02178;K02180;K02365;K04354;K04382;K03456;K06685;K03364;K02219;K02516;K02830;K06662;K06636;K06669;K06670;K06671;K06672;K06674;K06675;K06676;K06677;K06678	K02604;K02606;K02540;K02541;K02209;K02542;K02210;K03348;K03349;K03350;K03351;K03352;K03353;K03354;K03355;K03357;K03363;K03094;K03347;K03868;K02178;K02180;K02365;K04354;K04382;K03456;K06685;K03364;K02220;K06662;K06636;K06669;K06670;K06672;K06674
ko04112	K01338;K03531;K02563;K03544;K01358	K01338;K03531;K02563;K03544;K01358	K01338;K03531;K02563;K03544;K01358
ko04113	K12761;K02213;K02603;K02604;K02605;K02606;K02607;K02608;K02540;K02541;K02212;K02209;K02542;K02210;K06628;K02214;K10878;K06269;K02830;K06662;K02365;K06636;K06669;K06671;K02537;K03348;K03349;K03350;K03351;K03352;K03353;K03354;K03355;K03357;K03363;K02178;K11584;K04382;K03456	K12761;K02213;K02603;K02604;K02605;K02606;K02607;K02608;K02540;K02541;K02212;K02209;K02542;K02210;K06628;K02214;K10878;K06269;K02830;K06662;K02365;K06636;K06669;K06671;K02537;K03348;K03349;K03350;K03351;K03352;K03353;K03354;K03355;K03357;K03363;K02178;K11584;K04382;K03456	K12761;K02604;K02606;K02540;K02541;K02209;K02542;K02210;K10878;K06269;K06662;K02365;K06636;K06669;K03348;K03349;K03350;K03351;K03352;K03353;K03354;K03355;K03357;K03363;K02178;K11584;K04382;K03456
ko04114	K04368;K04371;K06630;K02206;K06269;K03868;K03347;K03094;K03348;K03349;K03350;K03351;K03352;K03353;K03354;K03355;K03357;K03363;K02365;K06636;K06669;K02178;K02537;K13728;K11584;K03456;K04382;K02183;K06268;K04515	K04368;K04371;K06630;K02206;K06269;K03868;K03347;K03094;K03348;K03349;K03350;K03351;K03352;K03353;K03354;K03355;K03357;K03363;K02365;K06636;K06669;K02178;K02537;K13728;K11584;K03456;K04382;K02183;K06268;K04515	K04368;K04371;K06630;K02206;K06269;K03868;K03347;K03094;K03348;K03349;K03350;K03351;K03352;K03353;K03354;K03355;K03357;K12456;K03363;K02365;K06636;K06669;K02178;K11584;K03456;K04382;K02183;K06268;K04515
ko04210	K08738;K04728;K04730;K04733;K06268	K04728;K04730;K04733;K06268	K08738;K04728;K04730;K04733;K06268
ko04115	K04728;K06640;K02206;K05868;K10134;K04506;K08738;K10140;K10808;K01110;K10143;K10144	K04728;K06640;K02206;K05868;K10134;K04506;K10140;K10808;K01110;K10143;K10144	K04728;K02206;K05868;K10134;K04506;K08738;K10140;K01110;K10143;K10144
ko04510	K06269;K06276;K03083;K01110;K04392;K04368;K04371	K06269;K06276;K03083;K01110;K04392;K04368;K04371	K06269;K06276;K03083;K01110;K04392;K04368;K04371
ko04520	K04392;K05747;K06085;K03097;K03115;K04371;K04498	K04392;K05747;K06085;K03097;K03115;K04371;K04498	K04392;K06085;K03097;K03115;K04371;K04498
ko04530	K04382;K03456;K04354;K03097;K03115;K04424;K06100;K06110;K06111;K01110	K04382;K03456;K04354;K03097;K03115;K04424;K06100;K06110;K06111;K01110	K04382;K03456;K04354;K03097;K03115;K04424;K06100;K06110;K06111;K01110
ko04540	K04368;K04371;K04420;K07374;K07375	K04368;K04371;K04420;K07374;K07375	K04368;K04371;K04420;K07374;K07375
ko04550	K04368;K04371;K03083;K14439;K11138	K04368;K04371;K03083;K14439;K11138	K04368;K04371;K03083;K14439
ko04610	K01315	K01315	0
ko04611	K06269;K04371	K06269;K04371	K06269;K04371
ko04620	K05399;K04392;K04733;K04730;K04368;K04371	K05399;K04392;K04733;K04730;K04368;K04371	K05399;K04392;K04733;K04730;K04368;K04371
ko04621	K04371;K12795;K04079;K09487	K04371;K12795;K04079;K09487	K04371;K12795;K04079;K09487
ko04622	K08339;K08336;K12655;K11594;K09578;K00863	K08339;K12655;K11594;K09578;K00863	K08339;K12655;K11594;K09578;K00863
ko04623	K03018;K03021;K03023;K03026;K14721;K03027;K03019;K03020;K03022;K03024;K03025;K03013;K03014;K03016;K03007	K03018;K03021;K03023;K03026;K14721;K03027;K03019;K03020;K03022;K03024;K03025;K03013;K03014;K03016	K03018;K03023;K03026;K14721;K03027;K03020;K03024;K03025;K03013;K03014;K03016
ko04650	K04392;K04368;K04371;K06268	K04392;K04368;K04371;K06268	K04392;K04368;K04371;K06268
ko04612	K03283;K09489;K04079;K08054;K08057;K08059;K01369;K01363;K08064;K08065;K08066	K03283;K09489;K04079;K08054;K08057;K08059;K01369;K01363;K01365;K08064;K08065;K08066	K03283;K09489;K04079;K08054;K08057;K08059;K01369;K01363;K01365;K08064;K08065;K08066
ko04660	K06268;K04368;K04371;K06276;K03083	K06268;K04368;K04371;K06276;K03083	K06268;K04368;K04371;K06276;K03083
ko04662	K04392;K06268;K04368;K04371;K03083	K04392;K06268;K04368;K04371;K03083	K04392;K06268;K04368;K04371;K03083
ko04664	K06276;K04392;K04368;K04371	K06276;K04392;K04368;K04371	K06276;K04392;K04368;K04371
ko04666	K04688;K04368;K04371;K01115;K04718;K05768;K05747;K05754;K05755;K05756;K05757;K05758;K04392;K05765;K00889	K04688;K04368;K04371;K01115;K04718;K05768;K05747;K05754;K05755;K05756;K05757;K05758;K04392;K05765;K00889	K04688;K04368;K04371;K01115;K04718;K05768;K05755;K05756;K05757;K05758;K04392;K05765;K00889
ko04670	K04392	K04392	K04392
ko04062	K04368;K04371;K03083;K04392;K05747;K04536	K04368;K04371;K03083;K04392;K05747;K04536	K04368;K04371;K03083;K04392;K04536
ko04911	K01539;K04515;K18211	K01539;K04515;K18211	K01539;K04515;K18211
ko04910	K06276;K03083;K06269;K02183;K00688;K07192;K07195;K11262;K00844;K07198;K07199;K07200;K03841;K07203;K07204;K04688;K02991;K03259;K04368;K04371	K06276;K03083;K06269;K02183;K00688;K07192;K07195;K11262;K00844;K07198;K07199;K07200;K03841;K07203;K07204;K04688;K02991;K03259;K04368;K04371	K06276;K03083;K06269;K02183;K00688;K07195;K11262;K00844;K07198;K07199;K07200;K03841;K07203;K07204;K04688;K02991;K03259;K04368;K04371
ko04922	K17491;K15423;K04498;K06268;K04515;K11434;K02183;K00688;K07198;K07199;K07200;K11262;K01834;K00873;K00161;K00162;K00016	K17491;K15423;K04498;K06268;K04515;K11434;K02183;K00688;K07198;K07199;K07200;K11262;K01834;K00873;K00161;K00162;K00016	K17491;K15423;K04498;K06268;K04515;K11434;K02183;K00688;K07198;K07199;K07200;K11262;K01834;K00873;K00161;K00162;K00016
ko04920	K07203;K01897;K07198;K07199;K07200;K07297;K07359	K07203;K01897;K07198;K07199;K07200;K07297;K07359	K07203;K01897;K07198;K07199;K07200;K07297;K07359
ko03320	K00507;K08762;K01897;K07513;K00232;K00249;K06276;K08770;K00864	K00507;K08762;K01897;K07513;K00232;K00249;K06276;K08770;K00864	K00507;K08762;K01897;K07513;K00232;K00249;K06276;K08770;K00864
ko04912	K02183;K04515;K04420;K04421;K01115;K04368;K04371	K02183;K04515;K04420;K04421;K01115;K04368;K04371	K02183;K04515;K04420;K04421;K01115;K04368;K04371
ko04915	K04079;K09487;K09571;K03283;K04368;K04371;K02183	K04079;K09487;K09571;K03283;K04368;K04371;K02183	K04079;K09487;K09571;K03283;K04368;K04371;K02183
ko04914	K02206;K06627;K04079;K04368;K04371;K05868;K02178;K06638;K02537;K13728;K03364;K03348;K03349;K03350;K03351;K03352;K03353;K03354;K03355;K03357	K02206;K06627;K04079;K04368;K04371;K05868;K02178;K06638;K02537;K13728;K03364;K03348;K03349;K03350;K03351;K03352;K03353;K03354;K03355;K03357	K02206;K06627;K04079;K04368;K04371;K05868;K02178;K06638;K03364;K03348;K03349;K03350;K03351;K03352;K03353;K03354;K03355;K03357;K12456
ko04917	K00965;K04368;K04371;K03083	K00965;K04368;K04371;K03083	K00965;K04368;K04371;K03083
ko04921	K04368;K04371;K03234;K02183;K06268;K07359;K07198;K07199;K07200;K04515;K06269	K04368;K04371;K03234;K02183;K06268;K07359;K07198;K07199;K07200;K04515;K06269	K04368;K04371;K03234;K02183;K06268;K07359;K07198;K07199;K07200;K04515;K06269
ko04918	K09490;K09487;K08054;K01539;K00432;K00383	K09490;K09487;K08054;K01539;K00432;K00383	K09490;K09487;K08054;K01539;K00432;K00383
ko04919	K04368;K04371;K04650;K11644;K06067;K06062;K04498;K15164;K15156;K15133;K15170;K05857;K01114;K01539;K06276;K03083;K07203	K04368;K04371;K04650;K11644;K06067;K06062;K04498;K15164;K15156;K15133;K15170;K05857;K01114;K01539;K06276;K03083;K07203	K04368;K04371;K04650;K11644;K06067;K06062;K04498;K15164;K15156;K15133;K15170;K05857;K01114;K01539;K06276;K03083;K07203
ko04916	K04498;K03083;K04368;K04371;K02183;K04515	K04498;K03083;K04368;K04371;K02183;K04515	K04498;K03083;K04368;K04371;K02183;K04515
ko04924	K02183;K06268;K01363	K02183;K06268;K01363	K02183;K06268;K01363
ko04614	K01322;K01392;K01285	K01322;K01392;K01285	K01322;K01392;K01285
ko04925	K02183;K04515	K02183;K04515	K02183;K04515
ko04260	K00411;K00412;K00413;K00417;K02262;K02256;K02261;K02265;K02266;K02267;K01539	K00411;K00412;K00413;K00417;K02262;K02256;K02261;K02265;K02266;K02267;K01539	K00411;K00413;K00417;K00419;K02256;K02261;K02265;K02266;K02267;K01539
ko04261	K01539;K02183;K04515;K04382;K03456;K04354;K11583;K11584;K06269;K04371	K01539;K02183;K04515;K04382;K03456;K04354;K11583;K11584;K06269;K04371	K01539;K02183;K04515;K04382;K03456;K04354;K11583;K11584;K06269;K04371
ko04270	K01047;K02183;K04368;K04371;K06269	K01047;K02183;K04368;K04371;K06269	K01047;K02183;K04368;K04371;K06269
ko04970	K02183;K01539;K13899	K02183;K01539	K02183;K01539;K13899
ko04971	K02183;K04515;K01539	K02183;K04515;K01539	K02183;K04515;K01539
ko04972	K07901;K07904;K04392;K01047;K05853;K01539	K07901;K07904;K04392;K01047;K05853;K01539	K07901;K07904;K04392;K01047;K05853;K01539
ko04976	K00021;K05666;K05658;K01539	K00021;K05666;K05658;K01539	K00021;K05666;K05681;K05658;K01539
ko04973	K01176;K01539;K00844	K01176;K01539;K00844	K01176;K01539;K00844
ko04974	K01539;K14207;K01285;K01278	K01539;K14207;K01285;K01278	K01539;K14207;K01285;K01278
ko04975	K01047;K14455;K14457;K11155	K01047;K14455;K14457	K01047;K14455;K14457;K11155
ko04977	K14617;K05665	K14617;K05665	K05665
ko04978	K01539;K00510;K12347;K00522;K14685;K14686;K07213	K01539;K00510;K12347;K00522;K14685;K14686;K07213	K01539;K00510;K12347;K00522;K14685;K14686;K07213
ko04962	K12462;K07904;K10418;K06027;K07889	K12462;K07904;K10418;K06027;K07889	K12462;K07904;K10418;K06027;K07889
ko04960	K01539;K06276;K04371	K01539;K06276;K04371	K01539;K06276;K04371
ko04961	K01528;K11824;K11826;K11827;K04646;K07904;K01539	K01528;K11824;K11826;K11827;K04646;K07904;K01539	K01528;K11824;K11826;K11827;K04646;K07904;K01539
ko04964	K01539;K00261;K00025	K01539;K00261;K00025	K01539;K00261;K00025
ko04966	K02145;K02147;K02152;K02148;K02149;K02150;K02154;K02155;K02146	K02145;K02147;K02152;K02148;K02149;K02150;K02151;K02154;K02155;K02146	K02145;K02147;K02152;K02148;K02149;K02150;K02151;K02154;K02155;K02146
ko04724	K14207;K06268;K01115;K04371;K04536;K01915	K14207;K06268;K01115;K04371;K04536;K01915	K14207;K06268;K01115;K04371;K04536;K01915
ko04727	K14207;K01580;K15015;K08341;K06027;K15376;K04536;K01915	K14207;K01580;K15015;K08341;K06027;K15376;K04536;K01915	K14207;K01580;K15015;K08341;K06027;K15376;K04536;K01915
ko04725	K04536;K04368;K04371;K04515	K04536;K04368;K04371;K04515	K04536;K04368;K04371;K04515
ko04728	K02183;K04515;K06269;K04536;K04382;K03456;K04354;K11583;K11584;K03083;K00545	K02183;K04515;K06269;K04536;K04382;K03456;K04354;K11583;K11584;K03083;K10396;K00545	K02183;K04515;K06269;K04536;K04382;K03456;K04354;K11583;K11584;K03083;K10396
ko04726	K04371;K04536;K04368	K04371;K04536;K04368	K04371;K04536;K04368
ko04720	K06269;K04515;K06268;K02183;K04498;K04368;K04371	K06269;K04515;K06268;K02183;K04498;K04368;K04371	K06269;K04515;K06268;K02183;K04498;K04368;K04371
ko04730	K03456;K04382;K04368;K04371	K03456;K04382;K04368;K04371	K03456;K04382;K04368;K04371
ko04723	K04536;K04371;K15015	K04536;K04371;K15015	K13985;K04536;K04371;K15015
ko04721	K15015;K08486;K15292;K18211;K06027;K15296;K01528;K04646;K11824;K11826;K11827;K02145;K02147;K02148;K02149;K02150;K02152;K02154;K02146;K02144;K02155;K03661	K15015;K08486;K15292;K18211;K06027;K15296;K01528;K04646;K11824;K11826;K11827;K02145;K02147;K02148;K02149;K02150;K02151;K02152;K02154;K02146;K02144;K02155;K03661	K15015;K08486;K15292;K18211;K06027;K15296;K01528;K04646;K11824;K11826;K11827;K02145;K02147;K02148;K02149;K02150;K02151;K02152;K02154;K02146;K02144;K02155;K03661
ko04722	K04368;K04371;K04421;K03083;K06276;K02183;K04515;K12462;K04392;K06630;K04730;K04733;K04505	K04368;K04371;K04421;K03083;K06276;K02183;K04515;K12462;K04392;K06630;K04730;K04733;K04505	K04368;K04371;K04421;K03083;K06276;K02183;K04515;K12462;K04392;K06630;K04730;K04733;K04505
ko04744	K04536;K02183	K04536;K02183	K04536;K02183
ko04745	K02183;K04515	K02183;K04515	K02183;K04515
ko04740	K04515;K02183	K04536;K04515;K02183	K04536;K04515;K02183
ko04742	K04536	K04536	K04536
ko04750	K06269;K02183;K04515	K06269;K02183;K04515	K06269;K02183;K04515
ko04320	K04368;K04371;K02184	K04368;K04371;K02184	K04368;K04371;K02184
ko04360	K04392;K06268;K04371;K03083;K05765	K04392;K06268;K04371;K03083;K05765	K04392;K06268;K04371;K03083;K05765
ko04380	K04371;K04368;K04392;K06268;K14379	K04371;K04368;K04392;K06268;K14379	K04371;K04368;K04392;K06268;K14379
ko04710	K08960;K02295;K03868;K03347;K03094;K07198;K07199;K07200	K08960;K02295;K03868;K03347;K03094;K07198;K07199;K07200	K08960;K03868;K03347;K03094;K07198;K07199;K07200
ko04713	K02183;K04515;K04371;K04536	K02183;K04515;K04371;K04536	K02183;K04515;K04371;K04536
ko04711	K08960;K03083	K08960;K03083	K08960;K03083
ko04712	K12121;K12120;K12126;K12125;K12129;K12130;K12133;K03097;K03115;K12127;K12115;K12124;K00660;K12118;K12119;K10143;K12116;K16222;K16223;K16240;K16241	K12121;K12120;K12126;K12125;K12129;K12130;K12133;K03097;K03115;K12127;K12115;K12124;K00660;K12118;K12119;K10143;K12116;K16223;K16240;K16241	K12121;K12120;K12125;K12129;K12130;K12133;K03097;K03115;K16221;K12127;K12115;K12124;K00660;K12118;K12119;K10143;K12116;K16223;K16240;K16241
ko04626	K13412;K13447;K05391;K02183;K13448;K13427;K13420;K13416;K13414;K04368;K13413;K13424;K13425;K16224;K00864;K13428;K13436;K13456;K13457;K13458;K12795;K09487;K04079;K13459;K13430;K18875;K18834;K18835;K13466;K13429	K13412;K13447;K05391;K02183;K13448;K13427;K13420;K13416;K13417;K13414;K04368;K13413;K13424;K13425;K16224;K00864;K13449;K13428;K13436;K13456;K13457;K13458;K12795;K09487;K04079;K13459;K13430;K18875;K18834;K18835;K13466;K13429	K13412;K13447;K05391;K02183;K13448;K13420;K13416;K13414;K04368;K13413;K13424;K13425;K16224;K00864;K13449;K13436;K13456;K13457;K13458;K12795;K09487;K04079;K13459;K13430;K18875;K18835;K13466;K13429
ko05200	K03083;K04536;K01110;K07203;K04368;K04371;K09291;K04392;K06620;K02219;K03875;K02206;K06067;K08734;K08735;K08736;K08737;K08775;K04482;K08738;K03873;K03868;K01679;K04498;K06228;K04079;K09487	K03083;K04536;K01110;K07203;K04368;K04371;K09291;K04392;K06620;K02219;K03875;K02206;K06067;K08734;K08735;K08736;K08737;K08775;K04482;K03873;K03868;K01679;K04498;K06228;K04079;K09487	K03083;K04536;K01110;K07203;K04368;K04371;K09291;K04392;K06620;K03875;K02206;K06067;K08736;K08737;K08775;K04482;K08738;K03873;K03868;K01679;K04498;K04079;K09487
ko05230	K00873;K00161;K00162;K11416;K04368;K04371;K00036;K00844;K00850;K01834;K01110;K07203	K00873;K00161;K00162;K11416;K04368;K04371;K00036;K00844;K00850;K01834;K01110;K07203	K00873;K00161;K00162;K11416;K04368;K04371;K00036;K00844;K00850;K01834;K01110;K07203
ko05231	K04368;K04371;K06276;K07203;K04688;K00889;K05747;K04392;K01115;K15377;K08202;K14156;K00968;K00901	K04368;K04371;K06276;K07203;K04688;K00889;K05747;K04392;K01115;K15377;K08202;K14156;K00968;K00901	K04368;K04371;K06276;K07203;K04688;K00889;K04392;K01115;K15377;K14156;K00968;K00901
ko05202	K06067;K11644;K04650;K15188;K11253;K13105;K12823;K04728;K15622;K13098;K15627	K06067;K11644;K04650;K15188;K15616;K11253;K13105;K12823;K04728;K15622;K13098;K15627	K06067;K11644;K04650;K15188;K11253;K13105;K12823;K04728;K15622;K13098
ko05206	K01110;K17398;K04498;K07203;K07204;K13863;K00558;K06620;K04728;K11592;K10577;K05658;K05665;K04368;K11430	K01110;K17398;K04498;K07203;K07204;K13863;K00558;K06620;K04728;K11592;K10577;K05658;K05665;K04368;K11430	K01110;K17398;K04498;K07203;K07204;K13863;K00558;K06620;K04728;K11592;K10577;K05658;K05665;K04368;K11430
ko05205	K04368;K04371;K04392;K06269;K04515;K12823;K07203;K06276;K04688;K02991;K07964	K04368;K04371;K04392;K06269;K04515;K12823;K07203;K06276;K04688;K02991;K07964;K01365	K04368;K04371;K04392;K06269;K04515;K12823;K07203;K06276;K04688;K02991;K07964;K01365
ko05204	K01014;K00799;K00079;K00699;K00121	K07424;K01014;K00799;K00079;K00699;K00121	K00799;K00079;K00699;K00121
ko05203	K04371;K10610;K06630;K02206;K11594;K11252;K11254;K03120;K11838;K06063;K03141;K03142;K03143;K03144;K03136;K03137;K15979;K04498;K03124;K06627;K03875;K02146;K03062;K04681;K10691;K11643;K06067;K11407;K11418;K00873;K06062;K03122;K03123;K04392;K05768;K03363;K06638;K15305;K15306	K04371;K10610;K06630;K02206;K11594;K11252;K11254;K03120;K11838;K06063;K03141;K03142;K03143;K03144;K03136;K03137;K15979;K04498;K03124;K06627;K03875;K02146;K03062;K04681;K10691;K11643;K06067;K11407;K11418;K00873;K06062;K03122;K03123;K04392;K05768;K03363;K06638;K15305;K15306	K04371;K10610;K06630;K02206;K11594;K11252;K11254;K11838;K06063;K03141;K03143;K03136;K03137;K15979;K04498;K03124;K06627;K03875;K02146;K03062;K04681;K10691;K11643;K06067;K11407;K11418;K00873;K06062;K03122;K04392;K05768;K03363;K06638;K15305;K15306
ko05210	K03083;K04368;K04371;K04392;K08734;K08735;K08736;K08737;K08738	K03083;K04368;K04371;K04392;K08734;K08735;K08736;K08737	K03083;K04368;K04371;K04392;K08736;K08737;K08738
ko05212	K04392;K04368;K04371;K06620;K08775;K04482	K04392;K04368;K04371;K06620;K08775;K04482	K04392;K04368;K04371;K06620;K08775;K04482
ko05214	K02183;K04515;K04368;K04371;K07203;K01110;K06620	K02183;K04515;K04368;K04371;K07203;K01110;K06620	K02183;K04515;K04368;K04371;K07203;K01110;K06620
ko05216	K09291;K04368;K04371	K09291;K04368;K04371	K09291;K04368;K04371
ko05221	K07203;K04688;K04368;K04371	K07203;K04688;K04368;K04371	K07203;K04688;K04368;K04371
ko05220	K04368;K04371;K06620;K06067	K04368;K04371;K06620;K06067	K04368;K04371;K06620;K06067
ko05217	K06228;K03083	K06228;K03083	K03083
ko05218	K04368;K04371;K01110;K06620	K04368;K04371;K01110;K06620	K04368;K04371;K01110;K06620
ko05211	K03873;K03868;K04498;K04368;K04371;K04392;K01679	K03873;K03868;K04498;K04368;K04371;K04392;K01679	K03873;K03868;K04498;K04368;K04371;K04392;K01679
ko05219	K04368;K04371;K06620	K04368;K04371;K06620	K04368;K04371;K06620
ko05215	K02206;K06620;K01110;K06276;K03083;K04498;K07203;K04368;K04371;K04079;K09487	K02206;K06620;K01110;K06276;K03083;K04498;K07203;K04368;K04371;K04079;K09487	K02206;K06620;K01110;K06276;K03083;K04498;K07203;K04368;K04371;K04079;K09487
ko05213	K01110;K06276;K04368;K04371;K08734;K03083	K01110;K06276;K04368;K04371;K08734;K03083	K01110;K06276;K04368;K04371;K03083
ko05222	K01522;K08738;K02219;K03875;K02206;K06620;K01110	K01522;K02219;K03875;K02206;K06620;K01110	K01522;K08738;K03875;K02206;K06620;K01110
ko05223	K01522;K06620;K06276;K04368;K04371	K01522;K06620;K06276;K04368;K04371	K01522;K06620;K06276;K04368;K04371
ko05322	K11251;K11252;K11253;K11254;K11086;K11087;K11088;K11090	K11251;K11252;K11253;K11254;K11086;K11087;K11088;K11090	K11251;K11252;K11253;K11254;K11086;K11088;K11090
ko05323	K02145;K02147;K02148;K02149;K02150;K02152;K02154;K02146;K02144;K02155;K03661;K14379	K02145;K02147;K02148;K02149;K02150;K02151;K02152;K02154;K02146;K02144;K02155;K03661;K14379;K01365	K02145;K02147;K02148;K02149;K02150;K02151;K02152;K02154;K02146;K02144;K02155;K03661;K14379;K01365
ko05340	K01488;K03648	K01488;K03648	K01488;K03648
ko05010	K04532;K00134;K06170;K04505;K06171;K01408;K03942;K03943;K03949;K03950;K03952;K03953;K03955;K11352;K11353;K03963;K03965;K03966;K03934;K03935;K03936;K03937;K03938;K03940;K03941;K00234;K00235;K00411;K00412;K00413;K00417;K02262;K02256;K02261;K02265;K02266;K02267;K02132;K02133;K02136;K02134;K02135;K02138;K02137;K02183;K06268;K08738;K04371;K05853;K08852;K03083	K04532;K00134;K04505;K06171;K01408;K03942;K03943;K03949;K03950;K03952;K03953;K03955;K11352;K11353;K03963;K03965;K03966;K03934;K03936;K03937;K03938;K03940;K03941;K00234;K00411;K00412;K00413;K00417;K02262;K02256;K02261;K02265;K02266;K02267;K02132;K02133;K02136;K02134;K02138;K02137;K02183;K06268;K04371;K05853;K08852;K03083	K04532;K00134;K04505;K01408;K03942;K03943;K03945;K03946;K03949;K03950;K03952;K03953;K03955;K11352;K11353;K03963;K03965;K03966;K03934;K03935;K03936;K03937;K03940;K03941;K00234;K00235;K00411;K00413;K00417;K00419;K02256;K02261;K02265;K02266;K02267;K02132;K02133;K02136;K02134;K02138;K02137;K02183;K06268;K08738;K04371;K05853;K08852;K03083
ko05012	K03178;K04554;K10578;K10575;K03878;K03880;K03883;K03942;K03943;K03949;K03950;K03952;K03953;K03955;K11352;K11353;K03963;K03965;K03966;K03934;K03935;K03936;K03937;K03938;K03940;K03941;K00234;K00235;K00411;K00412;K00413;K00417;K02262;K02256;K02261;K02265;K02266;K02267;K02132;K02133;K02136;K02134;K02135;K02138;K02137;K08669;K15040;K05863;K08738	K03178;K04554;K10578;K10575;K03878;K03879;K03880;K03881;K03883;K03942;K03943;K03949;K03950;K03952;K03953;K03955;K11352;K11353;K03963;K03965;K03966;K03934;K03936;K03937;K03938;K03940;K03941;K00234;K00411;K00412;K00413;K00417;K02262;K02256;K02261;K02265;K02266;K02267;K02132;K02133;K02136;K02134;K02138;K02137;K08669;K15040;K05863	K03178;K04554;K10578;K10575;K03942;K03943;K03945;K03946;K03949;K03950;K03952;K03953;K03955;K11352;K11353;K03963;K03965;K03966;K03934;K03935;K03936;K03937;K03940;K03941;K00234;K00235;K00411;K00413;K00417;K00419;K02256;K02261;K02265;K02266;K02267;K02132;K02133;K02136;K02134;K02138;K02137;K08669;K15040;K05863;K08738
ko05014	K06268;K08738;K04565;K11518;K04569;K03781;K04392	K06268;K04565;K11518;K04569;K03781;K04392	K06268;K08738;K04565;K11518;K04569;K03781;K04392
ko05016	K04646;K11824;K11826;K11827;K11644;K06067;K03006;K03010;K03011;K03012;K03013;K03014;K03015;K03016;K03007;K03008;K04498;K03129;K03120;K04565;K04564;K03942;K03943;K03949;K03950;K03952;K03953;K03955;K11352;K11353;K03963;K03965;K03966;K03934;K03935;K03936;K03937;K03938;K03940;K03941;K00234;K00235;K00411;K00412;K00413;K00417;K02262;K02256;K02261;K02265;K02266;K02267;K02132;K02133;K02136;K02134;K02135;…	K04646;K11824;K11826;K11827;K11644;K06067;K03006;K03010;K03011;K03012;K03013;K03014;K03015;K03016;K03008;K04498;K03129;K03120;K04565;K04564;K03942;K03943;K03949;K03950;K03952;K03953;K03955;K11352;K11353;K03963;K03965;K03966;K03934;K03936;K03937;K03938;K03940;K03941;K00234;K00411;K00412;K00413;K00417;K02262;K02256;K02261;K02265;K02266;K02267;K02132;K02133;K02136;K02134;K02138;K02137;K15040;K05863	K04646;K11824;K11826;K11827;K11644;K06067;K03006;K03010;K03011;K03012;K03013;K03014;K03015;K03016;K03008;K10408;K04498;K03129;K04565;K04564;K03942;K03943;K03945;K03946;K03949;K03950;K03952;K03953;K03955;K11352;K11353;K03963;K03965;K03966;K03934;K03935;K03936;K03937;K03940;K03941;K00234;K00235;K00411;K00413;K00417;K00419;K02256;K02261;K02265;K02266;K02267;K02132;K02133;K02136;K02134;K02138;K02137;…
ko05020	K09490;K04565;K09553;K04368;K04371	K09490;K04565;K09553;K04368;K04371	K09490;K04565;K09553;K04368;K04371
ko05031	K04515;K02183;K06269;K06268	K04515;K02183;K06269;K06268	K04515;K02183;K06269;K06268
ko05032	K15015;K04536	K15015;K04536	K15015;K04536
ko05033	K15015	K15015	K15015
ko05034	K06067;K11407;K11418;K11251;K11252;K11253;K11254;K11303;K04536;K04368;K04371;K02183;K07359;K06269	K06067;K11407;K11418;K11251;K11252;K11253;K11254;K11303;K04536;K04368;K04371;K02183;K07359;K06269	K06067;K11407;K11418;K11251;K11252;K11253;K11254;K11303;K04536;K04368;K04371;K02183;K07359;K06269
ko05410	K07198;K07199;K07200	K07198;K07199;K07200	K07198;K07199;K07200
ko05416	K04392;K03260;K08738	K04392;K03260	K04392;K03260;K08738
ko04930	K04371;K07203;K00844;K00873	K04371;K07203;K00844;K00873	K04371;K07203;K00844;K00873
ko04940	K01580;K04077	K01580;K04077	K01580;K04077
ko04932	K03083;K07297;K07198;K07199;K07200;K04392;K08852;K03237;K08738;K03942;K03943;K03949;K03950;K03952;K03953;K03955;K11352;K11353;K03963;K03965;K03966;K03934;K03935;K03936;K03937;K03938;K03940;K03941;K00234;K00235;K00411;K00412;K00413;K00417;K02262;K02256;K02261;K02265;K02266;K02267	K03083;K07297;K07198;K07199;K07200;K04392;K08852;K03237;K03942;K03943;K03949;K03950;K03952;K03953;K03955;K11352;K11353;K03963;K03965;K03966;K03934;K03936;K03937;K03938;K03940;K03941;K00234;K00411;K00412;K00413;K00417;K02262;K02256;K02261;K02265;K02266;K02267	K03083;K07297;K07198;K07199;K07200;K04392;K08852;K03237;K08738;K03942;K03943;K03945;K03946;K03949;K03950;K03952;K03953;K03955;K11352;K11353;K03963;K03965;K03966;K03934;K03935;K03936;K03937;K03940;K03941;K00234;K00235;K00411;K00413;K00417;K00419;K02256;K02261;K02265;K02266;K02267
ko04931	K06269;K07203;K04688;K03083;K14497;K07198;K07199;K07200;K17605;K00688;K06276;K01110;K09667;K00820	K06269;K07203;K04688;K03083;K14497;K07198;K07199;K07200;K17605;K00688;K06276;K01110;K09667;K00820	K06269;K07203;K04688;K03083;K14497;K07198;K07199;K07200;K17605;K00688;K06276;K01110;K09667;K00820
ko05110	K02145;K02147;K02148;K02149;K02150;K02152;K02154;K02146;K02144;K02155;K03661;K10949;K10950;K10956;K09481;K07342;K07937	K02145;K02147;K02148;K02149;K02150;K02151;K02152;K02154;K02146;K02144;K02155;K03661;K10949;K10950;K10956;K09481;K07342;K07937	K02145;K02147;K02148;K02149;K02150;K02151;K02152;K02154;K02146;K02144;K02155;K03661;K10949;K10950;K10956;K09481;K07937
ko05120	K04392;K02145;K02147;K02148;K02149;K02150;K02152;K02154;K02146;K02144;K02155;K03661	K04392;K02145;K02147;K02148;K02149;K02150;K02151;K02152;K02154;K02146;K02144;K02155;K03661	K04392;K02145;K02147;K02148;K02149;K02150;K02151;K02152;K02154;K02146;K02144;K02155;K03661
ko05130	K07374;K07375;K05747;K05757;K05758;K05756;K05755;K05754;K11294	K07374;K07375;K05747;K05757;K05758;K05756;K05755;K05754;K11294	K07374;K07375;K05757;K05758;K05756;K05755;K11294
ko05132	K05399;K04392;K04371;K05747;K05754;K05755;K05756;K05757;K05758;K07897;K05759	K05399;K04392;K04371;K05747;K05754;K05755;K05756;K05757;K05758;K07897;K05759	K05399;K04392;K04371;K05755;K05756;K05757;K05758;K07897;K05759
ko05131	K04392;K05754;K05755;K05756;K05757;K05758;K05747;K05759;K08339;K04371;K12836;K13728	K04392;K05754;K05755;K05756;K05757;K05758;K05747;K05759;K08339;K04371;K12836;K13728	K19241;K04392;K05755;K05756;K05757;K05758;K05759;K08339;K04371;K12836
ko05133	K02183;K05765;K04733;K04730;K04371	K02183;K05765;K04733;K04730;K04371	K02183;K05765;K04733;K04730;K04371
ko05134	K04077;K07937;K07874;K08517;K07953;K13525;K08738;K14416;K03231;K03283;K03233;K03596	K04077;K07937;K07874;K08517;K07953;K13525;K14416;K03231;K03283;K03233;K03596	K04077;K07937;K07874;K08517;K07953;K13525;K08738;K14416;K03231;K03283;K03233;K03596
ko05150	K01315	K01315	0
ko05152	K08738;K04515;K08064;K08065;K08066;K04498;K04043;K04077;K05399;K04733;K04730;K04371;K04718;K02183;K00914;K07889;K07897;K02154;K02146;K02144;K02155;K03661;K06268	K04515;K08064;K08065;K08066;K04498;K04043;K04077;K05399;K04733;K04730;K04371;K04718;K02183;K00914;K07889;K07897;K02154;K02146;K02144;K02155;K03661;K06268	K08738;K04515;K08064;K08065;K08066;K04498;K04043;K04077;K05399;K04733;K04730;K04371;K04718;K02183;K00914;K07889;K07897;K02154;K02146;K02144;K02155;K03661;K06268
ko05100	K04392;K05747;K05757;K05758;K05756;K05755;K05754;K01528;K04646;K13728	K04392;K05747;K05757;K05758;K05756;K05755;K05754;K01528;K04646;K13728	K04392;K05757;K05758;K05756;K05755;K01528;K04646;K19241
ko05166	K08874;K15304;K07936;K14290;K08057;K06268;K08054;K00787;K05863;K15040;K15305;K15306;K02537;K02180;K03363;K03348;K03349;K03350;K03351;K03352;K03353;K03354;K03355;K03357;K04802;K02327;K02328;K03504;K03505;K02324;K02325;K02326;K03506;K06620;K03083;K04421;K15308;K08065;K03120;K04498;K06062;K09420;K04728;K06640	K08874;K15304;K07936;K14290;K08057;K06268;K08054;K00787;K05863;K15040;K15305;K15306;K02537;K02180;K03363;K03348;K03349;K03350;K03351;K03352;K03353;K03354;K03355;K03357;K04802;K02327;K02328;K03504;K03505;K02324;K02325;K02326;K03506;K06620;K03083;K04421;K15308;K08065;K03120;K04498;K06062;K09420;K04728;K06640	K08874;K15304;K07936;K14290;K08057;K06268;K08054;K00787;K05863;K15040;K15305;K15306;K02180;K03363;K03348;K03349;K03350;K03351;K03352;K03353;K03354;K03355;K03357;K04802;K02327;K02328;K03504;K02325;K03506;K06620;K03083;K04421;K08065;K04498;K06062;K09420;K04728
ko05162	K03083;K04730;K04733;K03097;K03115;K14753;K02206;K03283;K03247;K16196;K03237;K10144	K03083;K04730;K04733;K03097;K03115;K14753;K02206;K03283;K03247;K16196;K03237;K10144	K03083;K04730;K04733;K03097;K03115;K14753;K02206;K03283;K03247;K16196;K03237;K10144
ko05164	K09523;K03283;K16196;K03237;K04498;K04733;K08738;K03083;K12812;K14290;K04368;K04371;K00787;K14404;K14396;K14298;K15047;K14297;K01315	K09523;K03283;K16196;K03237;K04498;K04733;K03083;K12812;K14290;K04368;K04371;K00787;K14404;K14396;K14298;K15047;K14297;K01315	K09523;K03283;K16196;K03237;K04498;K04733;K08738;K03083;K12812;K14290;K04368;K04371;K00787;K14404;K14396;K14298;K14297
ko05161	K04498;K10610;K10140;K01110;K08738;K04802;K04368;K04371;K11594;K06620;K02206;K06627	K04498;K10610;K10140;K01110;K04802;K04368;K04371;K11594;K06620;K02206;K06627	K04498;K10610;K10140;K01110;K08738;K04802;K04368;K04371;K11594;K06620;K02206;K06627
ko05160	K16196;K03237;K03250;K03456;K04354;K04382;K04706;K04371;K06276;K03083	K16196;K03237;K03250;K03456;K04354;K04382;K04706;K04371;K06276;K03083	K16196;K03237;K03250;K03456;K04354;K04382;K04706;K04371;K06276;K03083
ko05168	K11838;K16196;K03237;K06269;K03094;K03347;K03875;K14840;K11674;K03006;K12890;K12891;K12893;K12896;K04498;K02206;K03097;K03115;K03120;K03133;K03131;K03130;K03129;K03127;K03134;K12881;K15414;K08738	K11838;K16196;K03237;K06269;K03094;K03347;K03875;K14840;K11674;K03006;K12890;K12891;K12893;K12896;K04498;K02206;K03097;K03115;K03120;K03133;K03131;K03130;K03129;K03127;K03134;K12881;K15414	K11838;K16196;K03237;K06269;K03094;K03347;K03875;K14840;K11674;K03006;K12890;K12891;K12893;K12896;K04498;K02206;K03097;K03115;K03133;K03131;K03130;K03129;K03134;K12881;K15414;K08738
ko05169	K03006;K03010;K03011;K03008;K03012;K03015;K03013;K03014;K03016;K03007;K03018;K03021;K03027;K03020;K03023;K03026;K14721;K03025;K03024;K03022;K03019;K14290;K07936;K14317;K03283;K06630;K03124;K15979;K03136;K03137;K06063;K06067;K04498;K03120;K03061;K03062;K03063;K03064;K03065;K03066;K03028;K03032;K03033;K03035;K03036;K03037;K03038;K03039;K03029;K03030;K03031;K11838;K03097;K03115;K06627;K02206;K03875;…	K03006;K03010;K03011;K03008;K03012;K03015;K03013;K03014;K03016;K03018;K03021;K03027;K03020;K03023;K03026;K14721;K03025;K03024;K03022;K03019;K14290;K07936;K14317;K03283;K06630;K03124;K15979;K03136;K03137;K06063;K06067;K04498;K03120;K03061;K03062;K03063;K03064;K03065;K03066;K03028;K03032;K03033;K03035;K03036;K03037;K03038;K03039;K03029;K03030;K03031;K11838;K03097;K03115;K06627;K02206;K03875;K03083;…	K03006;K03010;K03011;K03008;K03012;K03015;K03013;K03014;K03016;K03018;K03027;K03020;K03023;K03026;K14721;K03025;K03024;K14290;K07936;K14317;K03283;K06630;K03124;K15979;K03136;K03137;K06063;K06067;K04498;K03061;K03062;K03063;K03064;K03065;K03066;K03028;K03032;K03033;K03035;K03036;K03037;K03038;K03039;K03029;K03030;K03031;K11838;K03097;K03115;K06627;K02206;K03875;K03083;K04730;K01510;K10591;K16196
ko05146	K07889;K07897;K01476;K13963	K07889;K07897;K01476;K13963	K07889;K07897;K01476;K13963
ko05145	K04730;K04733;K04371;K03283;K13412;K08738;K06276	K04730;K04733;K04371;K03283;K13412;K06276	K04730;K04733;K04371;K03283;K13412;K08738;K06276
ko05140	K04730;K04733;K01404;K04371	K04730;K04733;K01404;K04371	K04730;K04733;K01404;K04371
ko05142	K04730;K04733;K04371;K03456;K04354;K04382;K08057;K01354	K04730;K04733;K04371;K03456;K04354;K04382;K08057;K01354	K04730;K04733;K04371;K03456;K04354;K04382;K08057;K01354
ko05143	K01404;K01392;K01354	K01404;K01392;K01354	K01404;K01392;K01354
ko01502	K01000;K02563	K01000;K02563	K02563
ko01503	K03767;K00677	K00677	K00677
ko04072	0	K07203;K07937;K01115;K13523;K04368;K04371;K00889;K00901;K01528	K07203;K07937;K01115;K13523;K04368;K04371;K00889;K00901;K01528
